# Supplementary material for: Antidepressants amitriptyline, fluoxetine, and traditional Chinese medicine Xiaoyaosan caused alterations in gut DNA virome composition and function in rats exposed chronic unpredictable mild stress
Source: Front Microbiol. 2023 Apr 14;14:1132403. doi: 10.3389/fmicb.2023.1132403 (PMC10140408; doi:10.3389/fmicb.2023.1132403)
Supplement: SUPPLEMENTARY TABLE S7 — List of host assignment per vOTUs. Host assignment for vOTUs was determined using Blastn, CRISPRs, and tRNAs matching. [file Table_7.xlsx]

## Sheet: Sheet1
Supplementary Table S7.List of host assignment per vOTUs
virus	host_anno	contig	Prediction method
vOTU-77	[Bacillus] selenitireducens MLS10 (taxid 439292)	NODE_12572_length_6600_cov_3.818335	Blastn
vOTU-77	[Bacillus] selenitireducens MLS10 (taxid 439292)	NODE_14075_length_6245_cov_3.640726	Blastn
vOTU-1137	[Bacillus] selenitireducens MLS10 (taxid 439292)	NODE_26387_length_3440_cov_91.704728	Blastn
vOTU-1412	[Bacillus] selenitireducens MLS10 (taxid 439292)	NODE_26387_length_3440_cov_91.704728	Blastn
vOTU-1626	[Bacillus] selenitireducens MLS10 (taxid 439292)	NODE_26387_length_3440_cov_91.704728	Blastn
vOTU-398	[Bacillus] selenitireducens MLS10 (taxid 439292)	NODE_26387_length_3440_cov_91.704728	Blastn
vOTU-525	[Bacillus] selenitireducens MLS10 (taxid 439292)	NODE_26387_length_3440_cov_91.704728	Blastn
vOTU-600	[Bacillus] selenitireducens MLS10 (taxid 439292)	NODE_26387_length_3440_cov_91.704728	Blastn
vOTU-806	[Bacillus] selenitireducens MLS10 (taxid 439292)	NODE_26387_length_3440_cov_91.704728	Blastn
vOTU-4724	[Brevibacterium] frigoritolerans (taxid 450367)	NODE_83166_length_1181_cov_1.063406	tRNA
vOTU-158	[Clostridium] cellulosi (taxid 29343)	NODE_29309_length_3157_cov_2.910714	Blastn
vOTU-2	[Clostridium] cellulosi (taxid 29343)	NODE_19766_length_4381_cov_2.334805	Blastn
vOTU-343	[Clostridium] cellulosi (taxid 29343)	NODE_3334_length_25104_cov_28.519199	Blastn
vOTU-222	[Clostridium] cellulosi (taxid 29343)	NODE_1687_length_49775_cov_20.696789	Blastn、CRISPR
vOTU-165	[Clostridium] cellulosi (taxid 29343)	NODE_1687_length_49775_cov_20.696789	Blastn、CRISPR
vOTU-158	[Clostridium] cellulosi (taxid 29343)	NODE_7981_length_10717_cov_4.237218	Blastn
vOTU-25	[Clostridium] cellulosi (taxid 29343)	NODE_4046_length_20726_cov_12.201075	Blastn
vOTU-343	[Clostridium] cellulosi (taxid 29343)	NODE_4600_length_20792_cov_6.356601	Blastn
vOTU-165	[Clostridium] cellulosi (taxid 29343)	NODE_1687_length_49775_cov_20.696789	Blastn
vOTU-17	[Clostridium] cellulosi (taxid 29343)	NODE_1687_length_49775_cov_20.696789	Blastn
vOTU-1432	[Clostridium] cellulosi (taxid 29343)	NODE_1687_length_49775_cov_20.696789	CRISPR
vOTU-5842	[Clostridium] cellulosi (taxid 29343)	NODE_1687_length_49775_cov_20.696789	CRISPR
vOTU-678	[Clostridium] cellulosi (taxid 29343)	NODE_1687_length_49775_cov_20.696789	CRISPR
vOTU-901	[Clostridium] cellulosi (taxid 29343)	NODE_1687_length_49775_cov_20.696789	CRISPR
vOTU-13	[Clostridium] cellulosi (taxid 29343)	NODE_21362_length_4093_cov_3.000249	Blastn
vOTU-12	[Clostridium] cellulosi (taxid 29343)	NODE_21362_length_4093_cov_3.000249	tRNA
vOTU-25	[Clostridium] cellulosi (taxid 29343)	NODE_4869_length_17777_cov_18.238418	Blastn
vOTU-13	[Clostridium] cellulosi (taxid 29343)	NODE_897_length_65664_cov_9.871468	Blastn、CRISPR
vOTU-111	[Clostridium] cellulosi (taxid 29343)	NODE_219842_length_746_cov_4.786248	tRNA
vOTU-125	[Clostridium] cellulosi (taxid 29343)	NODE_36148_length_3133_cov_4.333770	tRNA
vOTU-2	[Clostridium] cellulosi (taxid 29343)	NODE_36148_length_3133_cov_4.333770	tRNA
vOTU-7	[Clostridium] cellulosi (taxid 29343)	NODE_36148_length_3133_cov_4.333770	tRNA
vOTU-1	[Clostridium] cellulosi (taxid 29343)	NODE_105735_length_1300_cov_1.997547	tRNA
vOTU-13	[Clostridium] cellulosi (taxid 29343)	NODE_6645_length_14541_cov_4.907702	Blastn
vOTU-12	[Clostridium] cellulosi (taxid 29343)	NODE_6645_length_14541_cov_4.907702	tRNA
vOTU-1609	[Clostridium] cellulosi (taxid 29343)	NODE_897_length_65664_cov_9.871468	CRISPR
vOTU-12	[Clostridium] cellulosi (taxid 29343)	NODE_897_length_65664_cov_9.871468	tRNA
vOTU-125	[Clostridium] cellulosi (taxid 29343)	NODE_957703_length_318_cov_15.697095	tRNA
vOTU-2541	[Clostridium] cellulosi (taxid 29343)	NODE_957703_length_318_cov_15.697095	tRNA
vOTU-289	[Clostridium] cellulosi (taxid 29343)	NODE_957703_length_318_cov_15.697095	tRNA
vOTU-390	[Clostridium] cellulosi (taxid 29343)	NODE_957703_length_318_cov_15.697095	tRNA
vOTU-435	[Clostridium] cellulosi (taxid 29343)	NODE_957703_length_318_cov_15.697095	tRNA
vOTU-45	[Clostridium] cellulosi (taxid 29343)	NODE_957703_length_318_cov_15.697095	tRNA
vOTU-768	[Clostridium] cellulosi (taxid 29343)	NODE_957703_length_318_cov_15.697095	tRNA
vOTU-212	[Clostridium] hylemonae DSM 15053 (taxid 553973)	NODE_1033_length_62692_cov_45.410237	Blastn
vOTU-39	[Clostridium] hylemonae DSM 15053 (taxid 553973)	NODE_1033_length_62692_cov_45.410237	Blastn
vOTU-1230	[Clostridium] hylemonae DSM 15053 (taxid 553973)	NODE_1033_length_62692_cov_45.410237	tRNA
vOTU-21	[Clostridium] hylemonae DSM 15053 (taxid 553973)	NODE_1698_length_45424_cov_6.636316	Blastn
vOTU-212	[Clostridium] hylemonae DSM 15053 (taxid 553973)	NODE_1108_length_67009_cov_14.770737	Blastn
vOTU-39	[Clostridium] hylemonae DSM 15053 (taxid 553973)	NODE_1108_length_67009_cov_14.770737	Blastn
vOTU-4	[Clostridium] hylemonae DSM 15053 (taxid 553973)	NODE_1232_length_57571_cov_6.283943	Blastn
vOTU-230	[Clostridium] hylemonae DSM 15053 (taxid 553973)	NODE_118476_length_1308_cov_2.541836	tRNA
vOTU-36	[Clostridium] hylemonae DSM 15053 (taxid 553973)	NODE_118476_length_1308_cov_2.541836	tRNA
vOTU-76	[Clostridium] hylemonae DSM 15053 (taxid 553973)	NODE_118476_length_1308_cov_2.541836	tRNA
vOTU-1732	[Clostridium] hylemonae DSM 15053 (taxid 553973)	NODE_13477_length_7574_cov_3.039082	tRNA
vOTU-210	[Clostridium] hylemonae DSM 15053 (taxid 553973)	NODE_13477_length_7574_cov_3.039082	tRNA
vOTU-21	[Clostridium] hylemonae DSM 15053 (taxid 553973)	NODE_24945_length_3787_cov_3.140162	Blastn
vOTU-25	[Clostridium] hylemonae DSM 15053 (taxid 553973)	NODE_9820_length_8751_cov_7.608946	Blastn
vOTU-21	[Clostridium] hylemonae DSM 15053 (taxid 553973)	NODE_2283_length_38597_cov_7.824247	Blastn
vOTU-204	[Clostridium] hylemonae DSM 15053 (taxid 553973)	NODE_1739_length_44745_cov_18.446136	tRNA
vOTU-230	[Clostridium] hylemonae DSM 15053 (taxid 553973)	NODE_1739_length_44745_cov_18.446136	tRNA
vOTU-2845	[Clostridium] hylemonae DSM 15053 (taxid 553973)	NODE_1739_length_44745_cov_18.446136	tRNA
vOTU-36	[Clostridium] hylemonae DSM 15053 (taxid 553973)	NODE_1739_length_44745_cov_18.446136	tRNA
vOTU-76	[Clostridium] hylemonae DSM 15053 (taxid 553973)	NODE_1739_length_44745_cov_18.446136	tRNA
vOTU-640	[Clostridium] hylemonae DSM 15053 (taxid 553973)	NODE_77_length_229949_cov_15.664013	Blastn
vOTU-827	[Clostridium] hylemonae DSM 15053 (taxid 553973)	NODE_548_length_102155_cov_11.005359	Blastn
vOTU-1374	[Clostridium] hylemonae DSM 15053 (taxid 553973)	NODE_18109_length_3447_cov_2.976261	tRNA
vOTU-1732	[Clostridium] hylemonae DSM 15053 (taxid 553973)	NODE_18109_length_3447_cov_2.976261	tRNA
vOTU-210	[Clostridium] hylemonae DSM 15053 (taxid 553973)	NODE_18109_length_3447_cov_2.976261	tRNA
vOTU-2900	[Clostridium] hylemonae DSM 15053 (taxid 553973)	NODE_18109_length_3447_cov_2.976261	tRNA
vOTU-3810	[Clostridium] hylemonae DSM 15053 (taxid 553973)	NODE_18109_length_3447_cov_2.976261	tRNA
vOTU-58	[Clostridium] hylemonae DSM 15053 (taxid 553973)	NODE_1558_length_37031_cov_5.399740	Blastn
vOTU-180	[Clostridium] hylemonae DSM 15053 (taxid 553973)	NODE_2996_length_28100_cov_23.462513	Blastn
vOTU-200	[Clostridium] hylemonae DSM 15053 (taxid 553973)	NODE_4764_length_18151_cov_49.609660	Blastn
vOTU-212	[Clostridium] hylemonae DSM 15053 (taxid 553973)	NODE_30045_length_3263_cov_4.743252	Blastn
vOTU-39	[Clostridium] hylemonae DSM 15053 (taxid 553973)	NODE_30045_length_3263_cov_4.743252	Blastn
vOTU-1933	[Clostridium] hylemonae DSM 15053 (taxid 553973)	NODE_794287_length_304_cov_0.607930	tRNA
vOTU-28	[Clostridium] hylemonae DSM 15053 (taxid 553973)	NODE_71181_length_1633_cov_2.010283	tRNA
vOTU-1933	[Clostridium] hylemonae DSM 15053 (taxid 553973)	NODE_189107_length_876_cov_1.906133	tRNA
vOTU-1933	[Clostridium] hylemonae DSM 15053 (taxid 553973)	NODE_29740_length_3290_cov_3.353564	tRNA
vOTU-209	[Clostridium] hylemonae DSM 15053 (taxid 553973)	NODE_525_length_92906_cov_108.208351	Blastn
vOTU-179	[Clostridium] hylemonae DSM 15053 (taxid 553973)	NODE_525_length_92906_cov_108.208351	tRNA
vOTU-204	[Clostridium] hylemonae DSM 15053 (taxid 553973)	NODE_527291_length_498_cov_8.254157	tRNA
vOTU-230	[Clostridium] hylemonae DSM 15053 (taxid 553973)	NODE_527291_length_498_cov_8.254157	tRNA
vOTU-2870	[Clostridium] hylemonae DSM 15053 (taxid 553973)	NODE_527291_length_498_cov_8.254157	tRNA
vOTU-36	[Clostridium] hylemonae DSM 15053 (taxid 553973)	NODE_527291_length_498_cov_8.254157	tRNA
vOTU-76	[Clostridium] hylemonae DSM 15053 (taxid 553973)	NODE_527291_length_498_cov_8.254157	tRNA
vOTU-204	[Clostridium] hylemonae DSM 15053 (taxid 553973)	NODE_536215_length_492_cov_6.079518	tRNA
vOTU-230	[Clostridium] hylemonae DSM 15053 (taxid 553973)	NODE_536215_length_492_cov_6.079518	tRNA
vOTU-2870	[Clostridium] hylemonae DSM 15053 (taxid 553973)	NODE_536215_length_492_cov_6.079518	tRNA
vOTU-36	[Clostridium] hylemonae DSM 15053 (taxid 553973)	NODE_536215_length_492_cov_6.079518	tRNA
vOTU-76	[Clostridium] hylemonae DSM 15053 (taxid 553973)	NODE_536215_length_492_cov_6.079518	tRNA
vOTU-1933	[Clostridium] hylemonae DSM 15053 (taxid 553973)	NODE_240828_length_863_cov_2.262087	tRNA
vOTU-1933	[Clostridium] hylemonae DSM 15053 (taxid 553973)	NODE_3870_length_24281_cov_5.622211	tRNA
vOTU-194	[Clostridium] hylemonae DSM 15053 (taxid 553973)	NODE_375782_length_632_cov_3.091892	tRNA
vOTU-204	[Clostridium] hylemonae DSM 15053 (taxid 553973)	NODE_335148_length_685_cov_1.468750	tRNA
vOTU-209	[Clostridium] hylemonae DSM 15053 (taxid 553973)	NODE_580_length_86992_cov_33.184686	Blastn
vOTU-179	[Clostridium] hylemonae DSM 15053 (taxid 553973)	NODE_580_length_86992_cov_33.184686	tRNA
vOTU-209	[Clostridium] hylemonae DSM 15053 (taxid 553973)	NODE_587_length_92906_cov_42.261276	Blastn
vOTU-179	[Clostridium] hylemonae DSM 15053 (taxid 553973)	NODE_587_length_92906_cov_42.261276	tRNA
vOTU-80	[Clostridium] hylemonae DSM 15053 (taxid 553973)	NODE_19822_length_5459_cov_5.362690	tRNA
vOTU-98	[Clostridium] hylemonae DSM 15053 (taxid 553973)	NODE_4470_length_21315_cov_5.445287	tRNA
vOTU-110	[Clostridium] hylemonae DSM 15053 (taxid 553973)	NODE_6853_length_12069_cov_6.887759	Blastn
vOTU-98	[Clostridium] hylemonae DSM 15053 (taxid 553973)	NODE_6853_length_12069_cov_6.887759	tRNA
vOTU-31	[Clostridium] hylemonae DSM 15053 (taxid 553973)	NODE_6909_length_8423_cov_4.838845	Blastn
vOTU-73	[Clostridium] hylemonae DSM 15053 (taxid 553973)	NODE_6909_length_8423_cov_4.838845	Blastn
vOTU-1933	[Clostridium] hylemonae DSM 15053 (taxid 553973)	NODE_298042_length_549_cov_2.822034	tRNA
vOTU-209	[Clostridium] hylemonae DSM 15053 (taxid 553973)	NODE_795_length_81876_cov_63.347633	Blastn
vOTU-179	[Clostridium] hylemonae DSM 15053 (taxid 553973)	NODE_795_length_81876_cov_63.347633	tRNA
vOTU-250	[Clostridium] hylemonae DSM 15053 (taxid 553973)	NODE_828_length_74499_cov_7.755462	Blastn
vOTU-429	[Clostridium] hylemonae DSM 15053 (taxid 553973)	NODE_828_length_74499_cov_7.755462	Blastn
vOTU-210	[Clostridium] hylemonae DSM 15053 (taxid 553973)	NODE_828_length_74499_cov_7.755462	tRNA
vOTU-364	[Clostridium] hylemonae DSM 15053 (taxid 553973)	NODE_828_length_74499_cov_7.755462	tRNA
vOTU-3804	[Clostridium] hylemonae DSM 15053 (taxid 553973)	NODE_828_length_74499_cov_7.755462	tRNA
vOTU-734	[Clostridium] hylemonae DSM 15053 (taxid 553973)	NODE_828_length_74499_cov_7.755462	tRNA
vOTU-1933	[Clostridium] hylemonae DSM 15053 (taxid 553973)	NODE_30571_length_3562_cov_3.816069	tRNA
vOTU-204	[Clostridium] hylemonae DSM 15053 (taxid 553973)	NODE_87543_length_1627_cov_3.160645	tRNA
vOTU-110	[Clostridium] hylemonae DSM 15053 (taxid 553973)	NODE_877_length_67068_cov_37.750907	Blastn
vOTU-98	[Clostridium] hylemonae DSM 15053 (taxid 553973)	NODE_877_length_67068_cov_37.750907	tRNA
vOTU-180	[Clostridium] hylemonae DSM 15053 (taxid 553973)	NODE_911_length_64993_cov_8.110805	Blastn
vOTU-30	[Clostridium] hylemonae DSM 15053 (taxid 553973)	NODE_911_length_64993_cov_8.110805	Blastn
vOTU-212	[Clostridium] hylemonae DSM 15053 (taxid 553973)	NODE_911_length_69583_cov_16.789543	Blastn
vOTU-39	[Clostridium] hylemonae DSM 15053 (taxid 553973)	NODE_911_length_69583_cov_16.789543	Blastn
vOTU-1230	[Clostridium] hylemonae DSM 15053 (taxid 553973)	NODE_911_length_69583_cov_16.789543	tRNA
vOTU-98	[Clostridium] hylemonae DSM 15053 (taxid 553973)	NODE_6294_length_13951_cov_6.934986	tRNA
vOTU-1732	[Clostridium] hylemonae DSM 15053 (taxid 553973)	NODE_989_length_71416_cov_9.012658	tRNA
vOTU-230	[Clostridium] hylemonae DSM 15053 (taxid 553973)	NODE_989_length_71416_cov_9.012658	tRNA
vOTU-36	[Clostridium] hylemonae DSM 15053 (taxid 553973)	NODE_989_length_71416_cov_9.012658	tRNA
vOTU-76	[Clostridium] hylemonae DSM 15053 (taxid 553973)	NODE_989_length_71416_cov_9.012658	tRNA
vOTU-1701	[Clostridium] innocuum (taxid 1522)	NODE_4910_length_17051_cov_9.193826	Blastn
vOTU-172	[Clostridium] innocuum (taxid 1522)	NODE_11284_length_8940_cov_10.605890	Blastn
vOTU-526	[Clostridium] innocuum (taxid 1522)	NODE_11284_length_8940_cov_10.605890	Blastn
vOTU-844	[Clostridium] innocuum (taxid 1522)	NODE_35619_length_2863_cov_9.706748	Blastn
vOTU-97	[Clostridium] innocuum (taxid 1522)	NODE_23502_length_4737_cov_3.178112	Blastn
vOTU-1137	[Clostridium] innocuum (taxid 1522)	NODE_20469_length_4447_cov_62.046682	Blastn
vOTU-1412	[Clostridium] innocuum (taxid 1522)	NODE_20469_length_4447_cov_62.046682	Blastn
vOTU-1626	[Clostridium] innocuum (taxid 1522)	NODE_20469_length_4447_cov_62.046682	Blastn
vOTU-398	[Clostridium] innocuum (taxid 1522)	NODE_20469_length_4447_cov_62.046682	Blastn
vOTU-525	[Clostridium] innocuum (taxid 1522)	NODE_20469_length_4447_cov_62.046682	Blastn
vOTU-600	[Clostridium] innocuum (taxid 1522)	NODE_20469_length_4447_cov_62.046682	Blastn
vOTU-806	[Clostridium] innocuum (taxid 1522)	NODE_20469_length_4447_cov_62.046682	Blastn
vOTU-2760	[Clostridium] innocuum (taxid 1522)	NODE_5250_length_11090_cov_7.935168	Blastn
vOTU-525	[Clostridium] innocuum (taxid 1522)	NODE_24823_length_4525_cov_68.200315	Blastn
vOTU-974	[Clostridium] innocuum (taxid 1522)	NODE_24823_length_4525_cov_68.200315	Blastn
vOTU-992	[Clostridium] innocuum (taxid 1522)	NODE_24823_length_4525_cov_68.200315	Blastn
vOTU-47	[Clostridium] innocuum (taxid 1522)	NODE_25087_length_4163_cov_19.720999	Blastn
vOTU-815	[Clostridium] innocuum (taxid 1522)	NODE_2362_length_34138_cov_8.412965	Blastn
vOTU-844	[Clostridium] innocuum (taxid 1522)	NODE_26289_length_4010_cov_9.747012	Blastn
vOTU-1308	[Clostridium] innocuum (taxid 1522)	NODE_30187_length_3252_cov_35.332598	Blastn
vOTU-1626	[Clostridium] innocuum (taxid 1522)	NODE_30187_length_3252_cov_35.332598	Blastn
vOTU-1137	[Clostridium] innocuum (taxid 1522)	NODE_7406_length_7888_cov_21.811292	Blastn
vOTU-1412	[Clostridium] innocuum (taxid 1522)	NODE_7406_length_7888_cov_21.811292	Blastn
vOTU-1626	[Clostridium] innocuum (taxid 1522)	NODE_7406_length_7888_cov_21.811292	Blastn
vOTU-1991	[Clostridium] innocuum (taxid 1522)	NODE_7406_length_7888_cov_21.811292	Blastn
vOTU-2023	[Clostridium] innocuum (taxid 1522)	NODE_7406_length_7888_cov_21.811292	Blastn
vOTU-2161	[Clostridium] innocuum (taxid 1522)	NODE_7406_length_7888_cov_21.811292	Blastn
vOTU-2167	[Clostridium] innocuum (taxid 1522)	NODE_7406_length_7888_cov_21.811292	Blastn
vOTU-2723	[Clostridium] innocuum (taxid 1522)	NODE_7406_length_7888_cov_21.811292	Blastn
vOTU-277	[Clostridium] innocuum (taxid 1522)	NODE_7406_length_7888_cov_21.811292	Blastn
vOTU-3221	[Clostridium] innocuum (taxid 1522)	NODE_7406_length_7888_cov_21.811292	Blastn
vOTU-3633	[Clostridium] innocuum (taxid 1522)	NODE_7406_length_7888_cov_21.811292	Blastn
vOTU-3746	[Clostridium] innocuum (taxid 1522)	NODE_7406_length_7888_cov_21.811292	Blastn
vOTU-3942	[Clostridium] innocuum (taxid 1522)	NODE_7406_length_7888_cov_21.811292	Blastn
vOTU-398	[Clostridium] innocuum (taxid 1522)	NODE_7406_length_7888_cov_21.811292	Blastn
vOTU-4252	[Clostridium] innocuum (taxid 1522)	NODE_7406_length_7888_cov_21.811292	Blastn
vOTU-4339	[Clostridium] innocuum (taxid 1522)	NODE_7406_length_7888_cov_21.811292	Blastn
vOTU-4845	[Clostridium] innocuum (taxid 1522)	NODE_7406_length_7888_cov_21.811292	Blastn
vOTU-4860	[Clostridium] innocuum (taxid 1522)	NODE_7406_length_7888_cov_21.811292	Blastn
vOTU-4985	[Clostridium] innocuum (taxid 1522)	NODE_7406_length_7888_cov_21.811292	Blastn
vOTU-525	[Clostridium] innocuum (taxid 1522)	NODE_7406_length_7888_cov_21.811292	Blastn
vOTU-5374	[Clostridium] innocuum (taxid 1522)	NODE_7406_length_7888_cov_21.811292	Blastn
vOTU-600	[Clostridium] innocuum (taxid 1522)	NODE_7406_length_7888_cov_21.811292	Blastn
vOTU-6266	[Clostridium] innocuum (taxid 1522)	NODE_7406_length_7888_cov_21.811292	Blastn
vOTU-6624	[Clostridium] innocuum (taxid 1522)	NODE_7406_length_7888_cov_21.811292	Blastn
vOTU-806	[Clostridium] innocuum (taxid 1522)	NODE_7406_length_7888_cov_21.811292	Blastn
vOTU-172	[Clostridium] innocuum (taxid 1522)	NODE_9226_length_8944_cov_9.704635	Blastn
vOTU-526	[Clostridium] innocuum (taxid 1522)	NODE_9226_length_8944_cov_9.704635	Blastn
vOTU-1	[Clostridium] saccharolyticum WM1 (taxid 610130)	NODE_11088_length_7441_cov_2.559343	Blastn
vOTU-194	[Clostridium] saccharolyticum WM1 (taxid 610130)	NODE_1086_length_62146_cov_12.410962	tRNA
vOTU-204	[Clostridium] saccharolyticum WM1 (taxid 610130)	NODE_1086_length_62146_cov_12.410962	tRNA
vOTU-267	[Clostridium] saccharolyticum WM1 (taxid 610130)	NODE_2716_length_30577_cov_8.363705	Blastn
vOTU-118	[Clostridium] saccharolyticum WM1 (taxid 610130)	NODE_8652_length_9900_cov_4.014965	Blastn
vOTU-19	[Clostridium] saccharolyticum WM1 (taxid 610130)	NODE_15887_length_5597_cov_2.999094	Blastn
vOTU-267	[Clostridium] saccharolyticum WM1 (taxid 610130)	NODE_3100_length_26533_cov_4.296606	Blastn
vOTU-131	[Clostridium] saccharolyticum WM1 (taxid 610130)	NODE_14539_length_7100_cov_4.998007	Blastn
vOTU-241	[Clostridium] saccharolyticum WM1 (taxid 610130)	NODE_7893_length_12416_cov_32.519653	Blastn
vOTU-53	[Clostridium] saccharolyticum WM1 (taxid 610130)	NODE_9891_length_5915_cov_3.853888	Blastn
vOTU-267	[Clostridium] saccharolyticum WM1 (taxid 610130)	NODE_1440_length_50482_cov_9.348081	Blastn
vOTU-106	[Clostridium] saccharolyticum WM1 (taxid 610130)	NODE_73093_length_1604_cov_1.979699	tRNA
vOTU-106	[Clostridium] saccharolyticum WM1 (taxid 610130)	NODE_385400_length_547_cov_1.257447	tRNA
vOTU-31	[Clostridium] saccharolyticum WM1 (taxid 610130)	NODE_4420_length_18806_cov_13.823002	Blastn
vOTU-73	[Clostridium] saccharolyticum WM1 (taxid 610130)	NODE_4420_length_18806_cov_13.823002	Blastn
vOTU-204	[Clostridium] saccharolyticum WM1 (taxid 610130)	NODE_7149_length_11968_cov_4.276175	tRNA
vOTU-1732	[Clostridium] saccharolyticum WM1 (taxid 610130)	NODE_481_length_96647_cov_74.707818	tRNA
vOTU-194	[Clostridium] saccharolyticum WM1 (taxid 610130)	NODE_481_length_96647_cov_74.707818	tRNA
vOTU-210	[Clostridium] saccharolyticum WM1 (taxid 610130)	NODE_481_length_96647_cov_74.707818	tRNA
vOTU-165	[Clostridium] saccharolyticum WM1 (taxid 610130)	NODE_5525_length_15188_cov_7.632255	Blastn
vOTU-222	[Clostridium] saccharolyticum WM1 (taxid 610130)	NODE_5525_length_15188_cov_7.632255	Blastn
vOTU-4	[Clostridium] saccharolyticum WM1 (taxid 610130)	NODE_57_length_216300_cov_34.629369	Blastn、tRNA
vOTU-813	[Clostridium] saccharolyticum WM1 (taxid 610130)	NODE_57_length_216300_cov_34.629369	Blastn
vOTU-3455	[Clostridium] saccharolyticum WM1 (taxid 610130)	NODE_811_length_81112_cov_6.961634	tRNA
vOTU-1374	[Clostridium] saccharolyticum WM1 (taxid 610130)	NODE_6477_length_13570_cov_8.741792	tRNA
vOTU-204	[Clostridium] saccharolyticum WM1 (taxid 610130)	NODE_6477_length_13570_cov_8.741792	tRNA
vOTU-230	[Clostridium] saccharolyticum WM1 (taxid 610130)	NODE_6477_length_13570_cov_8.741792	tRNA
vOTU-36	[Clostridium] saccharolyticum WM1 (taxid 610130)	NODE_6477_length_13570_cov_8.741792	tRNA
vOTU-76	[Clostridium] saccharolyticum WM1 (taxid 610130)	NODE_6477_length_13570_cov_8.741792	tRNA
vOTU-376	[Clostridium] saccharolyticum WM1 (taxid 610130)	NODE_702_length_89494_cov_23.209367	Blastn
vOTU-384	[Clostridium] saccharolyticum WM1 (taxid 610130)	NODE_702_length_89494_cov_23.209367	Blastn
vOTU-319	[Clostridium] saccharolyticum WM1 (taxid 610130)	NODE_702_length_89494_cov_23.209367	tRNA
vOTU-4	[Clostridium] saccharolyticum WM1 (taxid 610130)	NODE_78_length_216504_cov_41.490942	Blastn、tRNA
vOTU-813	[Clostridium] saccharolyticum WM1 (taxid 610130)	NODE_78_length_216504_cov_41.490942	Blastn
vOTU-4	[Clostridium] saccharolyticum WM1 (taxid 610130)	NODE_82_length_216503_cov_109.273151	Blastn、tRNA
vOTU-813	[Clostridium] saccharolyticum WM1 (taxid 610130)	NODE_82_length_216503_cov_109.273151	Blastn
vOTU-2845	[Clostridium] saccharolyticum WM1 (taxid 610130)	NODE_4677_length_18466_cov_27.822774	tRNA
vOTU-36	[Clostridium] saccharolyticum WM1 (taxid 610130)	NODE_40319_length_2887_cov_9.402135	tRNA
vOTU-4	[Clostridium] saccharolyticum WM1 (taxid 610130)	NODE_96_length_216503_cov_61.593196	Blastn、tRNA
vOTU-813	[Clostridium] saccharolyticum WM1 (taxid 610130)	NODE_96_length_216503_cov_61.593196	Blastn
vOTU-230	[Clostridium] scindens (taxid 29347)	NODE_10061_length_9897_cov_6.036354	tRNA
vOTU-36	[Clostridium] scindens (taxid 29347)	NODE_10061_length_9897_cov_6.036354	tRNA
vOTU-76	[Clostridium] scindens (taxid 29347)	NODE_10061_length_9897_cov_6.036354	tRNA
vOTU-107	[Clostridium] scindens (taxid 29347)	NODE_20002_length_4335_cov_7.435885	Blastn
vOTU-107	[Clostridium] scindens (taxid 29347)	NODE_5828_length_14276_cov_6.433340	Blastn
vOTU-56	[Clostridium] scindens (taxid 29347)	NODE_3224_length_25903_cov_6.685046	Blastn
vOTU-80	[Clostridium] scindens (taxid 29347)	NODE_39224_length_2521_cov_3.312602	Blastn
vOTU-1535	[Clostridium] scindens (taxid 29347)	NODE_13968_length_6288_cov_5.608598	Blastn
vOTU-173	[Clostridium] scindens (taxid 29347)	NODE_7755_length_11017_cov_9.777239	Blastn
vOTU-19	[Clostridium] scindens (taxid 29347)	NODE_41000_length_2566_cov_3.820008	Blastn
vOTU-25	[Clostridium] scindens (taxid 29347)	NODE_7061_length_12102_cov_7.273264	Blastn
vOTU-25	[Clostridium] scindens (taxid 29347)	NODE_9911_length_8678_cov_7.700732	Blastn
vOTU-204	[Clostridium] scindens (taxid 29347)	NODE_139085_length_1077_cov_3.111000	tRNA
vOTU-2870	[Clostridium] scindens (taxid 29347)	NODE_139085_length_1077_cov_3.111000	tRNA
vOTU-320	[Clostridium] scindens (taxid 29347)	NODE_13946_length_6740_cov_3.042924	Blastn
vOTU-60	[Clostridium] scindens (taxid 29347)	NODE_13946_length_6740_cov_3.042924	Blastn
vOTU-576	[Clostridium] scindens (taxid 29347)	NODE_14046_length_7308_cov_7.531323	Blastn
vOTU-641	[Clostridium] scindens (taxid 29347)	NODE_14046_length_7308_cov_7.531323	Blastn
vOTU-626	[Clostridium] scindens (taxid 29347)	NODE_6882_length_12404_cov_3.847489	Blastn
vOTU-230	[Clostridium] scindens (taxid 29347)	NODE_14615_length_6026_cov_4.158514	tRNA
vOTU-36	[Clostridium] scindens (taxid 29347)	NODE_14615_length_6026_cov_4.158514	tRNA
vOTU-76	[Clostridium] scindens (taxid 29347)	NODE_14615_length_6026_cov_4.158514	tRNA
vOTU-173	[Clostridium] scindens (taxid 29347)	NODE_7973_length_12296_cov_20.232179	Blastn
vOTU-212	[Clostridium] scindens (taxid 29347)	NODE_5251_length_18146_cov_5.390337	Blastn
vOTU-214	[Clostridium] scindens (taxid 29347)	NODE_43558_length_2926_cov_9.722710	Blastn
vOTU-25	[Clostridium] scindens (taxid 29347)	NODE_31746_length_3722_cov_9.206310	Blastn
vOTU-273	[Clostridium] scindens (taxid 29347)	NODE_18976_length_5662_cov_6.679678	Blastn
vOTU-273	[Clostridium] scindens (taxid 29347)	NODE_31633_length_3732_cov_9.485636	Blastn
vOTU-320	[Clostridium] scindens (taxid 29347)	NODE_16703_length_6320_cov_2.299215	Blastn
vOTU-38	[Clostridium] scindens (taxid 29347)	NODE_16560_length_6363_cov_72.611995	Blastn
vOTU-406	[Clostridium] scindens (taxid 29347)	NODE_1705_length_49314_cov_5.642322	Blastn
vOTU-406	[Clostridium] scindens (taxid 29347)	NODE_27993_length_4105_cov_3.368421	Blastn
vOTU-38	[Clostridium] scindens (taxid 29347)	NODE_1679_length_45791_cov_13.120095	Blastn
vOTU-36	[Clostridium] scindens (taxid 29347)	NODE_1679_length_45791_cov_13.120095	tRNA
vOTU-554	[Clostridium] scindens (taxid 29347)	NODE_4178_length_22731_cov_13.019290	Blastn
vOTU-59	[Clostridium] scindens (taxid 29347)	NODE_35693_length_3400_cov_73.023172	Blastn
vOTU-59	[Clostridium] scindens (taxid 29347)	NODE_7238_length_13427_cov_48.559775	Blastn
vOTU-60	[Clostridium] scindens (taxid 29347)	NODE_5294_length_18008_cov_4.219675	Blastn
vOTU-63	[Clostridium] scindens (taxid 29347)	NODE_1254_length_61376_cov_70.527725	Blastn
vOTU-1355	[Clostridium] scindens (taxid 29347)	NODE_1896_length_41518_cov_17.408340	Blastn
vOTU-1408	[Clostridium] scindens (taxid 29347)	NODE_1896_length_41518_cov_17.408340	Blastn
vOTU-1612	[Clostridium] scindens (taxid 29347)	NODE_1896_length_41518_cov_17.408340	Blastn
vOTU-576	[Clostridium] scindens (taxid 29347)	NODE_1896_length_41518_cov_17.408340	Blastn
vOTU-641	[Clostridium] scindens (taxid 29347)	NODE_1896_length_41518_cov_17.408340	Blastn
vOTU-204	[Clostridium] scindens (taxid 29347)	NODE_190213_length_932_cov_35.676023	tRNA
vOTU-230	[Clostridium] scindens (taxid 29347)	NODE_190213_length_932_cov_35.676023	tRNA
vOTU-2870	[Clostridium] scindens (taxid 29347)	NODE_190213_length_932_cov_35.676023	tRNA
vOTU-36	[Clostridium] scindens (taxid 29347)	NODE_190213_length_932_cov_35.676023	tRNA
vOTU-76	[Clostridium] scindens (taxid 29347)	NODE_190213_length_932_cov_35.676023	tRNA
vOTU-270	[Clostridium] scindens (taxid 29347)	NODE_1915_length_40471_cov_3.947542	tRNA
vOTU-76	[Clostridium] scindens (taxid 29347)	NODE_1915_length_40471_cov_3.947542	tRNA
vOTU-173	[Clostridium] scindens (taxid 29347)	NODE_9630_length_6062_cov_3.879031	Blastn
vOTU-25	[Clostridium] scindens (taxid 29347)	NODE_17437_length_3556_cov_13.168439	Blastn
vOTU-3179	[Clostridium] scindens (taxid 29347)	NODE_21365_length_3019_cov_3.935078	Blastn
vOTU-44	[Clostridium] scindens (taxid 29347)	NODE_4709_length_12444_cov_8.652786	Blastn
vOTU-173	[Clostridium] scindens (taxid 29347)	NODE_5647_length_15520_cov_8.556174	Blastn
vOTU-173	[Clostridium] scindens (taxid 29347)	NODE_7172_length_12296_cov_17.497095	Blastn
vOTU-180	[Clostridium] scindens (taxid 29347)	NODE_11549_length_7943_cov_7.811976	Blastn
vOTU-25	[Clostridium] scindens (taxid 29347)	NODE_10993_length_8315_cov_2.937970	Blastn
vOTU-1355	[Clostridium] scindens (taxid 29347)	NODE_2741_length_22017_cov_10.814038	Blastn
vOTU-1408	[Clostridium] scindens (taxid 29347)	NODE_2741_length_22017_cov_10.814038	Blastn
vOTU-1612	[Clostridium] scindens (taxid 29347)	NODE_2741_length_22017_cov_10.814038	Blastn
vOTU-1767	[Clostridium] scindens (taxid 29347)	NODE_2741_length_22017_cov_10.814038	Blastn
vOTU-2220	[Clostridium] scindens (taxid 29347)	NODE_2741_length_22017_cov_10.814038	Blastn
vOTU-2633	[Clostridium] scindens (taxid 29347)	NODE_2741_length_22017_cov_10.814038	Blastn
vOTU-4257	[Clostridium] scindens (taxid 29347)	NODE_2741_length_22017_cov_10.814038	Blastn
vOTU-576	[Clostridium] scindens (taxid 29347)	NODE_2741_length_22017_cov_10.814038	Blastn
vOTU-641	[Clostridium] scindens (taxid 29347)	NODE_2741_length_22017_cov_10.814038	Blastn
vOTU-273	[Clostridium] scindens (taxid 29347)	NODE_23369_length_4413_cov_3.427352	Blastn
vOTU-406	[Clostridium] scindens (taxid 29347)	NODE_36548_length_3108_cov_2.650940	Blastn
vOTU-63	[Clostridium] scindens (taxid 29347)	NODE_929_length_66869_cov_22.188271	Blastn
vOTU-1556	[Clostridium] scindens (taxid 29347)	NODE_31753_length_3128_cov_25.471649	Blastn
vOTU-1230	[Clostridium] scindens (taxid 29347)	NODE_31753_length_3128_cov_25.471649	tRNA
vOTU-30	[Clostridium] scindens (taxid 29347)	NODE_335_length_121659_cov_42.219810	Blastn
vOTU-309	[Clostridium] scindens (taxid 29347)	NODE_335_length_121659_cov_42.219810	Blastn
vOTU-2632	[Clostridium] scindens (taxid 29347)	NODE_133120_length_1056_cov_2.767109	tRNA
vOTU-204	[Clostridium] scindens (taxid 29347)	NODE_3839_length_24426_cov_6.150396	tRNA
vOTU-270	[Clostridium] scindens (taxid 29347)	NODE_3839_length_24426_cov_6.150396	tRNA
vOTU-2870	[Clostridium] scindens (taxid 29347)	NODE_3839_length_24426_cov_6.150396	tRNA
vOTU-1230	[Clostridium] scindens (taxid 29347)	NODE_408_length_110275_cov_15.415697	tRNA
vOTU-257	[Clostridium] scindens (taxid 29347)	NODE_408_length_110275_cov_15.415697	tRNA
vOTU-621	[Clostridium] scindens (taxid 29347)	NODE_249214_length_685_cov_1.764803	tRNA
vOTU-320	[Clostridium] scindens (taxid 29347)	NODE_4517_length_19126_cov_4.654470	Blastn
vOTU-60	[Clostridium] scindens (taxid 29347)	NODE_4517_length_19126_cov_4.654470	Blastn
vOTU-2632	[Clostridium] scindens (taxid 29347)	NODE_89233_length_1464_cov_2.687815	tRNA
vOTU-406	[Clostridium] scindens (taxid 29347)	NODE_492_length_107862_cov_9.726057	Blastn
vOTU-3079	[Clostridium] scindens (taxid 29347)	NODE_492_length_107862_cov_9.726057	CRISPR
vOTU-537	[Clostridium] scindens (taxid 29347)	NODE_492_length_107862_cov_9.726057	CRISPR
vOTU-5977	[Clostridium] scindens (taxid 29347)	NODE_492_length_107862_cov_9.726057	CRISPR
vOTU-165	[Clostridium] scindens (taxid 29347)	NODE_4977_length_16796_cov_85.625994	Blastn
vOTU-142	[Clostridium] scindens (taxid 29347)	NODE_4977_length_16796_cov_85.625994	tRNA
vOTU-4964	[Clostridium] scindens (taxid 29347)	NODE_25550_length_3712_cov_44.551857	tRNA
vOTU-621	[Clostridium] scindens (taxid 29347)	NODE_182754_length_897_cov_1.459756	tRNA
vOTU-230	[Clostridium] scindens (taxid 29347)	NODE_533188_length_494_cov_6.055156	tRNA
vOTU-36	[Clostridium] scindens (taxid 29347)	NODE_533188_length_494_cov_6.055156	tRNA
vOTU-76	[Clostridium] scindens (taxid 29347)	NODE_533188_length_494_cov_6.055156	tRNA
vOTU-1933	[Clostridium] scindens (taxid 29347)	NODE_2902_length_31187_cov_5.048055	tRNA
vOTU-1933	[Clostridium] scindens (taxid 29347)	NODE_3775_length_24805_cov_9.324976	tRNA
vOTU-194	[Clostridium] scindens (taxid 29347)	NODE_32772_length_3628_cov_4.569699	tRNA
vOTU-194	[Clostridium] scindens (taxid 29347)	NODE_856309_length_346_cov_17.750929	tRNA
vOTU-36	[Clostridium] scindens (taxid 29347)	NODE_5044_length_18840_cov_16.935405	tRNA
vOTU-230	[Clostridium] scindens (taxid 29347)	NODE_63975_length_2047_cov_3.304569	tRNA
vOTU-36	[Clostridium] scindens (taxid 29347)	NODE_63975_length_2047_cov_3.304569	tRNA
vOTU-76	[Clostridium] scindens (taxid 29347)	NODE_63975_length_2047_cov_3.304569	tRNA
vOTU-230	[Clostridium] scindens (taxid 29347)	NODE_691769_length_317_cov_2.008333	tRNA
vOTU-36	[Clostridium] scindens (taxid 29347)	NODE_691769_length_317_cov_2.008333	tRNA
vOTU-76	[Clostridium] scindens (taxid 29347)	NODE_691769_length_317_cov_2.008333	tRNA
vOTU-4128	[Clostridium] scindens (taxid 29347)	NODE_193_length_127299_cov_18.415023	tRNA
vOTU-204	[Clostridium] scindens (taxid 29347)	NODE_757288_length_314_cov_2.928270	tRNA
vOTU-51	[Clostridium] scindens (taxid 29347)	NODE_757288_length_314_cov_2.928270	tRNA
vOTU-204	[Clostridium] scindens (taxid 29347)	NODE_774375_length_334_cov_5.680934	tRNA
vOTU-210	[Clostridium] scindens (taxid 29347)	NODE_774375_length_334_cov_5.680934	tRNA
vOTU-2870	[Clostridium] scindens (taxid 29347)	NODE_774375_length_334_cov_5.680934	tRNA
vOTU-1230	[Clostridium] scindens (taxid 29347)	NODE_4540_length_19035_cov_23.919665	tRNA
vOTU-230	[Clostridium] scindens (taxid 29347)	NODE_818715_length_358_cov_10.327402	tRNA
vOTU-36	[Clostridium] scindens (taxid 29347)	NODE_818715_length_358_cov_10.327402	tRNA
vOTU-76	[Clostridium] scindens (taxid 29347)	NODE_818715_length_358_cov_10.327402	tRNA
vOTU-194	[Clostridium] scindens (taxid 29347)	NODE_364631_length_587_cov_4.725490	tRNA
vOTU-230	[Clostridium] scindens (taxid 29347)	NODE_846803_length_318_cov_10.153527	tRNA
vOTU-36	[Clostridium] scindens (taxid 29347)	NODE_846803_length_318_cov_10.153527	tRNA
vOTU-76	[Clostridium] scindens (taxid 29347)	NODE_846803_length_318_cov_10.153527	tRNA
vOTU-257	[Clostridium] scindens (taxid 29347)	NODE_1686_length_44984_cov_14.049324	tRNA
vOTU-3810	[Clostridium] scindens (taxid 29347)	NODE_647830_length_388_cov_2.080386	tRNA
vOTU-4964	[Clostridium] scindens (taxid 29347)	NODE_4786_length_18047_cov_22.214079	tRNA
vOTU-1222	[Clostridium] scindens ATCC 35704 (taxid 411468)	NODE_5996_length_13864_cov_9.813085	Blastn
vOTU-1655	[Clostridium] scindens ATCC 35704 (taxid 411468)	NODE_16969_length_4997_cov_2.371545	Blastn
vOTU-1280	[Clostridium] scindens ATCC 35704 (taxid 411468)	NODE_1088_length_62010_cov_74.614906	Blastn
vOTU-1300	[Clostridium] scindens ATCC 35704 (taxid 411468)	NODE_1088_length_62010_cov_74.614906	Blastn
vOTU-443	[Clostridium] scindens ATCC 35704 (taxid 411468)	NODE_1088_length_62010_cov_74.614906	Blastn
vOTU-505	[Clostridium] scindens ATCC 35704 (taxid 411468)	NODE_1088_length_62010_cov_74.614906	Blastn
vOTU-600	[Clostridium] scindens ATCC 35704 (taxid 411468)	NODE_1088_length_62010_cov_74.614906	Blastn
vOTU-604	[Clostridium] scindens ATCC 35704 (taxid 411468)	NODE_1088_length_62010_cov_74.614906	Blastn
vOTU-296	[Clostridium] scindens ATCC 35704 (taxid 411468)	NODE_24729_length_3623_cov_4.750141	Blastn
vOTU-374	[Clostridium] scindens ATCC 35704 (taxid 411468)	NODE_35511_length_2719_cov_1.976533	Blastn
vOTU-4	[Clostridium] scindens ATCC 35704 (taxid 411468)	NODE_2683_length_30937_cov_6.359268	Blastn
vOTU-636	[Clostridium] scindens ATCC 35704 (taxid 411468)	NODE_11584_length_7144_cov_9.831046	Blastn
vOTU-636	[Clostridium] scindens ATCC 35704 (taxid 411468)	NODE_14604_length_5740_cov_5.816352	Blastn
vOTU-636	[Clostridium] scindens ATCC 35704 (taxid 411468)	NODE_28734_length_3206_cov_4.905401	Blastn
vOTU-636	[Clostridium] scindens ATCC 35704 (taxid 411468)	NODE_29438_length_3145_cov_9.081160	Blastn
vOTU-636	[Clostridium] scindens ATCC 35704 (taxid 411468)	NODE_35199_length_2737_cov_4.296617	Blastn
vOTU-636	[Clostridium] scindens ATCC 35704 (taxid 411468)	NODE_36701_length_2650_cov_8.733385	Blastn
vOTU-1137	[Clostridium] scindens ATCC 35704 (taxid 411468)	NODE_13031_length_6385_cov_18.377140	Blastn
vOTU-1412	[Clostridium] scindens ATCC 35704 (taxid 411468)	NODE_13031_length_6385_cov_18.377140	Blastn
vOTU-1626	[Clostridium] scindens ATCC 35704 (taxid 411468)	NODE_13031_length_6385_cov_18.377140	Blastn
vOTU-398	[Clostridium] scindens ATCC 35704 (taxid 411468)	NODE_13031_length_6385_cov_18.377140	Blastn
vOTU-525	[Clostridium] scindens ATCC 35704 (taxid 411468)	NODE_13031_length_6385_cov_18.377140	Blastn
vOTU-600	[Clostridium] scindens ATCC 35704 (taxid 411468)	NODE_13031_length_6385_cov_18.377140	Blastn
vOTU-806	[Clostridium] scindens ATCC 35704 (taxid 411468)	NODE_13031_length_6385_cov_18.377140	Blastn
vOTU-1122	[Clostridium] scindens ATCC 35704 (taxid 411468)	NODE_13044_length_4567_cov_8.949889	Blastn
vOTU-357	[Clostridium] scindens ATCC 35704 (taxid 411468)	NODE_13044_length_4567_cov_8.949889	Blastn
vOTU-1412	[Clostridium] scindens ATCC 35704 (taxid 411468)	NODE_14289_length_6158_cov_14.942444	Blastn
vOTU-1560	[Clostridium] scindens ATCC 35704 (taxid 411468)	NODE_15784_length_5624_cov_4.537227	Blastn
vOTU-1655	[Clostridium] scindens ATCC 35704 (taxid 411468)	NODE_4832_length_17577_cov_6.025714	Blastn
vOTU-636	[Clostridium] scindens ATCC 35704 (taxid 411468)	NODE_24276_length_3873_cov_6.454689	Blastn
vOTU-408	[Clostridium] scindens ATCC 35704 (taxid 411468)	NODE_15286_length_5494_cov_85.837179	Blastn
vOTU-955	[Clostridium] scindens ATCC 35704 (taxid 411468)	NODE_15286_length_5494_cov_85.837179	Blastn
vOTU-212	[Clostridium] scindens ATCC 35704 (taxid 411468)	NODE_525_length_104922_cov_5.835481	Blastn
vOTU-406	[Clostridium] scindens ATCC 35704 (taxid 411468)	NODE_3108_length_29416_cov_5.485293	Blastn
vOTU-435	[Clostridium] scindens ATCC 35704 (taxid 411468)	NODE_4166_length_22765_cov_6.655941	Blastn
vOTU-443	[Clostridium] scindens ATCC 35704 (taxid 411468)	NODE_20047_length_5411_cov_8.878328	Blastn
vOTU-604	[Clostridium] scindens ATCC 35704 (taxid 411468)	NODE_41081_length_3060_cov_10.260811	Blastn
vOTU-636	[Clostridium] scindens ATCC 35704 (taxid 411468)	NODE_19144_length_5621_cov_5.898268	Blastn
vOTU-636	[Clostridium] scindens ATCC 35704 (taxid 411468)	NODE_28644_length_4033_cov_5.226491	Blastn
vOTU-636	[Clostridium] scindens ATCC 35704 (taxid 411468)	NODE_37931_length_3247_cov_5.625868	Blastn
vOTU-636	[Clostridium] scindens ATCC 35704 (taxid 411468)	NODE_8277_length_11878_cov_4.068808	Blastn
vOTU-97	[Clostridium] scindens ATCC 35704 (taxid 411468)	NODE_15773_length_6627_cov_5.113893	Blastn
vOTU-97	[Clostridium] scindens ATCC 35704 (taxid 411468)	NODE_47467_length_2741_cov_3.053679	Blastn
vOTU-129	[Clostridium] scindens ATCC 35704 (taxid 411468)	NODE_4913_length_11852_cov_3.550913	Blastn
vOTU-2715	[Clostridium] scindens ATCC 35704 (taxid 411468)	NODE_19178_length_3293_cov_13.530162	Blastn
vOTU-374	[Clostridium] scindens ATCC 35704 (taxid 411468)	NODE_12144_length_4885_cov_2.754368	Blastn
vOTU-815	[Clostridium] scindens ATCC 35704 (taxid 411468)	NODE_15306_length_3968_cov_3.372141	Blastn
vOTU-194	[Clostridium] scindens ATCC 35704 (taxid 411468)	NODE_2531_length_31240_cov_4.228155	tRNA
vOTU-3810	[Clostridium] scindens ATCC 35704 (taxid 411468)	NODE_2531_length_31240_cov_4.228155	tRNA
vOTU-17	[Clostridium] scindens ATCC 35704 (taxid 411468)	NODE_3768_length_22860_cov_14.306413	Blastn
vOTU-443	[Clostridium] scindens ATCC 35704 (taxid 411468)	NODE_18064_length_5409_cov_13.489685	Blastn
vOTU-1280	[Clostridium] scindens ATCC 35704 (taxid 411468)	NODE_28613_length_3216_cov_43.220134	Blastn
vOTU-1300	[Clostridium] scindens ATCC 35704 (taxid 411468)	NODE_28613_length_3216_cov_43.220134	Blastn
vOTU-600	[Clostridium] scindens ATCC 35704 (taxid 411468)	NODE_28613_length_3216_cov_43.220134	Blastn
vOTU-604	[Clostridium] scindens ATCC 35704 (taxid 411468)	NODE_28613_length_3216_cov_43.220134	Blastn
vOTU-604	[Clostridium] scindens ATCC 35704 (taxid 411468)	NODE_8667_length_10359_cov_9.663198	Blastn
vOTU-636	[Clostridium] scindens ATCC 35704 (taxid 411468)	NODE_10931_length_8343_cov_10.097266	Blastn
vOTU-636	[Clostridium] scindens ATCC 35704 (taxid 411468)	NODE_20443_length_4890_cov_12.756285	Blastn
vOTU-636	[Clostridium] scindens ATCC 35704 (taxid 411468)	NODE_23765_length_4352_cov_10.203041	Blastn
vOTU-600	[Clostridium] scindens ATCC 35704 (taxid 411468)	NODE_30398_length_3852_cov_3.715762	Blastn
vOTU-604	[Clostridium] scindens ATCC 35704 (taxid 411468)	NODE_30398_length_3852_cov_3.715762	Blastn
vOTU-1122	[Clostridium] scindens ATCC 35704 (taxid 411468)	NODE_3206_length_26362_cov_9.118395	Blastn
vOTU-357	[Clostridium] scindens ATCC 35704 (taxid 411468)	NODE_3206_length_26362_cov_9.118395	Blastn
vOTU-387	[Clostridium] scindens ATCC 35704 (taxid 411468)	NODE_3206_length_26362_cov_9.118395	Blastn
vOTU-1280	[Clostridium] scindens ATCC 35704 (taxid 411468)	NODE_32643_length_2902_cov_9.480000	Blastn
vOTU-600	[Clostridium] scindens ATCC 35704 (taxid 411468)	NODE_32643_length_2902_cov_9.480000	Blastn
vOTU-604	[Clostridium] scindens ATCC 35704 (taxid 411468)	NODE_32643_length_2902_cov_9.480000	Blastn
vOTU-100	[Clostridium] scindens ATCC 35704 (taxid 411468)	NODE_3269_length_25583_cov_10.692896	Blastn
vOTU-273	[Clostridium] scindens ATCC 35704 (taxid 411468)	NODE_3269_length_25583_cov_10.692896	Blastn
vOTU-88	[Clostridium] scindens ATCC 35704 (taxid 411468)	NODE_3269_length_25583_cov_10.692896	tRNA
vOTU-443	[Clostridium] scindens ATCC 35704 (taxid 411468)	NODE_3270_length_25583_cov_9.651023	Blastn
vOTU-600	[Clostridium] scindens ATCC 35704 (taxid 411468)	NODE_3270_length_25583_cov_9.651023	Blastn
vOTU-604	[Clostridium] scindens ATCC 35704 (taxid 411468)	NODE_3270_length_25583_cov_9.651023	Blastn
vOTU-1300	[Clostridium] scindens ATCC 35704 (taxid 411468)	NODE_3864_length_15510_cov_11.761032	Blastn
vOTU-2072	[Clostridium] scindens ATCC 35704 (taxid 411468)	NODE_3864_length_15510_cov_11.761032	Blastn
vOTU-320	[Clostridium] scindens ATCC 35704 (taxid 411468)	NODE_4748_length_20123_cov_5.227128	Blastn
vOTU-60	[Clostridium] scindens ATCC 35704 (taxid 411468)	NODE_4748_length_20123_cov_5.227128	Blastn
vOTU-129	[Clostridium] scindens ATCC 35704 (taxid 411468)	NODE_481_length_109348_cov_8.157672	Blastn
vOTU-114	[Clostridium] scindens ATCC 35704 (taxid 411468)	NODE_481_length_109348_cov_8.157672	tRNA
vOTU-194	[Clostridium] scindens ATCC 35704 (taxid 411468)	NODE_1833_length_46466_cov_6.168682	tRNA
vOTU-184	[Clostridium] scindens ATCC 35704 (taxid 411468)	NODE_5529_length_10534_cov_11.948169	Blastn
vOTU-223	[Clostridium] scindens ATCC 35704 (taxid 411468)	NODE_5529_length_10534_cov_11.948169	Blastn
vOTU-33	[Clostridium] scindens ATCC 35704 (taxid 411468)	NODE_5529_length_10534_cov_11.948169	Blastn
vOTU-78	[Clostridium] scindens ATCC 35704 (taxid 411468)	NODE_5529_length_10534_cov_11.948169	Blastn
vOTU-184	[Clostridium] scindens ATCC 35704 (taxid 411468)	NODE_7251_length_11352_cov_11.793969	Blastn
vOTU-223	[Clostridium] scindens ATCC 35704 (taxid 411468)	NODE_7251_length_11352_cov_11.793969	Blastn
vOTU-33	[Clostridium] scindens ATCC 35704 (taxid 411468)	NODE_7251_length_11352_cov_11.793969	Blastn
vOTU-78	[Clostridium] scindens ATCC 35704 (taxid 411468)	NODE_7251_length_11352_cov_11.793969	Blastn
vOTU-2632	[Clostridium] scindens ATCC 35704 (taxid 411468)	NODE_498_length_94130_cov_39.313058	tRNA
vOTU-113	[Clostridium] sphenoides JCM 1415 (taxid 1297793)	NODE_5647_length_14841_cov_16.776619	Blastn
vOTU-116	[Clostridium] sphenoides JCM 1415 (taxid 1297793)	NODE_4059_length_20537_cov_6.045797	Blastn
vOTU-116	[Clostridium] sphenoides JCM 1415 (taxid 1297793)	NODE_1078_length_67773_cov_20.174545	Blastn
vOTU-104	[Clostridium] sphenoides JCM 1415 (taxid 1297793)	NODE_1078_length_67773_cov_20.174545	tRNA
vOTU-2098	[Clostridium] sphenoides JCM 1415 (taxid 1297793)	NODE_1078_length_67773_cov_20.174545	tRNA
vOTU-113	[Clostridium] sphenoides JCM 1415 (taxid 1297793)	NODE_7504_length_11364_cov_5.394347	Blastn
vOTU-4	[Clostridium] sphenoides JCM 1415 (taxid 1297793)	NODE_16916_length_5276_cov_3.505482	Blastn
vOTU-4	[Clostridium] sphenoides JCM 1415 (taxid 1297793)	NODE_2139_length_35657_cov_115.112563	Blastn
vOTU-51	[Clostridium] sphenoides JCM 1415 (taxid 1297793)	NODE_14370_length_5824_cov_7.251436	tRNA
vOTU-76	[Clostridium] sphenoides JCM 1415 (taxid 1297793)	NODE_14370_length_5824_cov_7.251436	tRNA
vOTU-204	[Clostridium] sphenoides JCM 1415 (taxid 1297793)	NODE_14470_length_5789_cov_5.763831	tRNA
vOTU-2870	[Clostridium] sphenoides JCM 1415 (taxid 1297793)	NODE_14470_length_5789_cov_5.763831	tRNA
vOTU-36	[Clostridium] sphenoides JCM 1415 (taxid 1297793)	NODE_14470_length_5789_cov_5.763831	tRNA
vOTU-116	[Clostridium] sphenoides JCM 1415 (taxid 1297793)	NODE_1475_length_49535_cov_10.654070	Blastn
vOTU-104	[Clostridium] sphenoides JCM 1415 (taxid 1297793)	NODE_1475_length_49535_cov_10.654070	tRNA
vOTU-2098	[Clostridium] sphenoides JCM 1415 (taxid 1297793)	NODE_1475_length_49535_cov_10.654070	tRNA
vOTU-746	[Clostridium] sphenoides JCM 1415 (taxid 1297793)	NODE_2222_length_35855_cov_15.951311	Blastn、CRISPR
vOTU-4	[Clostridium] sphenoides JCM 1415 (taxid 1297793)	NODE_4332_length_21924_cov_4.264293	Blastn
vOTU-4	[Clostridium] sphenoides JCM 1415 (taxid 1297793)	NODE_5768_length_16617_cov_4.104958	Blastn
vOTU-51	[Clostridium] sphenoides JCM 1415 (taxid 1297793)	NODE_16930_length_5269_cov_5.557203	tRNA
vOTU-76	[Clostridium] sphenoides JCM 1415 (taxid 1297793)	NODE_16930_length_5269_cov_5.557203	tRNA
vOTU-49	[Clostridium] sphenoides JCM 1415 (taxid 1297793)	NODE_1642_length_50556_cov_5.449454	Blastn
vOTU-113	[Clostridium] sphenoides JCM 1415 (taxid 1297793)	NODE_21724_length_2983_cov_2.219546	Blastn
vOTU-49	[Clostridium] sphenoides JCM 1415 (taxid 1297793)	NODE_2123_length_28096_cov_8.333238	Blastn
vOTU-259	[Clostridium] sphenoides JCM 1415 (taxid 1297793)	NODE_37930_length_3024_cov_2.573804	Blastn
vOTU-49	[Clostridium] sphenoides JCM 1415 (taxid 1297793)	NODE_4720_length_18291_cov_14.633359	Blastn
vOTU-79	[Clostridium] sphenoides JCM 1415 (taxid 1297793)	NODE_19336_length_5108_cov_4.958060	Blastn
vOTU-230	[Clostridium] sphenoides JCM 1415 (taxid 1297793)	NODE_31315_length_3499_cov_2.964348	tRNA
vOTU-36	[Clostridium] sphenoides JCM 1415 (taxid 1297793)	NODE_31315_length_3499_cov_2.964348	tRNA
vOTU-204	[Clostridium] sphenoides JCM 1415 (taxid 1297793)	NODE_3268_length_25207_cov_7.388181	tRNA
vOTU-2870	[Clostridium] sphenoides JCM 1415 (taxid 1297793)	NODE_3268_length_25207_cov_7.388181	tRNA
vOTU-36	[Clostridium] sphenoides JCM 1415 (taxid 1297793)	NODE_3268_length_25207_cov_7.388181	tRNA
vOTU-1230	[Clostridium] sphenoides JCM 1415 (taxid 1297793)	NODE_148_length_174121_cov_18.386598	tRNA
vOTU-1669	[Clostridium] sphenoides JCM 1415 (taxid 1297793)	NODE_1288_length_55881_cov_12.757311	tRNA
vOTU-116	[Clostridium] sphenoides JCM 1415 (taxid 1297793)	NODE_366_length_114696_cov_15.529895	Blastn
vOTU-104	[Clostridium] sphenoides JCM 1415 (taxid 1297793)	NODE_366_length_114696_cov_15.529895	tRNA
vOTU-2098	[Clostridium] sphenoides JCM 1415 (taxid 1297793)	NODE_366_length_114696_cov_15.529895	tRNA
vOTU-48	[Clostridium] sphenoides JCM 1415 (taxid 1297793)	NODE_3858_length_22440_cov_5.078254	Blastn
vOTU-46	[Clostridium] sphenoides JCM 1415 (taxid 1297793)	NODE_3858_length_22440_cov_5.078254	tRNA
vOTU-38	[Clostridium] sphenoides JCM 1415 (taxid 1297793)	NODE_3974_length_15017_cov_9.779987	Blastn
vOTU-204	[Clostridium] sphenoides JCM 1415 (taxid 1297793)	NODE_3974_length_15017_cov_9.779987	tRNA
vOTU-2870	[Clostridium] sphenoides JCM 1415 (taxid 1297793)	NODE_3974_length_15017_cov_9.779987	tRNA
vOTU-36	[Clostridium] sphenoides JCM 1415 (taxid 1297793)	NODE_3974_length_15017_cov_9.779987	tRNA
vOTU-113	[Clostridium] sphenoides JCM 1415 (taxid 1297793)	NODE_406_length_104432_cov_26.717263	Blastn
vOTU-132	[Clostridium] sphenoides JCM 1415 (taxid 1297793)	NODE_406_length_104432_cov_26.717263	Blastn
vOTU-588	[Clostridium] sphenoides JCM 1415 (taxid 1297793)	NODE_846_length_73149_cov_11.050293	tRNA
vOTU-113	[Clostridium] sphenoides JCM 1415 (taxid 1297793)	NODE_418_length_118567_cov_13.171111	Blastn
vOTU-132	[Clostridium] sphenoides JCM 1415 (taxid 1297793)	NODE_418_length_118567_cov_13.171111	Blastn
vOTU-204	[Clostridium] sphenoides JCM 1415 (taxid 1297793)	NODE_477905_length_485_cov_46.806373	tRNA
vOTU-2870	[Clostridium] sphenoides JCM 1415 (taxid 1297793)	NODE_477905_length_485_cov_46.806373	tRNA
vOTU-36	[Clostridium] sphenoides JCM 1415 (taxid 1297793)	NODE_477905_length_485_cov_46.806373	tRNA
vOTU-1230	[Clostridium] sphenoides JCM 1415 (taxid 1297793)	NODE_180_length_173286_cov_15.970521	tRNA
vOTU-152	[Clostridium] sphenoides JCM 1415 (taxid 1297793)	NODE_54973_length_2458_cov_9.915582	tRNA
vOTU-38	[Clostridium] sphenoides JCM 1415 (taxid 1297793)	NODE_5579_length_15023_cov_14.899170	Blastn
vOTU-204	[Clostridium] sphenoides JCM 1415 (taxid 1297793)	NODE_5579_length_15023_cov_14.899170	tRNA
vOTU-2870	[Clostridium] sphenoides JCM 1415 (taxid 1297793)	NODE_5579_length_15023_cov_14.899170	tRNA
vOTU-36	[Clostridium] sphenoides JCM 1415 (taxid 1297793)	NODE_5579_length_15023_cov_14.899170	tRNA
vOTU-28	[Clostridium] sphenoides JCM 1415 (taxid 1297793)	NODE_4119_length_23030_cov_5.444866	tRNA
vOTU-570	[Clostridium] sphenoides JCM 1415 (taxid 1297793)	NODE_643_length_87740_cov_11.170596	Blastn
vOTU-478	[Clostridium] sphenoides JCM 1415 (taxid 1297793)	NODE_643_length_87740_cov_11.170596	tRNA
vOTU-204	[Clostridium] sphenoides JCM 1415 (taxid 1297793)	NODE_707002_length_400_cov_62.371517	tRNA
vOTU-2870	[Clostridium] sphenoides JCM 1415 (taxid 1297793)	NODE_707002_length_400_cov_62.371517	tRNA
vOTU-36	[Clostridium] sphenoides JCM 1415 (taxid 1297793)	NODE_707002_length_400_cov_62.371517	tRNA
vOTU-28	[Clostridium] sphenoides JCM 1415 (taxid 1297793)	NODE_60121_length_1452_cov_1.485091	tRNA
vOTU-204	[Clostridium] sphenoides JCM 1415 (taxid 1297793)	NODE_732012_length_322_cov_40.448980	tRNA
vOTU-2870	[Clostridium] sphenoides JCM 1415 (taxid 1297793)	NODE_732012_length_322_cov_40.448980	tRNA
vOTU-230	[Clostridium] sphenoides JCM 1415 (taxid 1297793)	NODE_7374_length_13176_cov_4.576991	tRNA
vOTU-2845	[Clostridium] sphenoides JCM 1415 (taxid 1297793)	NODE_7374_length_13176_cov_4.576991	tRNA
vOTU-1230	[Clostridium] sphenoides JCM 1415 (taxid 1297793)	NODE_119_length_173877_cov_48.650293	tRNA
vOTU-28	[Clostridium] sphenoides JCM 1415 (taxid 1297793)	NODE_2325_length_34550_cov_7.287210	tRNA
vOTU-104	[Clostridium] ultunense Esp (taxid 1288971)	NODE_24826_length_3613_cov_2.631222	Blastn
vOTU-1726	[Clostridium] ultunense Esp (taxid 1288971)	NODE_4966_length_17175_cov_5.621593	Blastn
vOTU-367	[Clostridium] ultunense Esp (taxid 1288971)	NODE_264285_length_700_cov_2.690209	tRNA
vOTU-367	[Clostridium] ultunense Esp (taxid 1288971)	NODE_74914_length_1656_cov_2.372388	tRNA
vOTU-328	[Eubacterium] cellulosolvens 6 (taxid 633697)	NODE_16903_length_5012_cov_3.439108	Blastn
vOTU-21	[Eubacterium] cellulosolvens 6 (taxid 633697)	NODE_20882_length_4378_cov_3.014648	Blastn
vOTU-4	[Eubacterium] cellulosolvens 6 (taxid 633697)	NODE_5995_length_14263_cov_6.664810	Blastn
vOTU-230	[Eubacterium] cellulosolvens 6 (taxid 633697)	NODE_14243_length_6616_cov_43.890962	tRNA
vOTU-2845	[Eubacterium] cellulosolvens 6 (taxid 633697)	NODE_14243_length_6616_cov_43.890962	tRNA
vOTU-1187	[Eubacterium] cellulosolvens 6 (taxid 633697)	NODE_1576_length_47303_cov_9.607822	Blastn
vOTU-667	[Eubacterium] cellulosolvens 6 (taxid 633697)	NODE_1576_length_47303_cov_9.607822	Blastn
vOTU-947	[Eubacterium] cellulosolvens 6 (taxid 633697)	NODE_1576_length_47303_cov_9.607822	Blastn
vOTU-230	[Eubacterium] cellulosolvens 6 (taxid 633697)	NODE_15807_length_6615_cov_7.969257	tRNA
vOTU-2845	[Eubacterium] cellulosolvens 6 (taxid 633697)	NODE_15807_length_6615_cov_7.969257	tRNA
vOTU-16	[Eubacterium] cellulosolvens 6 (taxid 633697)	NODE_18121_length_5395_cov_4.904099	Blastn
vOTU-4330	[Eubacterium] cellulosolvens 6 (taxid 633697)	NODE_551324_length_396_cov_1.482759	tRNA
vOTU-3455	[Eubacterium] cellulosolvens 6 (taxid 633697)	NODE_13590_length_6455_cov_5.075102	tRNA
vOTU-3455	[Eubacterium] cellulosolvens 6 (taxid 633697)	NODE_111379_length_988_cov_2.777168	tRNA
vOTU-3455	[Eubacterium] cellulosolvens 6 (taxid 633697)	NODE_115410_length_967_cov_4.177528	tRNA
vOTU-3455	[Eubacterium] cellulosolvens 6 (taxid 633697)	NODE_150359_length_1103_cov_3.261209	tRNA
vOTU-2	[Eubacterium] eligens ATCC 27750 (taxid 515620)	NODE_30933_length_3031_cov_2.494922	Blastn
vOTU-2	[Eubacterium] eligens ATCC 27750 (taxid 515620)	NODE_3574_length_23515_cov_3.814703	Blastn
vOTU-106	[Eubacterium] eligens ATCC 27750 (taxid 515620)	NODE_10869_length_5403_cov_3.380961	tRNA
vOTU-1230	[Eubacterium] eligens ATCC 27750 (taxid 515620)	NODE_10869_length_5403_cov_3.380961	tRNA
vOTU-4964	[Eubacterium] eligens ATCC 27750 (taxid 515620)	NODE_10869_length_5403_cov_3.380961	tRNA
vOTU-743	[Eubacterium] eligens ATCC 27750 (taxid 515620)	NODE_2257_length_35954_cov_5.654180	Blastn
vOTU-1159	[Eubacterium] eligens ATCC 27750 (taxid 515620)	NODE_25897_length_3675_cov_3.103391	Blastn
vOTU-1159	[Eubacterium] eligens ATCC 27750 (taxid 515620)	NODE_30051_length_3263_cov_2.953233	Blastn
vOTU-49	[Eubacterium] eligens ATCC 27750 (taxid 515620)	NODE_3777_length_22024_cov_9.928236	Blastn
vOTU-743	[Eubacterium] eligens ATCC 27750 (taxid 515620)	NODE_16924_length_5273_cov_2.742687	Blastn
vOTU-743	[Eubacterium] eligens ATCC 27750 (taxid 515620)	NODE_20201_length_4498_cov_2.576566	Blastn
vOTU-743	[Eubacterium] eligens ATCC 27750 (taxid 515620)	NODE_26476_length_3615_cov_2.868570	Blastn
vOTU-743	[Eubacterium] eligens ATCC 27750 (taxid 515620)	NODE_29294_length_3329_cov_3.004920	Blastn
vOTU-743	[Eubacterium] eligens ATCC 27750 (taxid 515620)	NODE_39322_length_2651_cov_3.146853	Blastn
vOTU-25	[Eubacterium] eligens ATCC 27750 (taxid 515620)	NODE_730_length_87603_cov_5.809908	Blastn
vOTU-335	[Eubacterium] eligens ATCC 27750 (taxid 515620)	NODE_1239_length_62078_cov_20.722650	Blastn
vOTU-49	[Eubacterium] eligens ATCC 27750 (taxid 515620)	NODE_12700_length_8012_cov_5.374921	Blastn
vOTU-49	[Eubacterium] eligens ATCC 27750 (taxid 515620)	NODE_25420_length_4438_cov_5.619812	Blastn
vOTU-31	[Eubacterium] eligens ATCC 27750 (taxid 515620)	NODE_18027_length_3458_cov_2.649512	Blastn
vOTU-73	[Eubacterium] eligens ATCC 27750 (taxid 515620)	NODE_18027_length_3458_cov_2.649512	Blastn
vOTU-152	[Eubacterium] eligens ATCC 27750 (taxid 515620)	NODE_20603_length_4859_cov_4.888959	tRNA
vOTU-232	[Eubacterium] eligens ATCC 27750 (taxid 515620)	NODE_20603_length_4859_cov_4.888959	tRNA
vOTU-76	[Eubacterium] eligens ATCC 27750 (taxid 515620)	NODE_20603_length_4859_cov_4.888959	tRNA
vOTU-2336	[Eubacterium] eligens ATCC 27750 (taxid 515620)	NODE_6228_length_9286_cov_5.540884	Blastn
vOTU-25	[Eubacterium] eligens ATCC 27750 (taxid 515620)	NODE_94_length_164106_cov_8.990843	Blastn
vOTU-44	[Eubacterium] eligens ATCC 27750 (taxid 515620)	NODE_127_length_146892_cov_12.826264	Blastn
vOTU-49	[Eubacterium] eligens ATCC 27750 (taxid 515620)	NODE_2512_length_23973_cov_6.889689	Blastn
vOTU-186	[Eubacterium] eligens ATCC 27750 (taxid 515620)	NODE_37985_length_3021_cov_3.333220	Blastn
vOTU-2	[Eubacterium] eligens ATCC 27750 (taxid 515620)	NODE_3457_length_24742_cov_42.900223	Blastn
vOTU-2	[Eubacterium] eligens ATCC 27750 (taxid 515620)	NODE_9581_length_9443_cov_46.999786	Blastn
vOTU-49	[Eubacterium] eligens ATCC 27750 (taxid 515620)	NODE_3712_length_23150_cov_12.848091	Blastn
vOTU-743	[Eubacterium] eligens ATCC 27750 (taxid 515620)	NODE_3282_length_25820_cov_3.718797	Blastn
vOTU-225	[Eubacterium] eligens ATCC 27750 (taxid 515620)	NODE_3209_length_26347_cov_8.070537	Blastn
vOTU-194	[Eubacterium] eligens ATCC 27750 (taxid 515620)	NODE_3209_length_26347_cov_8.070537	tRNA
vOTU-1025	[Eubacterium] eligens ATCC 27750 (taxid 515620)	NODE_3278_length_25540_cov_5.103091	Blastn
vOTU-1159	[Eubacterium] eligens ATCC 27750 (taxid 515620)	NODE_3278_length_25540_cov_5.103091	Blastn
vOTU-225	[Eubacterium] eligens ATCC 27750 (taxid 515620)	NODE_3532_length_26261_cov_7.453330	Blastn
vOTU-194	[Eubacterium] eligens ATCC 27750 (taxid 515620)	NODE_3532_length_26261_cov_7.453330	tRNA
vOTU-114	[Eubacterium] eligens ATCC 27750 (taxid 515620)	NODE_336145_length_560_cov_2.337474	tRNA
vOTU-194	[Eubacterium] eligens ATCC 27750 (taxid 515620)	NODE_257840_length_669_cov_2.434122	tRNA
vOTU-152	[Eubacterium] eligens ATCC 27750 (taxid 515620)	NODE_376340_length_518_cov_8.464853	tRNA
vOTU-230	[Eubacterium] eligens ATCC 27750 (taxid 515620)	NODE_376340_length_518_cov_8.464853	tRNA
vOTU-36	[Eubacterium] eligens ATCC 27750 (taxid 515620)	NODE_376340_length_518_cov_8.464853	tRNA
vOTU-76	[Eubacterium] eligens ATCC 27750 (taxid 515620)	NODE_376340_length_518_cov_8.464853	tRNA
vOTU-2845	[Eubacterium] eligens ATCC 27750 (taxid 515620)	NODE_14266_length_5860_cov_5.813246	tRNA
vOTU-4128	[Eubacterium] eligens ATCC 27750 (taxid 515620)	NODE_60395_length_1834_cov_73.556061	tRNA
vOTU-1025	[Eubacterium] eligens ATCC 27750 (taxid 515620)	NODE_4393_length_19652_cov_3.857676	Blastn
vOTU-1159	[Eubacterium] eligens ATCC 27750 (taxid 515620)	NODE_4393_length_19652_cov_3.857676	Blastn
vOTU-14	[Eubacterium] eligens ATCC 27750 (taxid 515620)	NODE_134_length_183904_cov_18.369614	tRNA
vOTU-194	[Eubacterium] eligens ATCC 27750 (taxid 515620)	NODE_490_length_95950_cov_11.408259	tRNA
vOTU-210	[Eubacterium] eligens ATCC 27750 (taxid 515620)	NODE_660_length_79354_cov_32.518448	tRNA
vOTU-257	[Eubacterium] eligens ATCC 27750 (taxid 515620)	NODE_332134_length_603_cov_1.688213	tRNA
vOTU-4128	[Eubacterium] eligens ATCC 27750 (taxid 515620)	NODE_64633_length_1834_cov_12.723392	tRNA
vOTU-152	[Eubacterium] eligens ATCC 27750 (taxid 515620)	NODE_510167_length_463_cov_2.790155	tRNA
vOTU-230	[Eubacterium] eligens ATCC 27750 (taxid 515620)	NODE_510167_length_463_cov_2.790155	tRNA
vOTU-232	[Eubacterium] eligens ATCC 27750 (taxid 515620)	NODE_510167_length_463_cov_2.790155	tRNA
vOTU-36	[Eubacterium] eligens ATCC 27750 (taxid 515620)	NODE_510167_length_463_cov_2.790155	tRNA
vOTU-76	[Eubacterium] eligens ATCC 27750 (taxid 515620)	NODE_510167_length_463_cov_2.790155	tRNA
vOTU-114	[Eubacterium] eligens ATCC 27750 (taxid 515620)	NODE_376703_length_631_cov_2.548736	tRNA
vOTU-230	[Eubacterium] eligens ATCC 27750 (taxid 515620)	NODE_53718_length_2504_cov_6.767202	tRNA
vOTU-36	[Eubacterium] eligens ATCC 27750 (taxid 515620)	NODE_53718_length_2504_cov_6.767202	tRNA
vOTU-76	[Eubacterium] eligens ATCC 27750 (taxid 515620)	NODE_53718_length_2504_cov_6.767202	tRNA
vOTU-210	[Eubacterium] eligens ATCC 27750 (taxid 515620)	NODE_40644_length_3083_cov_7.704258	tRNA
vOTU-129	[Eubacterium] eligens ATCC 27750 (taxid 515620)	NODE_5734_length_10153_cov_3.190353	Blastn
vOTU-114	[Eubacterium] eligens ATCC 27750 (taxid 515620)	NODE_5734_length_10153_cov_3.190353	tRNA
vOTU-152	[Eubacterium] eligens ATCC 27750 (taxid 515620)	NODE_575005_length_359_cov_10.978723	tRNA
vOTU-230	[Eubacterium] eligens ATCC 27750 (taxid 515620)	NODE_575005_length_359_cov_10.978723	tRNA
vOTU-232	[Eubacterium] eligens ATCC 27750 (taxid 515620)	NODE_575005_length_359_cov_10.978723	tRNA
vOTU-36	[Eubacterium] eligens ATCC 27750 (taxid 515620)	NODE_575005_length_359_cov_10.978723	tRNA
vOTU-76	[Eubacterium] eligens ATCC 27750 (taxid 515620)	NODE_575005_length_359_cov_10.978723	tRNA
vOTU-257	[Eubacterium] eligens ATCC 27750 (taxid 515620)	NODE_14695_length_7039_cov_2.714594	tRNA
vOTU-29	[Eubacterium] eligens ATCC 27750 (taxid 515620)	NODE_43991_length_2904_cov_5.482490	tRNA
vOTU-36	[Eubacterium] eligens ATCC 27750 (taxid 515620)	NODE_3059_length_29865_cov_9.067309	tRNA
vOTU-4128	[Eubacterium] eligens ATCC 27750 (taxid 515620)	NODE_12939_length_7869_cov_7.045303	tRNA
vOTU-1230	[Eubacterium] eligens ATCC 27750 (taxid 515620)	NODE_438502_length_430_cov_2.515581	tRNA
vOTU-225	[Eubacterium] eligens ATCC 27750 (taxid 515620)	NODE_721_length_75161_cov_27.269818	Blastn
vOTU-194	[Eubacterium] eligens ATCC 27750 (taxid 515620)	NODE_721_length_75161_cov_27.269818	tRNA
vOTU-2845	[Eubacterium] eligens ATCC 27750 (taxid 515620)	NODE_543181_length_373_cov_3.631757	tRNA
vOTU-4128	[Eubacterium] eligens ATCC 27750 (taxid 515620)	NODE_5462_length_10679_cov_11.124788	tRNA
vOTU-106	[Eubacterium] eligens ATCC 27750 (taxid 515620)	NODE_414711_length_537_cov_1.915217	tRNA
vOTU-225	[Eubacterium] eligens ATCC 27750 (taxid 515620)	NODE_815_length_75161_cov_56.137899	Blastn
vOTU-194	[Eubacterium] eligens ATCC 27750 (taxid 515620)	NODE_815_length_75161_cov_56.137899	tRNA
vOTU-194	[Eubacterium] eligens ATCC 27750 (taxid 515620)	NODE_500973_length_469_cov_18.670918	tRNA
vOTU-210	[Eubacterium] eligens ATCC 27750 (taxid 515620)	NODE_705_length_79074_cov_10.640607	tRNA
vOTU-100	[Ruminococcus] gnavus ATCC 29149 (taxid 411470)	NODE_4138_length_20132_cov_9.917477	Blastn
vOTU-230	[Ruminococcus] gnavus ATCC 29149 (taxid 411470)	NODE_10499_length_7873_cov_12.397255	tRNA
vOTU-2845	[Ruminococcus] gnavus ATCC 29149 (taxid 411470)	NODE_10499_length_7873_cov_12.397255	tRNA
vOTU-230	[Ruminococcus] gnavus ATCC 29149 (taxid 411470)	NODE_10694_length_8069_cov_9.279780	tRNA
vOTU-36	[Ruminococcus] gnavus ATCC 29149 (taxid 411470)	NODE_10694_length_8069_cov_9.279780	tRNA
vOTU-76	[Ruminococcus] gnavus ATCC 29149 (taxid 411470)	NODE_10694_length_8069_cov_9.279780	tRNA
vOTU-25	[Ruminococcus] gnavus ATCC 29149 (taxid 411470)	NODE_223_length_143044_cov_8.804088	Blastn
vOTU-25	[Ruminococcus] gnavus ATCC 29149 (taxid 411470)	NODE_511_length_98708_cov_8.816234	Blastn
vOTU-25	[Ruminococcus] gnavus ATCC 29149 (taxid 411470)	NODE_8166_length_10091_cov_8.859197	Blastn
vOTU-399	[Ruminococcus] gnavus ATCC 29149 (taxid 411470)	NODE_10967_length_7526_cov_5.108874	Blastn
vOTU-184	[Ruminococcus] gnavus ATCC 29149 (taxid 411470)	NODE_11371_length_5166_cov_2.762822	Blastn
vOTU-223	[Ruminococcus] gnavus ATCC 29149 (taxid 411470)	NODE_11371_length_5166_cov_2.762822	Blastn
vOTU-33	[Ruminococcus] gnavus ATCC 29149 (taxid 411470)	NODE_11371_length_5166_cov_2.762822	Blastn
vOTU-44	[Ruminococcus] gnavus ATCC 29149 (taxid 411470)	NODE_530_length_97078_cov_15.942434	Blastn
vOTU-443	[Ruminococcus] gnavus ATCC 29149 (taxid 411470)	NODE_5269_length_15909_cov_9.213934	Blastn
vOTU-55	[Ruminococcus] gnavus ATCC 29149 (taxid 411470)	NODE_4000_length_20872_cov_16.979322	Blastn
vOTU-78	[Ruminococcus] gnavus ATCC 29149 (taxid 411470)	NODE_8660_length_9539_cov_18.912492	Blastn
vOTU-825	[Ruminococcus] gnavus ATCC 29149 (taxid 411470)	NODE_301_length_127903_cov_13.707579	Blastn
vOTU-84	[Ruminococcus] gnavus ATCC 29149 (taxid 411470)	NODE_62_length_241468_cov_17.413085	Blastn
vOTU-930	[Ruminococcus] gnavus ATCC 29149 (taxid 411470)	NODE_2695_length_30833_cov_8.814150	Blastn
vOTU-100	[Ruminococcus] gnavus ATCC 29149 (taxid 411470)	NODE_3524_length_23474_cov_9.629482	Blastn
vOTU-109	[Ruminococcus] gnavus ATCC 29149 (taxid 411470)	NODE_23057_length_4047_cov_2.752645	Blastn
vOTU-25	[Ruminococcus] gnavus ATCC 29149 (taxid 411470)	NODE_1662_length_43603_cov_8.209139	Blastn
vOTU-25	[Ruminococcus] gnavus ATCC 29149 (taxid 411470)	NODE_20769_length_4395_cov_7.126911	Blastn
vOTU-25	[Ruminococcus] gnavus ATCC 29149 (taxid 411470)	NODE_2095_length_36344_cov_8.393029	Blastn
vOTU-25	[Ruminococcus] gnavus ATCC 29149 (taxid 411470)	NODE_31765_length_3127_cov_9.079016	Blastn
vOTU-25	[Ruminococcus] gnavus ATCC 29149 (taxid 411470)	NODE_37149_length_2769_cov_8.071322	Blastn
vOTU-25	[Ruminococcus] gnavus ATCC 29149 (taxid 411470)	NODE_4078_length_20562_cov_8.126971	Blastn
vOTU-25	[Ruminococcus] gnavus ATCC 29149 (taxid 411470)	NODE_5824_length_14696_cov_8.354333	Blastn
vOTU-284	[Ruminococcus] gnavus ATCC 29149 (taxid 411470)	NODE_31318_length_3161_cov_3.039559	Blastn
vOTU-4	[Ruminococcus] gnavus ATCC 29149 (taxid 411470)	NODE_8939_length_9568_cov_7.059319	Blastn
vOTU-566	[Ruminococcus] gnavus ATCC 29149 (taxid 411470)	NODE_18297_length_4913_cov_16.514268	Blastn
vOTU-100	[Ruminococcus] gnavus ATCC 29149 (taxid 411470)	NODE_1082_length_67751_cov_10.174750	Blastn
vOTU-100	[Ruminococcus] gnavus ATCC 29149 (taxid 411470)	NODE_1907_length_44964_cov_9.999710	Blastn
vOTU-214	[Ruminococcus] gnavus ATCC 29149 (taxid 411470)	NODE_1930_length_44488_cov_10.254712	Blastn
vOTU-214	[Ruminococcus] gnavus ATCC 29149 (taxid 411470)	NODE_5856_length_16419_cov_9.811957	Blastn
vOTU-25	[Ruminococcus] gnavus ATCC 29149 (taxid 411470)	NODE_3485_length_26577_cov_8.926075	Blastn
vOTU-25	[Ruminococcus] gnavus ATCC 29149 (taxid 411470)	NODE_3654_length_25435_cov_9.232510	Blastn
vOTU-25	[Ruminococcus] gnavus ATCC 29149 (taxid 411470)	NODE_452_length_114649_cov_8.828405	Blastn
vOTU-534	[Ruminococcus] gnavus ATCC 29149 (taxid 411470)	NODE_251_length_149024_cov_9.319637	Blastn、CRISPR
vOTU-210	[Ruminococcus] gnavus ATCC 29149 (taxid 411470)	NODE_178244_length_863_cov_2.769720	tRNA
vOTU-3455	[Ruminococcus] gnavus ATCC 29149 (taxid 411470)	NODE_178244_length_863_cov_2.769720	tRNA
vOTU-84	[Ruminococcus] gnavus ATCC 29149 (taxid 411470)	NODE_228_length_157400_cov_10.289557	Blastn
vOTU-865	[Ruminococcus] gnavus ATCC 29149 (taxid 411470)	NODE_2794_length_32499_cov_6.364290	Blastn
vOTU-982	[Ruminococcus] gnavus ATCC 29149 (taxid 411470)	NODE_43225_length_2942_cov_9.070506	Blastn
vOTU-1	[Ruminococcus] gnavus ATCC 29149 (taxid 411470)	NODE_1046_length_50148_cov_12.920773	Blastn
vOTU-100	[Ruminococcus] gnavus ATCC 29149 (taxid 411470)	NODE_1044_length_50218_cov_12.698430	Blastn
vOTU-100	[Ruminococcus] gnavus ATCC 29149 (taxid 411470)	NODE_1228_length_44221_cov_13.538963	Blastn
vOTU-230	[Ruminococcus] gnavus ATCC 29149 (taxid 411470)	NODE_1858_length_39928_cov_9.966852	tRNA
vOTU-36	[Ruminococcus] gnavus ATCC 29149 (taxid 411470)	NODE_1858_length_39928_cov_9.966852	tRNA
vOTU-125	[Ruminococcus] gnavus ATCC 29149 (taxid 411470)	NODE_1870_length_31392_cov_5.838480	tRNA
vOTU-2	[Ruminococcus] gnavus ATCC 29149 (taxid 411470)	NODE_1870_length_31392_cov_5.838480	tRNA
vOTU-7	[Ruminococcus] gnavus ATCC 29149 (taxid 411470)	NODE_1870_length_31392_cov_5.838480	tRNA
vOTU-31	[Ruminococcus] gnavus ATCC 29149 (taxid 411470)	NODE_19858_length_5450_cov_6.096222	Blastn
vOTU-73	[Ruminococcus] gnavus ATCC 29149 (taxid 411470)	NODE_19858_length_5450_cov_6.096222	Blastn
vOTU-2115	[Ruminococcus] gnavus ATCC 29149 (taxid 411470)	NODE_2009_length_39774_cov_9.786558	CRISPR
vOTU-636	[Ruminococcus] gnavus ATCC 29149 (taxid 411470)	NODE_2009_length_39774_cov_9.786558	CRISPR
vOTU-1374	[Ruminococcus] gnavus ATCC 29149 (taxid 411470)	NODE_2009_length_39774_cov_9.786558	tRNA
vOTU-1732	[Ruminococcus] gnavus ATCC 29149 (taxid 411470)	NODE_2009_length_39774_cov_9.786558	tRNA
vOTU-210	[Ruminococcus] gnavus ATCC 29149 (taxid 411470)	NODE_2009_length_39774_cov_9.786558	tRNA
vOTU-2900	[Ruminococcus] gnavus ATCC 29149 (taxid 411470)	NODE_2009_length_39774_cov_9.786558	tRNA
vOTU-2291	[Ruminococcus] gnavus ATCC 29149 (taxid 411470)	NODE_831_length_57096_cov_9.043073	Blastn
vOTU-25	[Ruminococcus] gnavus ATCC 29149 (taxid 411470)	NODE_247_length_111957_cov_12.869011	Blastn
vOTU-25	[Ruminococcus] gnavus ATCC 29149 (taxid 411470)	NODE_990_length_51644_cov_12.660384	Blastn
vOTU-2538	[Ruminococcus] gnavus ATCC 29149 (taxid 411470)	NODE_6323_length_9156_cov_11.739729	Blastn
vOTU-2644	[Ruminococcus] gnavus ATCC 29149 (taxid 411470)	NODE_5000_length_11627_cov_12.838442	Blastn
vOTU-152	[Ruminococcus] gnavus ATCC 29149 (taxid 411470)	NODE_211274_length_767_cov_4.408696	tRNA
vOTU-232	[Ruminococcus] gnavus ATCC 29149 (taxid 411470)	NODE_211274_length_767_cov_4.408696	tRNA
vOTU-76	[Ruminococcus] gnavus ATCC 29149 (taxid 411470)	NODE_211274_length_767_cov_4.408696	tRNA
vOTU-152	[Ruminococcus] gnavus ATCC 29149 (taxid 411470)	NODE_217690_length_926_cov_2.338045	tRNA
vOTU-232	[Ruminococcus] gnavus ATCC 29149 (taxid 411470)	NODE_217690_length_926_cov_2.338045	tRNA
vOTU-76	[Ruminococcus] gnavus ATCC 29149 (taxid 411470)	NODE_217690_length_926_cov_2.338045	tRNA
vOTU-4	[Ruminococcus] gnavus ATCC 29149 (taxid 411470)	NODE_25947_length_2600_cov_2.444312	Blastn
vOTU-57	[Ruminococcus] gnavus ATCC 29149 (taxid 411470)	NODE_9528_length_6131_cov_4.351668	Blastn
vOTU-1174	[Ruminococcus] gnavus ATCC 29149 (taxid 411470)	NODE_251_length_149024_cov_9.319637	CRISPR
vOTU-1	[Ruminococcus] gnavus ATCC 29149 (taxid 411470)	NODE_15225_length_6245_cov_28.250811	Blastn
vOTU-1	[Ruminococcus] gnavus ATCC 29149 (taxid 411470)	NODE_20846_length_4813_cov_41.213260	Blastn
vOTU-152	[Ruminococcus] gnavus ATCC 29149 (taxid 411470)	NODE_2624_length_34161_cov_8.383699	tRNA
vOTU-232	[Ruminococcus] gnavus ATCC 29149 (taxid 411470)	NODE_2624_length_34161_cov_8.383699	tRNA
vOTU-76	[Ruminococcus] gnavus ATCC 29149 (taxid 411470)	NODE_2624_length_34161_cov_8.383699	tRNA
vOTU-152	[Ruminococcus] gnavus ATCC 29149 (taxid 411470)	NODE_26958_length_2525_cov_2.541258	tRNA
vOTU-232	[Ruminococcus] gnavus ATCC 29149 (taxid 411470)	NODE_26958_length_2525_cov_2.541258	tRNA
vOTU-76	[Ruminococcus] gnavus ATCC 29149 (taxid 411470)	NODE_26958_length_2525_cov_2.541258	tRNA
vOTU-186	[Ruminococcus] gnavus ATCC 29149 (taxid 411470)	NODE_9706_length_9335_cov_3.087492	Blastn
vOTU-25	[Ruminococcus] gnavus ATCC 29149 (taxid 411470)	NODE_1400_length_51410_cov_13.229268	Blastn
vOTU-25	[Ruminococcus] gnavus ATCC 29149 (taxid 411470)	NODE_297_length_120625_cov_13.465524	Blastn
vOTU-101	[Ruminococcus] gnavus ATCC 29149 (taxid 411470)	NODE_28004_length_3454_cov_3.593130	Blastn
vOTU-21	[Ruminococcus] gnavus ATCC 29149 (taxid 411470)	NODE_28004_length_3454_cov_3.593130	Blastn
vOTU-825	[Ruminococcus] gnavus ATCC 29149 (taxid 411470)	NODE_3396_length_25059_cov_9.148507	Blastn
vOTU-84	[Ruminococcus] gnavus ATCC 29149 (taxid 411470)	NODE_175_length_149509_cov_14.920934	Blastn
vOTU-930	[Ruminococcus] gnavus ATCC 29149 (taxid 411470)	NODE_17458_length_5563_cov_2.753555	Blastn
vOTU-930	[Ruminococcus] gnavus ATCC 29149 (taxid 411470)	NODE_33127_length_3353_cov_3.242369	Blastn
vOTU-930	[Ruminococcus] gnavus ATCC 29149 (taxid 411470)	NODE_37811_length_3032_cov_3.175973	Blastn
vOTU-930	[Ruminococcus] gnavus ATCC 29149 (taxid 411470)	NODE_48061_length_2529_cov_2.316476	Blastn
vOTU-930	[Ruminococcus] gnavus ATCC 29149 (taxid 411470)	NODE_48810_length_2500_cov_2.632274	Blastn
vOTU-982	[Ruminococcus] gnavus ATCC 29149 (taxid 411470)	NODE_35421_length_3182_cov_17.660225	Blastn
vOTU-562	[Ruminococcus] gnavus ATCC 29149 (taxid 411470)	NODE_217967_length_751_cov_1.632047	CRISPR
vOTU-1280	[Ruminococcus] gnavus ATCC 29149 (taxid 411470)	NODE_3139_length_26232_cov_46.730300	Blastn
vOTU-1300	[Ruminococcus] gnavus ATCC 29149 (taxid 411470)	NODE_3139_length_26232_cov_46.730300	Blastn
vOTU-604	[Ruminococcus] gnavus ATCC 29149 (taxid 411470)	NODE_3139_length_26232_cov_46.730300	Blastn
vOTU-1119	[Ruminococcus] gnavus ATCC 29149 (taxid 411470)	NODE_629001_length_397_cov_1.378125	CRISPR
vOTU-234	[Ruminococcus] gnavus ATCC 29149 (taxid 411470)	NODE_3546_length_23369_cov_32.433024	tRNA
vOTU-300	[Ruminococcus] gnavus ATCC 29149 (taxid 411470)	NODE_3546_length_23369_cov_32.433024	tRNA
vOTU-1385	[Ruminococcus] gnavus ATCC 29149 (taxid 411470)	NODE_6652_length_12423_cov_14.590232	tRNA
vOTU-204	[Ruminococcus] gnavus ATCC 29149 (taxid 411470)	NODE_3405_length_24649_cov_13.593073	tRNA
vOTU-230	[Ruminococcus] gnavus ATCC 29149 (taxid 411470)	NODE_3863_length_22383_cov_14.925446	tRNA
vOTU-36	[Ruminococcus] gnavus ATCC 29149 (taxid 411470)	NODE_3863_length_22383_cov_14.925446	tRNA
vOTU-234	[Ruminococcus] gnavus ATCC 29149 (taxid 411470)	NODE_4064_length_23321_cov_27.239546	tRNA
vOTU-300	[Ruminococcus] gnavus ATCC 29149 (taxid 411470)	NODE_4064_length_23321_cov_27.239546	tRNA
vOTU-152	[Ruminococcus] gnavus ATCC 29149 (taxid 411470)	NODE_4312_length_19326_cov_10.120941	tRNA
vOTU-232	[Ruminococcus] gnavus ATCC 29149 (taxid 411470)	NODE_4312_length_19326_cov_10.120941	tRNA
vOTU-76	[Ruminococcus] gnavus ATCC 29149 (taxid 411470)	NODE_4312_length_19326_cov_10.120941	tRNA
vOTU-1230	[Ruminococcus] gnavus ATCC 29149 (taxid 411470)	NODE_98129_length_1369_cov_2.214396	tRNA
vOTU-1649	[Ruminococcus] gnavus ATCC 29149 (taxid 411470)	NODE_4647_length_17926_cov_6.217379	Blastn
vOTU-1293	[Ruminococcus] gnavus ATCC 29149 (taxid 411470)	NODE_4647_length_17926_cov_6.217379	tRNA
vOTU-1696	[Ruminococcus] gnavus ATCC 29149 (taxid 411470)	NODE_465_length_103343_cov_15.668110	Blastn
vOTU-471	[Ruminococcus] gnavus ATCC 29149 (taxid 411470)	NODE_465_length_103343_cov_15.668110	Blastn
vOTU-537	[Ruminococcus] gnavus ATCC 29149 (taxid 411470)	NODE_465_length_103343_cov_15.668110	Blastn
vOTU-933	[Ruminococcus] gnavus ATCC 29149 (taxid 411470)	NODE_465_length_103343_cov_15.668110	Blastn
vOTU-25	[Ruminococcus] gnavus ATCC 29149 (taxid 411470)	NODE_47_length_274073_cov_14.438236	Blastn
vOTU-24	[Ruminococcus] gnavus ATCC 29149 (taxid 411470)	NODE_47_length_274073_cov_14.438236	tRNA
vOTU-2845	[Ruminococcus] gnavus ATCC 29149 (taxid 411470)	NODE_14734_length_5979_cov_8.052525	tRNA
vOTU-3455	[Ruminococcus] gnavus ATCC 29149 (taxid 411470)	NODE_512704_length_449_cov_4.723118	tRNA
vOTU-36	[Ruminococcus] gnavus ATCC 29149 (taxid 411470)	NODE_231638_length_764_cov_3.209607	tRNA
vOTU-1768	[Ruminococcus] gnavus ATCC 29149 (taxid 411470)	NODE_4869_length_11981_cov_9.147093	Blastn
vOTU-1385	[Ruminococcus] gnavus ATCC 29149 (taxid 411470)	NODE_4869_length_11981_cov_9.147093	tRNA
vOTU-3810	[Ruminococcus] gnavus ATCC 29149 (taxid 411470)	NODE_253753_length_719_cov_2.224299	tRNA
vOTU-152	[Ruminococcus] gnavus ATCC 29149 (taxid 411470)	NODE_491116_length_399_cov_1.838509	tRNA
vOTU-232	[Ruminococcus] gnavus ATCC 29149 (taxid 411470)	NODE_491116_length_399_cov_1.838509	tRNA
vOTU-76	[Ruminococcus] gnavus ATCC 29149 (taxid 411470)	NODE_491116_length_399_cov_1.838509	tRNA
vOTU-230	[Ruminococcus] gnavus ATCC 29149 (taxid 411470)	NODE_5197_length_11175_cov_14.839791	tRNA
vOTU-36	[Ruminococcus] gnavus ATCC 29149 (taxid 411470)	NODE_5197_length_11175_cov_14.839791	tRNA
vOTU-1374	[Ruminococcus] gnavus ATCC 29149 (taxid 411470)	NODE_531689_length_495_cov_13.576555	tRNA
vOTU-1732	[Ruminococcus] gnavus ATCC 29149 (taxid 411470)	NODE_531689_length_495_cov_13.576555	tRNA
vOTU-210	[Ruminococcus] gnavus ATCC 29149 (taxid 411470)	NODE_531689_length_495_cov_13.576555	tRNA
vOTU-2900	[Ruminococcus] gnavus ATCC 29149 (taxid 411470)	NODE_531689_length_495_cov_13.576555	tRNA
vOTU-230	[Ruminococcus] gnavus ATCC 29149 (taxid 411470)	NODE_5325_length_10951_cov_13.097756	tRNA
vOTU-36	[Ruminococcus] gnavus ATCC 29149 (taxid 411470)	NODE_5325_length_10951_cov_13.097756	tRNA
vOTU-76	[Ruminococcus] gnavus ATCC 29149 (taxid 411470)	NODE_5325_length_10951_cov_13.097756	tRNA
vOTU-176	[Ruminococcus] gnavus ATCC 29149 (taxid 411470)	NODE_9447_length_10506_cov_8.285070	tRNA
vOTU-1933	[Ruminococcus] gnavus ATCC 29149 (taxid 411470)	NODE_48364_length_2704_cov_2.302627	tRNA
vOTU-230	[Ruminococcus] gnavus ATCC 29149 (taxid 411470)	NODE_557816_length_478_cov_3.907731	tRNA
vOTU-76	[Ruminococcus] gnavus ATCC 29149 (taxid 411470)	NODE_557816_length_478_cov_3.907731	tRNA
vOTU-204	[Ruminococcus] gnavus ATCC 29149 (taxid 411470)	NODE_3799_length_24649_cov_68.663357	tRNA
vOTU-107	[Ruminococcus] gnavus ATCC 29149 (taxid 411470)	NODE_5580_length_15023_cov_10.976984	Blastn
vOTU-109	[Ruminococcus] gnavus ATCC 29149 (taxid 411470)	NODE_5580_length_15023_cov_10.976984	Blastn
vOTU-204	[Ruminococcus] gnavus ATCC 29149 (taxid 411470)	NODE_565455_length_419_cov_42.818713	tRNA
vOTU-230	[Ruminococcus] gnavus ATCC 29149 (taxid 411470)	NODE_565455_length_419_cov_42.818713	tRNA
vOTU-2845	[Ruminococcus] gnavus ATCC 29149 (taxid 411470)	NODE_565455_length_419_cov_42.818713	tRNA
vOTU-36	[Ruminococcus] gnavus ATCC 29149 (taxid 411470)	NODE_565455_length_419_cov_42.818713	tRNA
vOTU-76	[Ruminococcus] gnavus ATCC 29149 (taxid 411470)	NODE_565455_length_419_cov_42.818713	tRNA
vOTU-230	[Ruminococcus] gnavus ATCC 29149 (taxid 411470)	NODE_573120_length_415_cov_8.396450	tRNA
vOTU-36	[Ruminococcus] gnavus ATCC 29149 (taxid 411470)	NODE_573120_length_415_cov_8.396450	tRNA
vOTU-76	[Ruminococcus] gnavus ATCC 29149 (taxid 411470)	NODE_573120_length_415_cov_8.396450	tRNA
vOTU-204	[Ruminococcus] gnavus ATCC 29149 (taxid 411470)	NODE_584989_length_409_cov_8.599398	tRNA
vOTU-230	[Ruminococcus] gnavus ATCC 29149 (taxid 411470)	NODE_584989_length_409_cov_8.599398	tRNA
vOTU-36	[Ruminococcus] gnavus ATCC 29149 (taxid 411470)	NODE_584989_length_409_cov_8.599398	tRNA
vOTU-76	[Ruminococcus] gnavus ATCC 29149 (taxid 411470)	NODE_584989_length_409_cov_8.599398	tRNA
vOTU-3810	[Ruminococcus] gnavus ATCC 29149 (taxid 411470)	NODE_10469_length_9564_cov_7.916517	tRNA
vOTU-3810	[Ruminococcus] gnavus ATCC 29149 (taxid 411470)	NODE_78766_length_1890_cov_4.471042	tRNA
vOTU-3810	[Ruminococcus] gnavus ATCC 29149 (taxid 411470)	NODE_87730_length_1747_cov_2.344910	tRNA
vOTU-184	[Ruminococcus] gnavus ATCC 29149 (taxid 411470)	NODE_6204_length_13389_cov_6.630784	Blastn
vOTU-223	[Ruminococcus] gnavus ATCC 29149 (taxid 411470)	NODE_6204_length_13389_cov_6.630784	Blastn
vOTU-33	[Ruminococcus] gnavus ATCC 29149 (taxid 411470)	NODE_6204_length_13389_cov_6.630784	Blastn
vOTU-230	[Ruminococcus] gnavus ATCC 29149 (taxid 411470)	NODE_6248_length_14025_cov_4.530757	tRNA
vOTU-36	[Ruminococcus] gnavus ATCC 29149 (taxid 411470)	NODE_6248_length_14025_cov_4.530757	tRNA
vOTU-76	[Ruminococcus] gnavus ATCC 29149 (taxid 411470)	NODE_6248_length_14025_cov_4.530757	tRNA
vOTU-1559	[Ruminococcus] gnavus ATCC 29149 (taxid 411470)	NODE_664307_length_346_cov_1.843866	CRISPR
vOTU-577	[Ruminococcus] gnavus ATCC 29149 (taxid 411470)	NODE_664307_length_346_cov_1.843866	CRISPR
vOTU-804	[Ruminococcus] gnavus ATCC 29149 (taxid 411470)	NODE_664307_length_346_cov_1.843866	CRISPR
vOTU-103	[Ruminococcus] gnavus ATCC 29149 (taxid 411470)	NODE_43559_length_1793_cov_1.945804	tRNA
vOTU-204	[Ruminococcus] gnavus ATCC 29149 (taxid 411470)	NODE_68995_length_1328_cov_13.601119	tRNA
vOTU-230	[Ruminococcus] gnavus ATCC 29149 (taxid 411470)	NODE_68995_length_1328_cov_13.601119	tRNA
vOTU-36	[Ruminococcus] gnavus ATCC 29149 (taxid 411470)	NODE_68995_length_1328_cov_13.601119	tRNA
vOTU-76	[Ruminococcus] gnavus ATCC 29149 (taxid 411470)	NODE_68995_length_1328_cov_13.601119	tRNA
vOTU-3251	[Ruminococcus] gnavus ATCC 29149 (taxid 411470)	NODE_75041_length_1822_cov_2.331805	CRISPR
vOTU-490	[Ruminococcus] gnavus ATCC 29149 (taxid 411470)	NODE_75041_length_1822_cov_2.331805	CRISPR
vOTU-230	[Ruminococcus] gnavus ATCC 29149 (taxid 411470)	NODE_8674_length_11369_cov_10.453241	tRNA
vOTU-36	[Ruminococcus] gnavus ATCC 29149 (taxid 411470)	NODE_8674_length_11369_cov_10.453241	tRNA
vOTU-2845	[Ruminococcus] gnavus ATCC 29149 (taxid 411470)	NODE_179680_length_971_cov_2.744966	tRNA
vOTU-577	[Ruminococcus] gnavus ATCC 29149 (taxid 411470)	NODE_91497_length_1695_cov_2.665637	CRISPR
vOTU-896	[Ruminococcus] gnavus ATCC 29149 (taxid 411470)	NODE_91497_length_1695_cov_2.665637	CRISPR
vOTU-230	[Ruminococcus] gnavus ATCC 29149 (taxid 411470)	NODE_915593_length_329_cov_43.349206	tRNA
vOTU-2845	[Ruminococcus] gnavus ATCC 29149 (taxid 411470)	NODE_915593_length_329_cov_43.349206	tRNA
vOTU-230	[Ruminococcus] gnavus ATCC 29149 (taxid 411470)	NODE_9468_length_9559_cov_13.326724	tRNA
vOTU-36	[Ruminococcus] gnavus ATCC 29149 (taxid 411470)	NODE_9468_length_9559_cov_13.326724	tRNA
vOTU-76	[Ruminococcus] gnavus ATCC 29149 (taxid 411470)	NODE_9468_length_9559_cov_13.326724	tRNA
vOTU-329	[Ruminococcus] gnavus ATCC 29149 (taxid 411470)	NODE_9520_length_6138_cov_2.950173	Blastn
vOTU-353	[Ruminococcus] gnavus ATCC 29149 (taxid 411470)	NODE_9520_length_6138_cov_2.950173	Blastn
vOTU-204	[Ruminococcus] gnavus ATCC 29149 (taxid 411470)	NODE_9810_length_9249_cov_16.839621	tRNA
vOTU-230	[Ruminococcus] gnavus ATCC 29149 (taxid 411470)	NODE_9810_length_9249_cov_16.839621	tRNA
vOTU-2845	[Ruminococcus] gnavus ATCC 29149 (taxid 411470)	NODE_9810_length_9249_cov_16.839621	tRNA
vOTU-36	[Ruminococcus] gnavus ATCC 29149 (taxid 411470)	NODE_9810_length_9249_cov_16.839621	tRNA
vOTU-76	[Ruminococcus] gnavus ATCC 29149 (taxid 411470)	NODE_9810_length_9249_cov_16.839621	tRNA
vOTU-882	Acanthamoeba polyphaga moumouvirus (taxid 1269028)	NODE_9003_length_6459_cov_2.846913	Blastn
vOTU-882	Acanthamoeba polyphaga moumouvirus (taxid 1269028)	NODE_9364_length_9650_cov_3.893764	Blastn
vOTU-379	Acetobacter orientalis (taxid 146474)	NODE_4294_length_13763_cov_3.321935	Blastn
vOTU-105	Acetobacterium sp. KB-1 (taxid 2184575)	NODE_26590_length_3602_cov_8.174184	Blastn
vOTU-105	Acetobacterium sp. KB-1 (taxid 2184575)	NODE_22124_length_4599_cov_8.780849	Blastn
vOTU-121	Acetobacterium sp. KB-1 (taxid 2184575)	NODE_22124_length_4599_cov_8.780849	Blastn
vOTU-1133	Acholeplasma axanthum (taxid 29552)	NODE_17874_length_3481_cov_7.529965	Blastn
vOTU-538	Acholeplasma axanthum (taxid 29552)	NODE_17874_length_3481_cov_7.529965	tRNA
vOTU-908	Acholeplasma axanthum (taxid 29552)	NODE_17874_length_3481_cov_7.529965	tRNA
vOTU-1133	Acholeplasma axanthum (taxid 29552)	NODE_27376_length_3337_cov_3.066871	Blastn
vOTU-538	Acholeplasma axanthum (taxid 29552)	NODE_27376_length_3337_cov_3.066871	tRNA
vOTU-908	Acholeplasma axanthum (taxid 29552)	NODE_27376_length_3337_cov_3.066871	tRNA
vOTU-148	Acholeplasma hippikon (taxid 264636)	NODE_3391_length_27258_cov_19.543247	Blastn
vOTU-129	Acholeplasma hippikon (taxid 264636)	NODE_3391_length_27258_cov_19.543247	tRNA
vOTU-10	Acholeplasma oculi (taxid 35623)	NODE_1849_length_31662_cov_13.129080	tRNA
vOTU-10	Acholeplasma oculi (taxid 35623)	NODE_2330_length_34490_cov_8.243019	tRNA
vOTU-62	Achromobacter pestifer (taxid 1353889)	NODE_19066_length_4515_cov_3.115142	Blastn
vOTU-267	Achromobacter sp. MFA1 R4 (taxid 1881016)	NODE_20304_length_4478_cov_5.538741	Blastn
vOTU-161	Acidaminococcus fermentans DSM 20731 (taxid 591001)	NODE_19225_length_5603_cov_28.419110	Blastn
vOTU-525	Acidaminococcus fermentans DSM 20731 (taxid 591001)	NODE_30807_length_3811_cov_89.140064	Blastn
vOTU-992	Acidaminococcus fermentans DSM 20731 (taxid 591001)	NODE_30807_length_3811_cov_89.140064	Blastn
vOTU-296	Acidaminococcus intestini RyC-MR95 (taxid 568816)	NODE_17290_length_4922_cov_7.810114	Blastn
vOTU-525	Acidaminococcus intestini RyC-MR95 (taxid 568816)	NODE_13812_length_4335_cov_14.893377	Blastn
vOTU-974	Acidaminococcus intestini RyC-MR95 (taxid 568816)	NODE_13812_length_4335_cov_14.893377	Blastn
vOTU-891	Acidaminococcus intestini RyC-MR95 (taxid 568816)	NODE_36877_length_2786_cov_3.521226	Blastn
vOTU-296	Acidaminococcus intestini RyC-MR95 (taxid 568816)	NODE_15597_length_6685_cov_8.794946	Blastn
vOTU-296	Acidaminococcus intestini RyC-MR95 (taxid 568816)	NODE_22818_length_4853_cov_7.070352	Blastn
vOTU-296	Acidaminococcus intestini RyC-MR95 (taxid 568816)	NODE_22024_length_2948_cov_5.773250	Blastn
vOTU-1311	Acidaminococcus intestini RyC-MR95 (taxid 568816)	NODE_4428_length_18775_cov_9.895818	Blastn
vOTU-990	Acidaminococcus intestini RyC-MR95 (taxid 568816)	NODE_4428_length_18775_cov_9.895818	Blastn
vOTU-1916	Acidaminococcus intestini RyC-MR95 (taxid 568816)	NODE_8338_length_6955_cov_4.783658	Blastn
vOTU-2032	Acidaminococcus intestini RyC-MR95 (taxid 568816)	NODE_8338_length_6955_cov_4.783658	Blastn
vOTU-2318	Acidaminococcus intestini RyC-MR95 (taxid 568816)	NODE_8338_length_6955_cov_4.783658	Blastn
vOTU-36	Acidihalobacter prosperus (taxid 160660)	NODE_12810_length_6821_cov_2.984727	Blastn
vOTU-36	Acidihalobacter prosperus (taxid 160660)	NODE_12648_length_8047_cov_3.881556	Blastn
vOTU-88	Acidipropionibacterium acidipropionici ATCC 4875 (taxid 1171373)	NODE_18685_length_5254_cov_11.818041	Blastn
vOTU-5576	Acidithiobacillus sp. 'AMD consortium' (taxid 2614801)	NODE_10179_length_5754_cov_5.038577	Blastn
vOTU-534	Acidovorax avenae subsp. avenae (taxid 80870)	NODE_20712_length_5268_cov_3.684261	tRNA
vOTU-265	Acidovorax citrulli (taxid 80869)	NODE_18339_length_4903_cov_14.302528	Blastn
vOTU-199	Acidovorax sp. 1608163 (taxid 2478662)	NODE_9825_length_8386_cov_7.777591	Blastn
vOTU-672	Acidovorax sp. JMULE5 (taxid 2518343)	NODE_10771_length_7667_cov_12.160738	Blastn
vOTU-672	Acidovorax sp. JMULE5 (taxid 2518343)	NODE_24879_length_2682_cov_4.555854	Blastn
vOTU-3115	Acidovorax sp. T1 (taxid 1858609)	NODE_14546_length_4135_cov_4.252095	Blastn
vOTU-3162	Acidovorax sp. T1 (taxid 1858609)	NODE_14546_length_4135_cov_4.252095	Blastn
vOTU-4146	Acidovorax sp. T1 (taxid 1858609)	NODE_14546_length_4135_cov_4.252095	Blastn
vOTU-28	Acinetobacter (taxid 469)	NODE_32573_length_3647_cov_3.165826	Blastn
vOTU-831	Acinetobacter (taxid 469)	NODE_27747_length_3478_cov_16.432814	Blastn
vOTU-845	Acinetobacter (taxid 469)	NODE_27747_length_3478_cov_16.432814	Blastn
vOTU-1	Acinetobacter calcoaceticus (taxid 471)	NODE_10168_length_8112_cov_3.988799	Blastn
vOTU-428	Acinetobacter defluvii (taxid 1871111)	NODE_13084_length_7789_cov_6.222640	Blastn
vOTU-363	Acinetobacter defluvii (taxid 1871111)	NODE_13084_length_7789_cov_6.222640	tRNA
vOTU-284	Acinetobacter indicus (taxid 756892)	NODE_24352_length_3862_cov_2.520476	Blastn
vOTU-1261	Acinetobacter junii (taxid 40215)	NODE_5136_length_18559_cov_4.998269	tRNA
vOTU-15	Acinetobacter sp. TGL-Y2 (taxid 1407071)	NODE_5421_length_16099_cov_4.810448	Blastn
vOTU-1062	Acinetobacter sp. WCHAc010034 (taxid 1879049)	NODE_18128_length_5394_cov_12.620463	Blastn
vOTU-284	Acinetobacter wuhouensis (taxid 1879050)	NODE_39919_length_2620_cov_2.552497	Blastn
vOTU-820	Actinoalloteichus hoggarensis (taxid 1470176)	NODE_25750_length_3692_cov_3.325588	Blastn
vOTU-131	Actinoalloteichus hymeniacidonis (taxid 340345)	NODE_12944_length_4599_cov_4.994250	Blastn
vOTU-239	Actinobacillus succinogenes 130Z (taxid 339671)	NODE_14829_length_5649_cov_53.508256	Blastn
vOTU-239	Actinobacillus succinogenes 130Z (taxid 339671)	NODE_18327_length_5832_cov_47.362989	Blastn
vOTU-239	Actinobacillus succinogenes 130Z (taxid 339671)	NODE_19832_length_3199_cov_18.303011	Blastn
vOTU-10	Actinobacteria (taxid 1760)	NODE_31714_length_2969_cov_4.423237	Blastn
vOTU-1017	Actinobacteria (taxid 1760)	NODE_21654_length_4047_cov_5.887154	Blastn
vOTU-108	Actinobacteria (taxid 1760)	NODE_7113_length_11603_cov_4.821100	Blastn
vOTU-1030	Actinobacteria (taxid 1760)	NODE_10242_length_8396_cov_51.870658	Blastn
vOTU-949	Actinobacteria (taxid 1760)	NODE_10242_length_8396_cov_51.870658	Blastn
vOTU-13	Actinobacteria (taxid 1760)	NODE_11860_length_6982_cov_2.805214	Blastn
vOTU-13	Actinobacteria (taxid 1760)	NODE_36168_length_2681_cov_2.700845	Blastn
vOTU-6084	Actinobacteria (taxid 1760)	NODE_10824_length_5422_cov_5.646399	Blastn
vOTU-6332	Actinobacteria (taxid 1760)	NODE_10824_length_5422_cov_5.646399	Blastn
vOTU-20	Actinobacteria (taxid 1760)	NODE_37736_length_2599_cov_2.572958	Blastn
vOTU-361	Actinobacteria (taxid 1760)	NODE_2753_length_30205_cov_5.743129	Blastn
vOTU-399	Actinobacteria (taxid 1760)	NODE_36784_length_2646_cov_4.708836	Blastn
vOTU-4	Actinobacteria (taxid 1760)	NODE_4846_length_17235_cov_6.074659	Blastn
vOTU-424	Actinobacteria (taxid 1760)	NODE_23104_length_3832_cov_3.025566	Blastn
vOTU-1072	Actinobacteria (taxid 1760)	NODE_11428_length_5141_cov_6.403831	Blastn
vOTU-1182	Actinobacteria (taxid 1760)	NODE_11428_length_5141_cov_6.403831	Blastn
vOTU-79	Actinobacteria (taxid 1760)	NODE_16715_length_5061_cov_3.161316	Blastn
vOTU-853	Actinobacteria (taxid 1760)	NODE_13033_length_6385_cov_5.907578	Blastn
vOTU-97	Actinobacteria (taxid 1760)	NODE_6175_length_13458_cov_9.377999	Blastn
vOTU-1017	Actinobacteria (taxid 1760)	NODE_27064_length_3547_cov_6.942363	Blastn
vOTU-1072	Actinobacteria (taxid 1760)	NODE_12876_length_6784_cov_16.827345	Blastn
vOTU-1182	Actinobacteria (taxid 1760)	NODE_12876_length_6784_cov_16.827345	Blastn
vOTU-134	Actinobacteria (taxid 1760)	NODE_1742_length_41842_cov_4.456914	Blastn
vOTU-1433	Actinobacteria (taxid 1760)	NODE_41500_length_2542_cov_2.414199	Blastn
vOTU-198	Actinobacteria (taxid 1760)	NODE_6581_length_13002_cov_4.755203	Blastn
vOTU-261	Actinobacteria (taxid 1760)	NODE_17747_length_5050_cov_2.787050	Blastn
vOTU-344	Actinobacteria (taxid 1760)	NODE_8842_length_9681_cov_7.505414	Blastn
vOTU-399	Actinobacteria (taxid 1760)	NODE_19646_length_4617_cov_5.125330	Blastn
vOTU-57	Actinobacteria (taxid 1760)	NODE_10293_length_8366_cov_3.826276	Blastn
vOTU-63	Actinobacteria (taxid 1760)	NODE_12726_length_6859_cov_3.589502	Blastn
vOTU-13	Actinobacteria (taxid 1760)	NODE_23199_length_4790_cov_4.298748	Blastn
vOTU-150	Actinobacteria (taxid 1760)	NODE_39334_length_3159_cov_3.671317	Blastn
vOTU-168	Actinobacteria (taxid 1760)	NODE_26137_length_4339_cov_8.755514	Blastn
vOTU-2627	Actinobacteria (taxid 1760)	NODE_16048_length_3817_cov_4.877273	Blastn
vOTU-5196	Actinobacteria (taxid 1760)	NODE_16048_length_3817_cov_4.877273	Blastn
vOTU-296	Actinobacteria (taxid 1760)	NODE_7714_length_12684_cov_21.223368	Blastn
vOTU-388	Actinobacteria (taxid 1760)	NODE_8622_length_11420_cov_4.066825	Blastn
vOTU-453	Actinobacteria (taxid 1760)	NODE_8208_length_11978_cov_4.146122	Blastn
vOTU-590	Actinobacteria (taxid 1760)	NODE_35401_length_3421_cov_3.462321	Blastn
vOTU-62	Actinobacteria (taxid 1760)	NODE_40609_length_3085_cov_7.420213	Blastn
vOTU-1406	Actinobacteria (taxid 1760)	NODE_17530_length_3540_cov_26.527866	Blastn
vOTU-3280	Actinobacteria (taxid 1760)	NODE_17530_length_3540_cov_26.527866	Blastn
vOTU-668	Actinobacteria (taxid 1760)	NODE_18287_length_4916_cov_2.830337	Blastn
vOTU-835	Actinobacteria (taxid 1760)	NODE_18287_length_4916_cov_2.830337	Blastn
vOTU-85	Actinobacteria (taxid 1760)	NODE_18287_length_4916_cov_2.830337	Blastn
vOTU-879	Actinobacteria (taxid 1760)	NODE_18287_length_4916_cov_2.830337	Blastn
vOTU-20	Actinobacteria (taxid 1760)	NODE_17566_length_3534_cov_4.326294	Blastn
vOTU-2774	Actinobacteria (taxid 1760)	NODE_16776_length_3680_cov_2.211490	Blastn
vOTU-1069	Actinobacteria (taxid 1760)	NODE_22025_length_2948_cov_4.455242	Blastn
vOTU-232	Actinobacteria (taxid 1760)	NODE_22025_length_2948_cov_4.455242	Blastn
vOTU-2809	Actinobacteria (taxid 1760)	NODE_22025_length_2948_cov_4.455242	Blastn
vOTU-4647	Actinobacteria (taxid 1760)	NODE_22025_length_2948_cov_4.455242	Blastn
vOTU-713	Actinobacteria (taxid 1760)	NODE_22025_length_2948_cov_4.455242	Blastn
vOTU-36	Actinobacteria (taxid 1760)	NODE_26167_length_2584_cov_2.094934	Blastn
vOTU-3913	Actinobacteria (taxid 1760)	NODE_7361_length_7939_cov_3.758586	Blastn
vOTU-1123	Actinobacteria (taxid 1760)	NODE_2287_length_26356_cov_4.756383	Blastn
vOTU-1381	Actinobacteria (taxid 1760)	NODE_2287_length_26356_cov_4.756383	Blastn
vOTU-4459	Actinobacteria (taxid 1760)	NODE_2287_length_26356_cov_4.756383	Blastn
vOTU-531	Actinobacteria (taxid 1760)	NODE_15082_length_4014_cov_3.739141	Blastn
vOTU-6560	Actinobacteria (taxid 1760)	NODE_11581_length_5082_cov_2.942857	Blastn
vOTU-799	Actinobacteria (taxid 1760)	NODE_24717_length_2696_cov_2.514700	Blastn
vOTU-1015	Actinobacteria (taxid 1760)	NODE_45888_length_2618_cov_8.209760	Blastn
vOTU-1114	Actinobacteria (taxid 1760)	NODE_3200_length_26454_cov_3.693369	Blastn
vOTU-307	Actinobacteria (taxid 1760)	NODE_29729_length_3642_cov_2.839832	Blastn
vOTU-361	Actinobacteria (taxid 1760)	NODE_4645_length_18629_cov_4.329668	Blastn
vOTU-424	Actinobacteria (taxid 1760)	NODE_11229_length_8150_cov_6.705438	Blastn
vOTU-424	Actinobacteria (taxid 1760)	NODE_28849_length_3728_cov_5.107642	Blastn
vOTU-603	Actinobacteria (taxid 1760)	NODE_9839_length_9225_cov_7.729668	Blastn
vOTU-1072	Actinobacteria (taxid 1760)	NODE_29345_length_3154_cov_5.515112	Blastn
vOTU-1182	Actinobacteria (taxid 1760)	NODE_29345_length_3154_cov_5.515112	Blastn
vOTU-799	Actinobacteria (taxid 1760)	NODE_2313_length_34680_cov_6.528422	Blastn
vOTU-893	Actinobacteria (taxid 1760)	NODE_42969_length_2750_cov_13.592967	Blastn
vOTU-964	Actinobacteria (taxid 1760)	NODE_38917_length_2967_cov_2.405536	Blastn
vOTU-1030	Actinobacteria (taxid 1760)	NODE_3073_length_19515_cov_24.924272	Blastn
vOTU-1175	Actinobacteria (taxid 1760)	NODE_3073_length_19515_cov_24.924272	Blastn
vOTU-921	Actinobacteria (taxid 1760)	NODE_3073_length_19515_cov_24.924272	Blastn
vOTU-949	Actinobacteria (taxid 1760)	NODE_3073_length_19515_cov_24.924272	Blastn
vOTU-1426	Actinobacteria (taxid 1760)	NODE_4009_length_20896_cov_26.306643	Blastn
vOTU-1139	Actinobacteria (taxid 1760)	NODE_4009_length_20896_cov_26.306643	tRNA
vOTU-1207	Actinobacteria (taxid 1760)	NODE_42693_length_2486_cov_3.906600	tRNA
vOTU-1030	Actinobacteria (taxid 1760)	NODE_4472_length_19312_cov_77.419496	Blastn
vOTU-1175	Actinobacteria (taxid 1760)	NODE_4472_length_19312_cov_77.419496	Blastn
vOTU-921	Actinobacteria (taxid 1760)	NODE_4472_length_19312_cov_77.419496	Blastn
vOTU-949	Actinobacteria (taxid 1760)	NODE_4472_length_19312_cov_77.419496	Blastn
vOTU-1139	Actinobacteria (taxid 1760)	NODE_4676_length_20451_cov_14.541082	tRNA
vOTU-1078	Actinobacteria (taxid 1760)	NODE_6098_length_14047_cov_4.746815	Blastn
vOTU-1202	Actinobacteria (taxid 1760)	NODE_6098_length_14047_cov_4.746815	Blastn
vOTU-1589	Actinobacteria (taxid 1760)	NODE_6098_length_14047_cov_4.746815	Blastn
vOTU-239	Actinobacteria (taxid 1760)	NODE_6098_length_14047_cov_4.746815	Blastn
vOTU-1030	Actinobacteria (taxid 1760)	NODE_6513_length_12685_cov_66.947970	Blastn
vOTU-921	Actinobacteria (taxid 1760)	NODE_6513_length_12685_cov_66.947970	Blastn
vOTU-949	Actinobacteria (taxid 1760)	NODE_6513_length_12685_cov_66.947970	Blastn
vOTU-1202	Actinobacteria (taxid 1760)	NODE_7023_length_11738_cov_4.265586	Blastn
vOTU-1589	Actinobacteria (taxid 1760)	NODE_7023_length_11738_cov_4.265586	Blastn
vOTU-239	Actinobacteria (taxid 1760)	NODE_7023_length_11738_cov_4.265586	Blastn
vOTU-147	Actinobacteria (taxid 1760)	NODE_7461_length_11432_cov_6.560282	Blastn
vOTU-148	Actinobacteria (taxid 1760)	NODE_7461_length_11432_cov_6.560282	Blastn
vOTU-921	Actinobacteria (taxid 1760)	NODE_7710_length_12689_cov_33.477323	Blastn
vOTU-949	Actinobacteria (taxid 1760)	NODE_7710_length_12689_cov_33.477323	Blastn
vOTU-68	Actinobacteria (taxid 1760)	NODE_34211_length_2125_cov_2.772461	tRNA
vOTU-2047	Actinobacteria (taxid 1760)	NODE_7800_length_7441_cov_3.730174	Blastn
vOTU-3568	Actinobacteria (taxid 1760)	NODE_7800_length_7441_cov_3.730174	Blastn
vOTU-5861	Actinobacteria (taxid 1760)	NODE_7800_length_7441_cov_3.730174	Blastn
vOTU-1207	Actinobacteria (taxid 1760)	NODE_4416_length_19551_cov_7.180035	tRNA
vOTU-424	Actinobacteria (taxid 201174)	NODE_8211_length_10416_cov_4.155914	Blastn
vOTU-261	Actinobaculum sp. 313 (taxid 2495645)	NODE_9801_length_5964_cov_5.143367	Blastn
vOTU-261	Actinobaculum sp. 313 (taxid 2495645)	NODE_6329_length_13863_cov_11.055273	Blastn
vOTU-835	Actinomadura amylolytica (taxid 1411117)	NODE_18698_length_3359_cov_2.310481	Blastn
vOTU-1017	Actinomyces (taxid 1654)	NODE_10055_length_5820_cov_7.780951	Blastn
vOTU-1449	Actinomyces israelii (taxid 1659)	NODE_10728_length_8049_cov_5.582790	Blastn
vOTU-603	Actinomyces radicidentis (taxid 111015)	NODE_29160_length_3168_cov_7.527014	Blastn
vOTU-603	Actinomyces radicidentis (taxid 111015)	NODE_21467_length_4279_cov_5.301761	Blastn
vOTU-603	Actinomyces radicidentis (taxid 111015)	NODE_7452_length_7842_cov_7.200773	Blastn
vOTU-249	Actinomyces radicidentis (taxid 111015)	NODE_17735_length_5494_cov_4.519291	Blastn
vOTU-603	Actinomyces radicidentis (taxid 111015)	NODE_22199_length_4585_cov_7.383319	Blastn
vOTU-1069	Actinomyces slackii (taxid 52774)	NODE_26597_length_3973_cov_8.500000	Blastn
vOTU-78	Actinomyces sp. dk561 (taxid 2560010)	NODE_7500_length_12997_cov_11.453560	Blastn
vOTU-1145	Actinomyces sp. dk561 (taxid 2560010)	NODE_2079_length_37860_cov_14.164121	Blastn
vOTU-23	Actinomyces sp. dk561 (taxid 2560010)	NODE_2079_length_37860_cov_14.164121	Blastn
vOTU-374	Actinomyces sp. oral taxon 897 (taxid 2081702)	NODE_22288_length_2924_cov_2.217773	Blastn
vOTU-52	Actinomyces sp. Z16 (taxid 2079536)	NODE_21555_length_5092_cov_45.240279	Blastn
vOTU-844	Actinomyces tangfeifanii (taxid 1912795)	NODE_15448_length_5437_cov_6.805037	Blastn
vOTU-62	Actinomyces tangfeifanii (taxid 1912795)	NODE_18096_length_5893_cov_8.465784	Blastn
vOTU-62	Actinomyces tangfeifanii (taxid 1912795)	NODE_4717_length_12413_cov_4.869731	Blastn
vOTU-1280	Actinomyces tangfeifanii (taxid 1912795)	NODE_25120_length_4159_cov_6.364527	Blastn
vOTU-443	Actinomyces tangfeifanii (taxid 1912795)	NODE_25120_length_4159_cov_6.364527	Blastn
vOTU-505	Actinomyces tangfeifanii (taxid 1912795)	NODE_25120_length_4159_cov_6.364527	Blastn
vOTU-600	Actinomyces tangfeifanii (taxid 1912795)	NODE_25120_length_4159_cov_6.364527	Blastn
vOTU-120	Acutalibacter muris (taxid 1796620)	NODE_20764_length_4829_cov_29.344907	tRNA
vOTU-300	Acutalibacter muris (taxid 1796620)	NODE_20764_length_4829_cov_29.344907	tRNA
vOTU-50	Acutalibacter muris (taxid 1796620)	NODE_20764_length_4829_cov_29.344907	tRNA
vOTU-2466	Adlercreutzia equolifaciens DSM 19450 (taxid 1384484)	NODE_64743_length_1748_cov_2.071813	tRNA
vOTU-2466	Adlercreutzia equolifaciens DSM 19450 (taxid 1384484)	NODE_159207_length_984_cov_2.555678	tRNA
vOTU-2466	Adlercreutzia equolifaciens DSM 19450 (taxid 1384484)	NODE_315080_length_624_cov_2.241316	tRNA
vOTU-2466	Adlercreutzia equolifaciens DSM 19450 (taxid 1384484)	NODE_46700_length_2324_cov_2.943925	tRNA
vOTU-2466	Adlercreutzia equolifaciens DSM 19450 (taxid 1384484)	NODE_268275_length_728_cov_2.221198	tRNA
vOTU-3059	Aeribacillus pallidus (taxid 33936)	NODE_11071_length_7451_cov_4.603336	tRNA
vOTU-3059	Aeribacillus pallidus (taxid 33936)	NODE_11689_length_7855_cov_4.252379	tRNA
vOTU-3004	Aerococcus christensenii (taxid 87541)	NODE_19757_length_4592_cov_3.450720	CRISPR
vOTU-6263	Aerococcus christensenii (taxid 87541)	NODE_19757_length_4592_cov_3.450720	CRISPR
vOTU-977	Aerococcus christensenii (taxid 87541)	NODE_19757_length_4592_cov_3.450720	CRISPR
vOTU-3004	Aerococcus christensenii (taxid 87541)	NODE_301711_length_670_cov_1.959528	CRISPR
vOTU-977	Aerococcus christensenii (taxid 87541)	NODE_301711_length_670_cov_1.959528	CRISPR
vOTU-3682	Aerococcus sanguinicola (taxid 119206)	NODE_354987_length_598_cov_2.969290	tRNA
vOTU-21	Aeromonas (taxid 642)	NODE_37305_length_2620_cov_2.110499	Blastn
vOTU-30	Aeromonas caviae (taxid 648)	NODE_5615_length_14937_cov_12.720525	Blastn
vOTU-63	Aeromonas caviae (taxid 648)	NODE_5615_length_14937_cov_12.720525	Blastn
vOTU-6421	Aeromonas salmonicida (taxid 645)	NODE_11337_length_5184_cov_3.154885	Blastn
vOTU-17	Agarilytica rhodophyticola (taxid 1737490)	NODE_6723_length_12304_cov_6.370900	Blastn
vOTU-17	Agarilytica rhodophyticola (taxid 1737490)	NODE_7764_length_11008_cov_6.144909	Blastn
vOTU-17	Agarilytica rhodophyticola (taxid 1737490)	NODE_6714_length_13098_cov_17.215882	Blastn
vOTU-16	Agarivorans gilvus (taxid 680279)	NODE_21679_length_4671_cov_6.881149	Blastn
vOTU-267	Agrobacterium (taxid 357)	NODE_1799_length_43402_cov_9.359031	Blastn
vOTU-267	Agrobacterium (taxid 357)	NODE_594_length_86100_cov_9.962591	Blastn
vOTU-161	Agrobacterium tumefaciens (taxid 358)	NODE_3716_length_23132_cov_26.128996	Blastn
vOTU-104	Agrobacterium tumefaciens (taxid 358)	NODE_728_length_77130_cov_8.808249	tRNA
vOTU-2	Agrobacterium vitis (taxid 373)	NODE_27966_length_3277_cov_2.207500	Blastn
vOTU-5	Akkermansia muciniphila (taxid 239935)	NODE_1176_length_64428_cov_11.454927	Blastn、tRNA
vOTU-5	Akkermansia muciniphila (taxid 239935)	NODE_13815_length_4335_cov_2.682950	Blastn、CRISPR
vOTU-51	Akkermansia muciniphila (taxid 239935)	NODE_119_length_191532_cov_10.416380	Blastn
vOTU-793	Akkermansia muciniphila (taxid 239935)	NODE_119_length_191532_cov_10.416380	Blastn
vOTU-49	Akkermansia muciniphila (taxid 239935)	NODE_119_length_191532_cov_10.416380	tRNA
vOTU-650	Akkermansia muciniphila (taxid 239935)	NODE_119_length_191532_cov_10.416380	tRNA
vOTU-6	Akkermansia muciniphila (taxid 239935)	NODE_13275_length_4496_cov_2.989138	Blastn、tRNA
vOTU-204	Akkermansia muciniphila (taxid 239935)	NODE_5080_length_16765_cov_2.843061	Blastn
vOTU-6	Akkermansia muciniphila (taxid 239935)	NODE_4876_length_17459_cov_9.768381	Blastn
vOTU-6	Akkermansia muciniphila (taxid 239935)	NODE_8287_length_10334_cov_9.902993	Blastn
vOTU-6	Akkermansia muciniphila (taxid 239935)	NODE_873_length_67213_cov_9.660912	Blastn
vOTU-5	Akkermansia muciniphila (taxid 239935)	NODE_20902_length_3075_cov_2.315210	Blastn、CRISPR
vOTU-5	Akkermansia muciniphila (taxid 239935)	NODE_17080_length_3623_cov_3.140440	Blastn、tRNA
vOTU-5	Akkermansia muciniphila (taxid 239935)	NODE_17677_length_3516_cov_3.042163	Blastn、tRNA
vOTU-5	Akkermansia muciniphila (taxid 239935)	NODE_21067_length_3054_cov_3.318777	Blastn、tRNA
vOTU-5	Akkermansia muciniphila (taxid 239935)	NODE_10528_length_5575_cov_3.710440	Blastn
vOTU-5	Akkermansia muciniphila (taxid 239935)	NODE_11041_length_5324_cov_2.943396	Blastn
vOTU-5	Akkermansia muciniphila (taxid 239935)	NODE_11145_length_5278_cov_2.459719	Blastn
vOTU-5	Akkermansia muciniphila (taxid 239935)	NODE_11206_length_5247_cov_3.209865	Blastn
vOTU-5	Akkermansia muciniphila (taxid 239935)	NODE_11538_length_5098_cov_3.564629	Blastn
vOTU-5	Akkermansia muciniphila (taxid 239935)	NODE_11682_length_5044_cov_3.378699	Blastn
vOTU-5	Akkermansia muciniphila (taxid 239935)	NODE_12201_length_4866_cov_3.641261	Blastn
vOTU-5	Akkermansia muciniphila (taxid 239935)	NODE_12683_length_4691_cov_2.708062	Blastn
vOTU-5	Akkermansia muciniphila (taxid 239935)	NODE_13213_length_4513_cov_2.458747	Blastn
vOTU-5	Akkermansia muciniphila (taxid 239935)	NODE_13654_length_4378_cov_3.204604	Blastn
vOTU-5	Akkermansia muciniphila (taxid 239935)	NODE_13686_length_4369_cov_3.043802	Blastn
vOTU-5	Akkermansia muciniphila (taxid 239935)	NODE_13921_length_4305_cov_2.640728	Blastn
vOTU-5	Akkermansia muciniphila (taxid 239935)	NODE_14382_length_4175_cov_2.790386	Blastn
vOTU-5	Akkermansia muciniphila (taxid 239935)	NODE_14985_length_4036_cov_3.119727	Blastn
vOTU-5	Akkermansia muciniphila (taxid 239935)	NODE_16590_length_3712_cov_2.916644	Blastn
vOTU-5	Akkermansia muciniphila (taxid 239935)	NODE_16689_length_3696_cov_2.994474	Blastn
vOTU-5	Akkermansia muciniphila (taxid 239935)	NODE_16870_length_3662_cov_2.080056	Blastn
vOTU-5	Akkermansia muciniphila (taxid 239935)	NODE_16881_length_3660_cov_3.140106	Blastn
vOTU-5	Akkermansia muciniphila (taxid 239935)	NODE_1803_length_32582_cov_3.181972	Blastn
vOTU-5	Akkermansia muciniphila (taxid 239935)	NODE_19478_length_3247_cov_2.851420	Blastn
vOTU-5	Akkermansia muciniphila (taxid 239935)	NODE_19736_length_3215_cov_2.997769	Blastn
vOTU-5	Akkermansia muciniphila (taxid 239935)	NODE_20026_length_3179_cov_3.263056	Blastn
vOTU-5	Akkermansia muciniphila (taxid 239935)	NODE_2241_length_26801_cov_3.077122	Blastn
vOTU-5	Akkermansia muciniphila (taxid 239935)	NODE_24008_length_2758_cov_2.465871	Blastn
vOTU-5	Akkermansia muciniphila (taxid 239935)	NODE_24460_length_2719_cov_3.255110	Blastn
vOTU-5	Akkermansia muciniphila (taxid 239935)	NODE_25055_length_2667_cov_3.220463	Blastn
vOTU-5	Akkermansia muciniphila (taxid 239935)	NODE_25716_length_2616_cov_3.206774	Blastn
vOTU-5	Akkermansia muciniphila (taxid 239935)	NODE_3016_length_19851_cov_3.272681	Blastn
vOTU-5	Akkermansia muciniphila (taxid 239935)	NODE_3204_length_18611_cov_3.338621	Blastn
vOTU-5	Akkermansia muciniphila (taxid 239935)	NODE_3505_length_17121_cov_3.240319	Blastn
vOTU-5	Akkermansia muciniphila (taxid 239935)	NODE_4458_length_13213_cov_3.095158	Blastn
vOTU-5	Akkermansia muciniphila (taxid 239935)	NODE_4547_length_12934_cov_3.047523	Blastn
vOTU-5	Akkermansia muciniphila (taxid 239935)	NODE_4689_length_12486_cov_3.578935	Blastn
vOTU-5	Akkermansia muciniphila (taxid 239935)	NODE_4881_length_11941_cov_2.656777	Blastn
vOTU-5	Akkermansia muciniphila (taxid 239935)	NODE_5692_length_10224_cov_2.862718	Blastn
vOTU-5	Akkermansia muciniphila (taxid 239935)	NODE_5725_length_10167_cov_2.691179	Blastn
vOTU-5	Akkermansia muciniphila (taxid 239935)	NODE_6176_length_9390_cov_3.479008	Blastn
vOTU-5	Akkermansia muciniphila (taxid 239935)	NODE_6975_length_8334_cov_2.750151	Blastn
vOTU-5	Akkermansia muciniphila (taxid 239935)	NODE_7121_length_8171_cov_2.628490	Blastn
vOTU-5	Akkermansia muciniphila (taxid 239935)	NODE_7178_length_8122_cov_3.140211	Blastn
vOTU-5	Akkermansia muciniphila (taxid 239935)	NODE_7562_length_7711_cov_3.311763	Blastn
vOTU-5	Akkermansia muciniphila (taxid 239935)	NODE_8123_length_7151_cov_2.658326	Blastn
vOTU-5	Akkermansia muciniphila (taxid 239935)	NODE_8345_length_6948_cov_3.121380	Blastn
vOTU-5	Akkermansia muciniphila (taxid 239935)	NODE_8387_length_6917_cov_3.037427	Blastn
vOTU-5	Akkermansia muciniphila (taxid 239935)	NODE_8409_length_6900_cov_3.259563	Blastn
vOTU-5	Akkermansia muciniphila (taxid 239935)	NODE_8688_length_6692_cov_2.520181	Blastn
vOTU-5	Akkermansia muciniphila (taxid 239935)	NODE_8782_length_6620_cov_2.939172	Blastn
vOTU-5	Akkermansia muciniphila (taxid 239935)	NODE_9220_length_6326_cov_2.948312	Blastn
vOTU-5	Akkermansia muciniphila (taxid 239935)	NODE_9284_length_6285_cov_2.982120	Blastn
vOTU-5	Akkermansia muciniphila (taxid 239935)	NODE_9557_length_6110_cov_3.129455	Blastn
vOTU-5	Akkermansia muciniphila (taxid 239935)	NODE_9888_length_5917_cov_3.073116	Blastn
vOTU-51	Akkermansia muciniphila (taxid 239935)	NODE_10279_length_5707_cov_2.932327	Blastn
vOTU-51	Akkermansia muciniphila (taxid 239935)	NODE_11374_length_5163_cov_3.049941	Blastn
vOTU-51	Akkermansia muciniphila (taxid 239935)	NODE_11724_length_5032_cov_3.241372	Blastn
vOTU-51	Akkermansia muciniphila (taxid 239935)	NODE_15777_length_3871_cov_2.932261	Blastn
vOTU-51	Akkermansia muciniphila (taxid 239935)	NODE_17687_length_3514_cov_3.454175	Blastn
vOTU-51	Akkermansia muciniphila (taxid 239935)	NODE_24209_length_2742_cov_2.737336	Blastn
vOTU-51	Akkermansia muciniphila (taxid 239935)	NODE_3094_length_19379_cov_3.125065	Blastn
vOTU-51	Akkermansia muciniphila (taxid 239935)	NODE_4882_length_11938_cov_3.057668	Blastn
vOTU-51	Akkermansia muciniphila (taxid 239935)	NODE_5706_length_10195_cov_3.172761	Blastn
vOTU-51	Akkermansia muciniphila (taxid 239935)	NODE_8858_length_6554_cov_3.708198	Blastn
vOTU-51	Akkermansia muciniphila (taxid 239935)	NODE_9896_length_5911_cov_2.939664	Blastn
vOTU-6	Akkermansia muciniphila (taxid 239935)	NODE_10083_length_5804_cov_2.587917	Blastn
vOTU-6	Akkermansia muciniphila (taxid 239935)	NODE_10103_length_5793_cov_2.705038	Blastn
vOTU-6	Akkermansia muciniphila (taxid 239935)	NODE_10525_length_5577_cov_3.033273	Blastn
vOTU-6	Akkermansia muciniphila (taxid 239935)	NODE_11017_length_5335_cov_2.357550	Blastn
vOTU-6	Akkermansia muciniphila (taxid 239935)	NODE_11286_length_5208_cov_2.630286	Blastn
vOTU-6	Akkermansia muciniphila (taxid 239935)	NODE_11368_length_5168_cov_2.458456	Blastn
vOTU-6	Akkermansia muciniphila (taxid 239935)	NODE_11488_length_5116_cov_2.465569	Blastn
vOTU-6	Akkermansia muciniphila (taxid 239935)	NODE_11611_length_5072_cov_3.570370	Blastn
vOTU-6	Akkermansia muciniphila (taxid 239935)	NODE_11667_length_5049_cov_2.802695	Blastn
vOTU-6	Akkermansia muciniphila (taxid 239935)	NODE_11699_length_5038_cov_2.832493	Blastn
vOTU-6	Akkermansia muciniphila (taxid 239935)	NODE_11787_length_5008_cov_2.747921	Blastn
vOTU-6	Akkermansia muciniphila (taxid 239935)	NODE_11825_length_4994_cov_2.600163	Blastn
vOTU-6	Akkermansia muciniphila (taxid 239935)	NODE_12163_length_4879_cov_2.630779	Blastn
vOTU-6	Akkermansia muciniphila (taxid 239935)	NODE_12715_length_4677_cov_2.276957	Blastn
vOTU-6	Akkermansia muciniphila (taxid 239935)	NODE_13100_length_4546_cov_2.520922	Blastn
vOTU-6	Akkermansia muciniphila (taxid 239935)	NODE_13587_length_4400_cov_2.546149	Blastn
vOTU-6	Akkermansia muciniphila (taxid 239935)	NODE_13768_length_4348_cov_2.479279	Blastn
vOTU-6	Akkermansia muciniphila (taxid 239935)	NODE_13864_length_4320_cov_3.153429	Blastn
vOTU-6	Akkermansia muciniphila (taxid 239935)	NODE_14723_length_4095_cov_2.944749	Blastn
vOTU-6	Akkermansia muciniphila (taxid 239935)	NODE_15123_length_4005_cov_3.095978	Blastn
vOTU-6	Akkermansia muciniphila (taxid 239935)	NODE_15295_length_3970_cov_2.894940	Blastn
vOTU-6	Akkermansia muciniphila (taxid 239935)	NODE_16462_length_3739_cov_2.555161	Blastn
vOTU-6	Akkermansia muciniphila (taxid 239935)	NODE_17082_length_3623_cov_2.369994	Blastn
vOTU-6	Akkermansia muciniphila (taxid 239935)	NODE_17378_length_3569_cov_2.798396	Blastn
vOTU-6	Akkermansia muciniphila (taxid 239935)	NODE_17481_length_3549_cov_2.398041	Blastn
vOTU-6	Akkermansia muciniphila (taxid 239935)	NODE_17573_length_3534_cov_2.630894	Blastn
vOTU-6	Akkermansia muciniphila (taxid 239935)	NODE_19337_length_3269_cov_3.080201	Blastn
vOTU-6	Akkermansia muciniphila (taxid 239935)	NODE_19772_length_3209_cov_3.015645	Blastn
vOTU-6	Akkermansia muciniphila (taxid 239935)	NODE_20203_length_3156_cov_2.516726	Blastn
vOTU-6	Akkermansia muciniphila (taxid 239935)	NODE_20374_length_3135_cov_3.156311	Blastn
vOTU-6	Akkermansia muciniphila (taxid 239935)	NODE_20794_length_3087_cov_3.309635	Blastn
vOTU-6	Akkermansia muciniphila (taxid 239935)	NODE_21048_length_3056_cov_2.629070	Blastn
vOTU-6	Akkermansia muciniphila (taxid 239935)	NODE_21994_length_2952_cov_2.555826	Blastn
vOTU-6	Akkermansia muciniphila (taxid 239935)	NODE_22107_length_2941_cov_2.577514	Blastn
vOTU-6	Akkermansia muciniphila (taxid 239935)	NODE_23059_length_2843_cov_2.881056	Blastn
vOTU-6	Akkermansia muciniphila (taxid 239935)	NODE_23579_length_2796_cov_2.984921	Blastn
vOTU-6	Akkermansia muciniphila (taxid 239935)	NODE_23694_length_2786_cov_2.291251	Blastn
vOTU-6	Akkermansia muciniphila (taxid 239935)	NODE_24628_length_2704_cov_2.733156	Blastn
vOTU-6	Akkermansia muciniphila (taxid 239935)	NODE_25129_length_2661_cov_2.960139	Blastn
vOTU-6	Akkermansia muciniphila (taxid 239935)	NODE_4410_length_13332_cov_2.831158	Blastn
vOTU-6	Akkermansia muciniphila (taxid 239935)	NODE_4455_length_13229_cov_2.798054	Blastn
vOTU-6	Akkermansia muciniphila (taxid 239935)	NODE_4949_length_11760_cov_3.157494	Blastn
vOTU-6	Akkermansia muciniphila (taxid 239935)	NODE_5792_length_10068_cov_2.613452	Blastn
vOTU-6	Akkermansia muciniphila (taxid 239935)	NODE_5897_length_9886_cov_2.754001	Blastn
vOTU-6	Akkermansia muciniphila (taxid 239935)	NODE_6914_length_8417_cov_2.810791	Blastn
vOTU-6	Akkermansia muciniphila (taxid 239935)	NODE_7015_length_8284_cov_3.087364	Blastn
vOTU-6	Akkermansia muciniphila (taxid 239935)	NODE_7502_length_7782_cov_3.313043	Blastn
vOTU-6	Akkermansia muciniphila (taxid 239935)	NODE_7523_length_7758_cov_2.439396	Blastn
vOTU-6	Akkermansia muciniphila (taxid 239935)	NODE_7669_length_7600_cov_2.431743	Blastn
vOTU-6	Akkermansia muciniphila (taxid 239935)	NODE_8292_length_6995_cov_2.925990	Blastn
vOTU-6	Akkermansia muciniphila (taxid 239935)	NODE_8365_length_6932_cov_2.943837	Blastn
vOTU-6	Akkermansia muciniphila (taxid 239935)	NODE_8385_length_6918_cov_2.531209	Blastn
vOTU-6	Akkermansia muciniphila (taxid 239935)	NODE_8441_length_6874_cov_2.521407	Blastn
vOTU-6	Akkermansia muciniphila (taxid 239935)	NODE_8480_length_6844_cov_2.449978	Blastn
vOTU-6	Akkermansia muciniphila (taxid 239935)	NODE_8559_length_6787_cov_2.628763	Blastn
vOTU-6	Akkermansia muciniphila (taxid 239935)	NODE_8584_length_6770_cov_3.209771	Blastn
vOTU-6	Akkermansia muciniphila (taxid 239935)	NODE_8589_length_6766_cov_2.932875	Blastn
vOTU-6	Akkermansia muciniphila (taxid 239935)	NODE_9392_length_6216_cov_3.157029	Blastn
vOTU-6	Akkermansia muciniphila (taxid 239935)	NODE_9747_length_5996_cov_2.915357	Blastn
vOTU-6	Akkermansia muciniphila (taxid 239935)	NODE_9981_length_5863_cov_2.603353	Blastn
vOTU-51	Akkermansia muciniphila (taxid 239935)	NODE_2443_length_24639_cov_3.116440	Blastn
vOTU-49	Akkermansia muciniphila (taxid 239935)	NODE_2443_length_24639_cov_3.116440	tRNA
vOTU-5	Akkermansia muciniphila (taxid 239935)	NODE_6_length_548859_cov_10.407154	Blastn、CRISPR、tRNA
vOTU-6	Akkermansia muciniphila (taxid 239935)	NODE_26_length_308443_cov_14.667171	tRNA
vOTU-835	Akkermansia muciniphila (taxid 239935)	NODE_26_length_308443_cov_14.667171	tRNA
vOTU-6	Akkermansia muciniphila (taxid 239935)	NODE_27_length_315111_cov_9.382911	Blastn、tRNA
vOTU-5	Akkermansia muciniphila (taxid 239935)	NODE_2817_length_21390_cov_3.315301	Blastn、tRNA
vOTU-5	Akkermansia muciniphila (taxid 239935)	NODE_9_length_485194_cov_12.382627	Blastn、CRISPR、tRNA
vOTU-49	Akkermansia muciniphila (taxid 239935)	NODE_3070_length_19518_cov_4.843475	tRNA
vOTU-650	Akkermansia muciniphila (taxid 239935)	NODE_3070_length_19518_cov_4.843475	tRNA
vOTU-5	Akkermansia muciniphila (taxid 239935)	NODE_3521_length_17079_cov_2.785849	Blastn、tRNA
vOTU-6	Akkermansia muciniphila (taxid 239935)	NODE_3715_length_16170_cov_2.915056	Blastn、tRNA
vOTU-51	Akkermansia muciniphila (taxid 239935)	NODE_3758_length_15957_cov_3.070403	Blastn
vOTU-49	Akkermansia muciniphila (taxid 239935)	NODE_3758_length_15957_cov_3.070403	tRNA
vOTU-247	Akkermansia muciniphila (taxid 239935)	NODE_1651_length_46384_cov_47.044291	tRNA
vOTU-49	Akkermansia muciniphila (taxid 239935)	NODE_454464_length_455_cov_1.031746	tRNA
vOTU-835	Akkermansia muciniphila (taxid 239935)	NODE_193596_length_816_cov_1.520974	tRNA
vOTU-51	Akkermansia muciniphila (taxid 239935)	NODE_4301_length_13746_cov_2.897505	Blastn
vOTU-49	Akkermansia muciniphila (taxid 239935)	NODE_4301_length_13746_cov_2.897505	tRNA
vOTU-51	Akkermansia muciniphila (taxid 239935)	NODE_4339_length_13593_cov_3.016573	Blastn
vOTU-793	Akkermansia muciniphila (taxid 239935)	NODE_4339_length_13593_cov_3.016573	Blastn
vOTU-51	Akkermansia muciniphila (taxid 239935)	NODE_4592_length_12786_cov_3.384059	Blastn
vOTU-793	Akkermansia muciniphila (taxid 239935)	NODE_4592_length_12786_cov_3.384059	Blastn
vOTU-49	Akkermansia muciniphila (taxid 239935)	NODE_4592_length_12786_cov_3.384059	tRNA
vOTU-650	Akkermansia muciniphila (taxid 239935)	NODE_4592_length_12786_cov_3.384059	tRNA
vOTU-6	Akkermansia muciniphila (taxid 239935)	NODE_466_length_98392_cov_9.498652	Blastn、tRNA
vOTU-1041	Akkermansia muciniphila (taxid 239935)	NODE_466_length_98392_cov_9.498652	CRISPR
vOTU-6	Akkermansia muciniphila (taxid 239935)	NODE_4776_length_12261_cov_2.794813	Blastn、tRNA
vOTU-6	Akkermansia muciniphila (taxid 239935)	NODE_89_length_212555_cov_12.544776	tRNA
vOTU-51	Akkermansia muciniphila (taxid 239935)	NODE_505_length_106793_cov_12.459022	Blastn
vOTU-793	Akkermansia muciniphila (taxid 239935)	NODE_505_length_106793_cov_12.459022	Blastn
vOTU-49	Akkermansia muciniphila (taxid 239935)	NODE_505_length_106793_cov_12.459022	tRNA
vOTU-650	Akkermansia muciniphila (taxid 239935)	NODE_505_length_106793_cov_12.459022	tRNA
vOTU-5	Akkermansia muciniphila (taxid 239935)	NODE_5088_length_11411_cov_3.428710	Blastn、tRNA
vOTU-835	Akkermansia muciniphila (taxid 239935)	NODE_487_length_96330_cov_12.441960	tRNA
vOTU-51	Akkermansia muciniphila (taxid 239935)	NODE_5122_length_11316_cov_3.623810	Blastn
vOTU-793	Akkermansia muciniphila (taxid 239935)	NODE_5122_length_11316_cov_3.623810	Blastn
vOTU-5	Akkermansia muciniphila (taxid 239935)	NODE_5124_length_11313_cov_2.960662	Blastn、tRNA
vOTU-6	Akkermansia muciniphila (taxid 239935)	NODE_5308_length_10982_cov_2.712425	Blastn、tRNA
vOTU-5	Akkermansia muciniphila (taxid 239935)	NODE_5685_length_10236_cov_3.047150	Blastn、tRNA
vOTU-5	Akkermansia muciniphila (taxid 239935)	NODE_6129_length_9485_cov_3.242241	Blastn、tRNA
vOTU-49	Akkermansia muciniphila (taxid 239935)	NODE_637365_length_357_cov_1.314286	tRNA
vOTU-650	Akkermansia muciniphila (taxid 239935)	NODE_637365_length_357_cov_1.314286	tRNA
vOTU-49	Akkermansia muciniphila (taxid 239935)	NODE_647128_length_353_cov_1.340580	tRNA
vOTU-650	Akkermansia muciniphila (taxid 239935)	NODE_647128_length_353_cov_1.340580	tRNA
vOTU-6	Akkermansia muciniphila (taxid 239935)	NODE_7385_length_7911_cov_2.657774	Blastn、tRNA
vOTU-51	Akkermansia muciniphila (taxid 239935)	NODE_759_length_84724_cov_11.944215	Blastn
vOTU-793	Akkermansia muciniphila (taxid 239935)	NODE_759_length_84724_cov_11.944215	Blastn
vOTU-49	Akkermansia muciniphila (taxid 239935)	NODE_759_length_84724_cov_11.944215	tRNA
vOTU-650	Akkermansia muciniphila (taxid 239935)	NODE_759_length_84724_cov_11.944215	tRNA
vOTU-6	Akkermansia muciniphila (taxid 239935)	NODE_128649_length_905_cov_2.635266	tRNA
vOTU-6	Akkermansia muciniphila (taxid 239935)	NODE_30180_length_2326_cov_2.238773	tRNA
vOTU-6	Akkermansia muciniphila (taxid 239935)	NODE_360749_length_488_cov_2.141119	tRNA
vOTU-6	Akkermansia muciniphila (taxid 239935)	NODE_5027_length_11550_cov_2.965833	tRNA
vOTU-6	Akkermansia muciniphila (taxid 239935)	NODE_8439_length_6875_cov_3.497205	tRNA
vOTU-835	Akkermansia muciniphila (taxid 239935)	NODE_1638_length_35469_cov_3.508392	tRNA
vOTU-6	Akkermansia muciniphila (taxid 239935)	NODE_8_length_529048_cov_11.097828	Blastn、tRNA
vOTU-1041	Akkermansia muciniphila (taxid 239935)	NODE_8_length_529048_cov_11.097828	CRISPR
vOTU-51	Akkermansia muciniphila (taxid 239935)	NODE_8041_length_7227_cov_2.852028	Blastn
vOTU-793	Akkermansia muciniphila (taxid 239935)	NODE_8041_length_7227_cov_2.852028	Blastn
vOTU-49	Akkermansia muciniphila (taxid 239935)	NODE_8041_length_7227_cov_2.852028	tRNA
vOTU-650	Akkermansia muciniphila (taxid 239935)	NODE_8041_length_7227_cov_2.852028	tRNA
vOTU-5	Akkermansia muciniphila (taxid 239935)	NODE_8538_length_6806_cov_3.301085	Blastn、tRNA
vOTU-247	Akkermansia muciniphila (taxid 239935)	NODE_5042_length_17187_cov_109.018644	tRNA
vOTU-6	Akkermansia muciniphila (taxid 239935)	NODE_305277_length_665_cov_0.755102	tRNA
vOTU-49	Akkermansia muciniphila ATCC BAA-835 (taxid 349741)	NODE_398_length_108219_cov_10.113952	tRNA
vOTU-6	Akkermansia muciniphila ATCC BAA-835 (taxid 349741)	NODE_398_length_108219_cov_10.113952	tRNA
vOTU-650	Akkermansia muciniphila ATCC BAA-835 (taxid 349741)	NODE_398_length_108219_cov_10.113952	tRNA
vOTU-49	Akkermansia muciniphila ATCC BAA-835 (taxid 349741)	NODE_490_length_108219_cov_11.700338	tRNA
vOTU-6	Akkermansia muciniphila ATCC BAA-835 (taxid 349741)	NODE_490_length_108219_cov_11.700338	tRNA
vOTU-650	Akkermansia muciniphila ATCC BAA-835 (taxid 349741)	NODE_490_length_108219_cov_11.700338	tRNA
vOTU-13	Alcanivorax pacificus W11-5 (taxid 391936)	NODE_31908_length_2955_cov_2.950660	Blastn
vOTU-2212	Alicyclobacillus acidocaldarius subsp. acidocaldarius DSM 446 (taxid 521098)	NODE_17912_length_3476_cov_2.536923	Blastn
vOTU-445	Alicyclobacillus acidocaldarius subsp. acidocaldarius DSM 446 (taxid 521098)	NODE_17912_length_3476_cov_2.536923	Blastn
vOTU-13	Alienimonas californiensis (taxid 2527989)	NODE_35055_length_3446_cov_5.030276	Blastn
vOTU-345	Alistipes (taxid 239759)	NODE_6289_length_15319_cov_4.642895	Blastn
vOTU-345	Alistipes (taxid 239759)	NODE_2339_length_25722_cov_5.157887	Blastn
vOTU-38	Alistipes (taxid 239759)	NODE_35000_length_2750_cov_2.825664	tRNA
vOTU-74	Alistipes (taxid 239759)	NODE_35000_length_2750_cov_2.825664	tRNA
vOTU-122	Alistipes (taxid 239759)	NODE_3583_length_23417_cov_10.533847	tRNA
vOTU-3356	Alistipes (taxid 239759)	NODE_725827_length_324_cov_71.113360	tRNA
vOTU-122	Alistipes (taxid 239759)	NODE_3538_length_23413_cov_16.005871	tRNA
vOTU-1778	Alistipes (taxid 239759)	NODE_60212_length_1929_cov_15.334233	tRNA
vOTU-122	Alistipes (taxid 239759)	NODE_4043_length_23413_cov_12.888970	tRNA
vOTU-1778	Alistipes (taxid 239759)	NODE_76865_length_1923_cov_3.392741	tRNA
vOTU-1030	Alistipes (taxid 239759)	NODE_579_length_73149_cov_74.101503	CRISPR
vOTU-1275	Alistipes (taxid 239759)	NODE_579_length_73149_cov_74.101503	CRISPR
vOTU-1392	Alistipes (taxid 239759)	NODE_579_length_73149_cov_74.101503	CRISPR
vOTU-1498	Alistipes (taxid 239759)	NODE_579_length_73149_cov_74.101503	CRISPR
vOTU-1679	Alistipes (taxid 239759)	NODE_579_length_73149_cov_74.101503	CRISPR
vOTU-1890	Alistipes (taxid 239759)	NODE_579_length_73149_cov_74.101503	CRISPR
vOTU-238	Alistipes (taxid 239759)	NODE_579_length_73149_cov_74.101503	CRISPR
vOTU-2485	Alistipes (taxid 239759)	NODE_579_length_73149_cov_74.101503	CRISPR
vOTU-295	Alistipes (taxid 239759)	NODE_579_length_73149_cov_74.101503	CRISPR
vOTU-3897	Alistipes (taxid 239759)	NODE_579_length_73149_cov_74.101503	CRISPR
vOTU-4133	Alistipes (taxid 239759)	NODE_579_length_73149_cov_74.101503	CRISPR
vOTU-4590	Alistipes (taxid 239759)	NODE_579_length_73149_cov_74.101503	CRISPR
vOTU-563	Alistipes (taxid 239759)	NODE_579_length_73149_cov_74.101503	CRISPR
vOTU-5798	Alistipes (taxid 239759)	NODE_579_length_73149_cov_74.101503	CRISPR
vOTU-889	Alistipes (taxid 239759)	NODE_579_length_73149_cov_74.101503	CRISPR
vOTU-949	Alistipes (taxid 239759)	NODE_579_length_73149_cov_74.101503	CRISPR
vOTU-3356	Alistipes (taxid 239759)	NODE_456854_length_552_cov_10.823158	tRNA
vOTU-74	Alistipes (taxid 239759)	NODE_117038_length_1425_cov_3.071217	tRNA
vOTU-74	Alistipes (taxid 239759)	NODE_120093_length_1400_cov_2.064248	tRNA
vOTU-122	Alistipes (taxid 239759)	NODE_2587_length_23413_cov_13.837933	tRNA
vOTU-3356	Alistipes (taxid 239759)	NODE_903443_length_303_cov_9.172566	tRNA
vOTU-10	Alistipes communis (taxid 2585118)	NODE_5049_length_16835_cov_4.742511	Blastn
vOTU-882	Alistipes communis (taxid 2585118)	NODE_14746_length_6429_cov_3.640113	Blastn
vOTU-713	Alistipes communis (taxid 2585118)	NODE_14746_length_6429_cov_3.640113	tRNA
vOTU-580	Alistipes communis (taxid 2585118)	NODE_33868_length_3536_cov_2.122290	Blastn
vOTU-580	Alistipes communis (taxid 2585118)	NODE_52855_length_2534_cov_2.126170	Blastn
vOTU-10	Alistipes communis (taxid 2585118)	NODE_18798_length_4574_cov_4.524350	CRISPR
vOTU-1203	Alistipes communis (taxid 2585118)	NODE_18798_length_4574_cov_4.524350	CRISPR
vOTU-1297	Alistipes communis (taxid 2585118)	NODE_18798_length_4574_cov_4.524350	CRISPR
vOTU-791	Alistipes communis (taxid 2585118)	NODE_18798_length_4574_cov_4.524350	CRISPR
vOTU-882	Alistipes communis (taxid 2585118)	NODE_20920_length_3072_cov_2.802003	Blastn
vOTU-882	Alistipes communis (taxid 2585118)	NODE_2834_length_31985_cov_17.465777	Blastn
vOTU-713	Alistipes communis (taxid 2585118)	NODE_2834_length_31985_cov_17.465777	tRNA
vOTU-580	Alistipes communis (taxid 2585118)	NODE_22604_length_4527_cov_2.251236	Blastn
vOTU-82	Alistipes communis (taxid 2585118)	NODE_19228_length_5132_cov_1.817606	Blastn
vOTU-202	Alistipes communis (taxid 2585118)	NODE_388_length_124104_cov_11.170898	tRNA
vOTU-74	Alistipes communis (taxid 2585118)	NODE_3783_length_22801_cov_6.003565	tRNA
vOTU-9	Alistipes communis (taxid 2585118)	NODE_67704_length_1964_cov_3.217806	tRNA
vOTU-10	Alistipes dispar (taxid 2585119)	NODE_10833_length_7615_cov_4.580393	Blastn
vOTU-10	Alistipes dispar (taxid 2585119)	NODE_13073_length_6366_cov_4.816823	Blastn
vOTU-10	Alistipes dispar (taxid 2585119)	NODE_2406_length_33793_cov_4.610511	Blastn
vOTU-10	Alistipes dispar (taxid 2585119)	NODE_3490_length_24095_cov_4.882546	Blastn
vOTU-10	Alistipes dispar (taxid 2585119)	NODE_4101_length_20322_cov_4.622820	Blastn
vOTU-10	Alistipes dispar (taxid 2585119)	NODE_4696_length_17730_cov_5.080440	Blastn
vOTU-10	Alistipes dispar (taxid 2585119)	NODE_5427_length_15468_cov_4.864336	Blastn
vOTU-10	Alistipes dispar (taxid 2585119)	NODE_5780_length_14443_cov_4.635946	Blastn
vOTU-10	Alistipes dispar (taxid 2585119)	NODE_6720_length_12310_cov_4.849996	Blastn
vOTU-10	Alistipes dispar (taxid 2585119)	NODE_6749_length_12260_cov_4.863088	Blastn
vOTU-10	Alistipes dispar (taxid 2585119)	NODE_7019_length_11742_cov_4.911616	Blastn
vOTU-10	Alistipes dispar (taxid 2585119)	NODE_7722_length_10671_cov_4.832075	Blastn
vOTU-10	Alistipes dispar (taxid 2585119)	NODE_8529_length_9697_cov_4.508420	Blastn
vOTU-10	Alistipes dispar (taxid 2585119)	NODE_8559_length_9660_cov_4.821142	Blastn
vOTU-10	Alistipes dispar (taxid 2585119)	NODE_11_length_402549_cov_20.448747	Blastn
vOTU-9	Alistipes dispar (taxid 2585119)	NODE_11_length_402549_cov_20.448747	tRNA
vOTU-10	Alistipes dispar (taxid 2585119)	NODE_12_length_332373_cov_8.448546	Blastn
vOTU-9	Alistipes dispar (taxid 2585119)	NODE_12_length_332373_cov_8.448546	tRNA
vOTU-82	Alistipes dispar (taxid 2585119)	NODE_6120_length_13587_cov_3.851443	Blastn
vOTU-82	Alistipes dispar (taxid 2585119)	NODE_126_length_146964_cov_12.855481	Blastn
vOTU-74	Alistipes dispar (taxid 2585119)	NODE_126_length_146964_cov_12.855481	tRNA
vOTU-345	Alistipes dispar (taxid 2585119)	NODE_1199_length_54780_cov_5.753469	Blastn
vOTU-10	Alistipes dispar (taxid 2585119)	NODE_1812_length_42664_cov_8.271844	Blastn
vOTU-9	Alistipes dispar (taxid 2585119)	NODE_1812_length_42664_cov_8.271844	tRNA
vOTU-10	Alistipes dispar (taxid 2585119)	NODE_9962_length_5875_cov_3.190928	Blastn
vOTU-82	Alistipes dispar (taxid 2585119)	NODE_222_length_146950_cov_15.819075	Blastn
vOTU-74	Alistipes dispar (taxid 2585119)	NODE_222_length_146950_cov_15.819075	tRNA
vOTU-10	Alistipes dispar (taxid 2585119)	NODE_14504_length_6517_cov_3.671118	Blastn
vOTU-10	Alistipes dispar (taxid 2585119)	NODE_9054_length_9926_cov_4.338715	Blastn
vOTU-82	Alistipes dispar (taxid 2585119)	NODE_259_length_146950_cov_19.049260	Blastn
vOTU-74	Alistipes dispar (taxid 2585119)	NODE_259_length_146950_cov_19.049260	tRNA
vOTU-345	Alistipes dispar (taxid 2585119)	NODE_1247_length_55449_cov_9.187640	Blastn
vOTU-791	Alistipes dispar (taxid 2585119)	NODE_1996_length_39013_cov_10.567264	Blastn
vOTU-10	Alistipes dispar (taxid 2585119)	NODE_338_length_130549_cov_21.779087	Blastn
vOTU-9	Alistipes dispar (taxid 2585119)	NODE_338_length_130549_cov_21.779087	tRNA
vOTU-10	Alistipes dispar (taxid 2585119)	NODE_4045_length_20611_cov_4.606945	Blastn
vOTU-9	Alistipes dispar (taxid 2585119)	NODE_4045_length_20611_cov_4.606945	tRNA
vOTU-10	Alistipes dispar (taxid 2585119)	NODE_4491_length_18523_cov_4.334110	Blastn
vOTU-9	Alistipes dispar (taxid 2585119)	NODE_4491_length_18523_cov_4.334110	tRNA
vOTU-10	Alistipes dispar (taxid 2585119)	NODE_49_length_270968_cov_22.466032	Blastn
vOTU-9	Alistipes dispar (taxid 2585119)	NODE_49_length_270968_cov_22.466032	tRNA
vOTU-10	Alistipes dispar (taxid 2585119)	NODE_5870_length_14163_cov_4.324294	Blastn
vOTU-9	Alistipes dispar (taxid 2585119)	NODE_5870_length_14163_cov_4.324294	tRNA
vOTU-10	Alistipes dispar (taxid 2585119)	NODE_6_length_402032_cov_15.736742	Blastn
vOTU-9	Alistipes dispar (taxid 2585119)	NODE_6_length_402032_cov_15.736742	tRNA
vOTU-74	Alistipes dispar (taxid 2585119)	NODE_97885_length_1618_cov_1.767683	tRNA
vOTU-768	Alistipes dispar (taxid 2585119)	NODE_93_length_209236_cov_18.479769	Blastn
vOTU-971	Alistipes dispar (taxid 2585119)	NODE_93_length_209236_cov_18.479769	Blastn
vOTU-632	Alistipes dispar (taxid 2585119)	NODE_93_length_209236_cov_18.479769	tRNA
vOTU-10	Alistipes finegoldii DSM 17242 (taxid 679935)	NODE_10265_length_8382_cov_4.218784	Blastn
vOTU-768	Alistipes finegoldii DSM 17242 (taxid 679935)	NODE_1348_length_41510_cov_16.403809	Blastn
vOTU-971	Alistipes finegoldii DSM 17242 (taxid 679935)	NODE_1348_length_41510_cov_16.403809	Blastn
vOTU-632	Alistipes finegoldii DSM 17242 (taxid 679935)	NODE_1348_length_41510_cov_16.403809	tRNA
vOTU-791	Alistipes finegoldii DSM 17242 (taxid 679935)	NODE_6895_length_12390_cov_3.899781	Blastn
vOTU-768	Alistipes finegoldii DSM 17242 (taxid 679935)	NODE_1494_length_50138_cov_6.005973	Blastn
vOTU-971	Alistipes finegoldii DSM 17242 (taxid 679935)	NODE_1494_length_50138_cov_6.005973	Blastn
vOTU-632	Alistipes finegoldii DSM 17242 (taxid 679935)	NODE_1494_length_50138_cov_6.005973	tRNA
vOTU-377	Alistipes finegoldii DSM 17242 (taxid 679935)	NODE_46282_length_2796_cov_2.157043	Blastn
vOTU-768	Alistipes finegoldii DSM 17242 (taxid 679935)	NODE_2213_length_35993_cov_10.603408	Blastn
vOTU-971	Alistipes finegoldii DSM 17242 (taxid 679935)	NODE_2213_length_35993_cov_10.603408	Blastn
vOTU-632	Alistipes finegoldii DSM 17242 (taxid 679935)	NODE_2213_length_35993_cov_10.603408	tRNA
vOTU-82	Alistipes finegoldii DSM 17242 (taxid 679935)	NODE_14136_length_4248_cov_3.141693	Blastn
vOTU-10	Alistipes finegoldii DSM 17242 (taxid 679935)	NODE_2777_length_29950_cov_4.642286	Blastn
vOTU-9	Alistipes finegoldii DSM 17242 (taxid 679935)	NODE_2777_length_29950_cov_4.642286	tRNA
vOTU-377	Alistipes finegoldii DSM 17242 (taxid 679935)	NODE_14603_length_6482_cov_4.540359	Blastn
vOTU-377	Alistipes finegoldii DSM 17242 (taxid 679935)	NODE_22777_length_4499_cov_3.512890	Blastn
vOTU-439	Alistipes finegoldii DSM 17242 (taxid 679935)	NODE_5422_length_16094_cov_5.248236	Blastn
vOTU-102	Alistipes finegoldii DSM 17242 (taxid 679935)	NODE_2983_length_27355_cov_52.957548	tRNA
vOTU-344	Alistipes finegoldii DSM 17242 (taxid 679935)	NODE_2983_length_27355_cov_52.957548	tRNA
vOTU-102	Alistipes finegoldii DSM 17242 (taxid 679935)	NODE_3011_length_27639_cov_78.162942	tRNA
vOTU-344	Alistipes finegoldii DSM 17242 (taxid 679935)	NODE_3011_length_27639_cov_78.162942	tRNA
vOTU-102	Alistipes finegoldii DSM 17242 (taxid 679935)	NODE_3425_length_27031_cov_15.286785	tRNA
vOTU-344	Alistipes finegoldii DSM 17242 (taxid 679935)	NODE_3425_length_27031_cov_15.286785	tRNA
vOTU-102	Alistipes finegoldii DSM 17242 (taxid 679935)	NODE_3439_length_24832_cov_61.728620	tRNA
vOTU-344	Alistipes finegoldii DSM 17242 (taxid 679935)	NODE_3439_length_24832_cov_61.728620	tRNA
vOTU-74	Alistipes finegoldii DSM 17242 (taxid 679935)	NODE_5510_length_15224_cov_3.759820	tRNA
vOTU-233	Alistipes indistinctus (taxid 626932)	NODE_580_length_73148_cov_13.473375	Blastn
vOTU-198	Alistipes indistinctus (taxid 626932)	NODE_580_length_73148_cov_13.473375	tRNA
vOTU-10	Alistipes megaguti (taxid 2364787)	NODE_19529_length_4427_cov_4.189885	Blastn
vOTU-10	Alistipes megaguti (taxid 2364787)	NODE_38176_length_2575_cov_4.554043	Blastn
vOTU-10	Alistipes megaguti (taxid 2364787)	NODE_4873_length_17148_cov_4.762638	Blastn
vOTU-10	Alistipes megaguti (taxid 2364787)	NODE_5895_length_14114_cov_4.628696	Blastn
vOTU-122	Alistipes megaguti (taxid 2364787)	NODE_18502_length_5300_cov_3.368562	Blastn
vOTU-122	Alistipes megaguti (taxid 2364787)	NODE_3242_length_25761_cov_88.883624	tRNA
vOTU-122	Alistipes megaguti (taxid 2364787)	NODE_934_length_68397_cov_9.233343	tRNA
vOTU-1221	Alistipes megaguti (taxid 2364787)	NODE_3084_length_27119_cov_10.223615	tRNA
vOTU-122	Alistipes megaguti (taxid 2364787)	NODE_3216_length_25613_cov_41.128015	tRNA
vOTU-122	Alistipes megaguti (taxid 2364787)	NODE_853_length_68560_cov_16.587211	tRNA
vOTU-1221	Alistipes megaguti (taxid 2364787)	NODE_3022_length_27119_cov_19.488314	tRNA
vOTU-3356	Alistipes megaguti (taxid 2364787)	NODE_5061_length_16797_cov_45.345993	tRNA
vOTU-122	Alistipes megaguti (taxid 2364787)	NODE_1060_length_68397_cov_20.459778	tRNA
vOTU-122	Alistipes megaguti (taxid 2364787)	NODE_3628_length_25617_cov_107.332459	tRNA
vOTU-1221	Alistipes megaguti (taxid 2364787)	NODE_3413_length_27119_cov_13.952370	tRNA
vOTU-122	Alistipes megaguti (taxid 2364787)	NODE_2351_length_25617_cov_72.112060	tRNA
vOTU-122	Alistipes megaguti (taxid 2364787)	NODE_651_length_68396_cov_12.451792	tRNA
vOTU-1221	Alistipes megaguti (taxid 2364787)	NODE_2219_length_27120_cov_14.393447	tRNA
vOTU-9	Alistipes megaguti (taxid 2364787)	NODE_95823_length_1081_cov_2.790837	tRNA
vOTU-122	Alistipes megaguti (taxid 2364787)	NODE_3309_length_25652_cov_114.465455	tRNA
vOTU-122	Alistipes megaguti (taxid 2364787)	NODE_880_length_68560_cov_27.065943	tRNA
vOTU-1221	Alistipes megaguti (taxid 2364787)	NODE_3121_length_27118_cov_12.854998	tRNA
vOTU-9	Alistipes megaguti (taxid 2364787)	NODE_23249_length_4428_cov_4.169386	tRNA
vOTU-10	Alistipes onderdonkii subsp. vulgaris (taxid 2585117)	NODE_21870_length_4011_cov_4.317743	Blastn
vOTU-791	Alistipes onderdonkii subsp. vulgaris (taxid 2585117)	NODE_6270_length_13229_cov_5.319647	Blastn
vOTU-945	Alistipes onderdonkii subsp. vulgaris (taxid 2585117)	NODE_2818_length_29499_cov_6.766909	Blastn
vOTU-945	Alistipes onderdonkii subsp. vulgaris (taxid 2585117)	NODE_2735_length_29323_cov_5.924947	Blastn
vOTU-377	Alistipes onderdonkii subsp. vulgaris (taxid 2585117)	NODE_49871_length_2642_cov_2.592593	Blastn
vOTU-791	Alistipes onderdonkii subsp. vulgaris (taxid 2585117)	NODE_143_length_188114_cov_21.578413	Blastn
vOTU-945	Alistipes onderdonkii subsp. vulgaris (taxid 2585117)	NODE_2093_length_28398_cov_5.383390	Blastn
vOTU-945	Alistipes onderdonkii subsp. vulgaris (taxid 2585117)	NODE_2709_length_30484_cov_10.579603	Blastn
vOTU-122	Alistipes onderdonkii subsp. vulgaris (taxid 2585117)	NODE_3762_length_22337_cov_9.270934	tRNA
vOTU-302	Alistipes onderdonkii subsp. vulgaris (taxid 2585117)	NODE_4238_length_20307_cov_4.149382	Blastn
vOTU-589	Alistipes onderdonkii subsp. vulgaris (taxid 2585117)	NODE_4238_length_20307_cov_4.149382	Blastn
vOTU-889	Alistipes onderdonkii subsp. vulgaris (taxid 2585117)	NODE_4238_length_20307_cov_4.149382	Blastn
vOTU-302	Alistipes onderdonkii subsp. vulgaris (taxid 2585117)	NODE_4742_length_17894_cov_3.892125	Blastn
vOTU-589	Alistipes onderdonkii subsp. vulgaris (taxid 2585117)	NODE_4742_length_17894_cov_3.892125	Blastn
vOTU-38	Alistipes onderdonkii subsp. vulgaris (taxid 2585117)	NODE_2663_length_29971_cov_23.543286	tRNA
vOTU-122	Alistipes onderdonkii subsp. vulgaris (taxid 2585117)	NODE_2982_length_30553_cov_8.166328	tRNA
vOTU-302	Alistipes onderdonkii subsp. vulgaris (taxid 2585117)	NODE_6038_length_9628_cov_3.606324	Blastn
vOTU-589	Alistipes onderdonkii subsp. vulgaris (taxid 2585117)	NODE_6038_length_9628_cov_3.606324	Blastn
vOTU-889	Alistipes onderdonkii subsp. vulgaris (taxid 2585117)	NODE_6038_length_9628_cov_3.606324	Blastn
vOTU-122	Alistipes onderdonkii subsp. vulgaris (taxid 2585117)	NODE_1912_length_30651_cov_4.948845	tRNA
vOTU-9	Alistipes onderdonkii subsp. vulgaris (taxid 2585117)	NODE_12433_length_7431_cov_4.488306	tRNA
vOTU-10	Alistipes shahii WAL 8301 (taxid 717959)	NODE_19995_length_4336_cov_3.877671	Blastn
vOTU-10	Alistipes shahii WAL 8301 (taxid 717959)	NODE_2937_length_28328_cov_4.151287	Blastn
vOTU-10	Alistipes shahii WAL 8301 (taxid 717959)	NODE_36446_length_2665_cov_3.253478	Blastn
vOTU-10	Alistipes shahii WAL 8301 (taxid 717959)	NODE_6551_length_12622_cov_4.640574	Blastn
vOTU-1030	Alistipes shahii WAL 8301 (taxid 717959)	NODE_11306_length_7301_cov_70.441584	Blastn
vOTU-1175	Alistipes shahii WAL 8301 (taxid 717959)	NODE_11306_length_7301_cov_70.441584	Blastn
vOTU-921	Alistipes shahii WAL 8301 (taxid 717959)	NODE_11306_length_7301_cov_70.441584	Blastn
vOTU-949	Alistipes shahii WAL 8301 (taxid 717959)	NODE_11306_length_7301_cov_70.441584	Blastn
vOTU-404	Alistipes shahii WAL 8301 (taxid 717959)	NODE_6568_length_12583_cov_3.997121	Blastn
vOTU-1175	Alistipes shahii WAL 8301 (taxid 717959)	NODE_12202_length_4865_cov_95.471387	Blastn
vOTU-1291	Alistipes shahii WAL 8301 (taxid 717959)	NODE_12202_length_4865_cov_95.471387	Blastn
vOTU-949	Alistipes shahii WAL 8301 (taxid 717959)	NODE_12202_length_4865_cov_95.471387	Blastn
vOTU-266	Alistipes shahii WAL 8301 (taxid 717959)	NODE_11982_length_7243_cov_4.640385	Blastn
vOTU-1030	Alistipes shahii WAL 8301 (taxid 717959)	NODE_13827_length_6787_cov_84.111177	Blastn
vOTU-921	Alistipes shahii WAL 8301 (taxid 717959)	NODE_13827_length_6787_cov_84.111177	Blastn
vOTU-404	Alistipes shahii WAL 8301 (taxid 717959)	NODE_1381_length_50013_cov_30.682153	Blastn
vOTU-404	Alistipes shahii WAL 8301 (taxid 717959)	NODE_1446_length_50367_cov_8.715431	Blastn
vOTU-102	Alistipes shahii WAL 8301 (taxid 717959)	NODE_1446_length_50367_cov_8.715431	tRNA
vOTU-344	Alistipes shahii WAL 8301 (taxid 717959)	NODE_1446_length_50367_cov_8.715431	tRNA
vOTU-791	Alistipes shahii WAL 8301 (taxid 717959)	NODE_333_length_120341_cov_20.754972	Blastn
vOTU-10	Alistipes shahii WAL 8301 (taxid 717959)	NODE_20743_length_5263_cov_2.890282	Blastn
vOTU-122	Alistipes shahii WAL 8301 (taxid 717959)	NODE_30276_length_3863_cov_2.758584	Blastn
vOTU-149	Alistipes shahii WAL 8301 (taxid 717959)	NODE_29563_length_3933_cov_2.356328	Blastn
vOTU-266	Alistipes shahii WAL 8301 (taxid 717959)	NODE_26213_length_4330_cov_3.816600	Blastn
vOTU-404	Alistipes shahii WAL 8301 (taxid 717959)	NODE_1672_length_50066_cov_13.713337	Blastn
vOTU-945	Alistipes shahii WAL 8301 (taxid 717959)	NODE_5168_length_18459_cov_5.334947	Blastn
vOTU-949	Alistipes shahii WAL 8301 (taxid 717959)	NODE_32779_length_3627_cov_32.740563	Blastn
vOTU-768	Alistipes shahii WAL 8301 (taxid 717959)	NODE_20_length_330197_cov_21.629938	Blastn
vOTU-971	Alistipes shahii WAL 8301 (taxid 717959)	NODE_20_length_330197_cov_21.629938	Blastn
vOTU-632	Alistipes shahii WAL 8301 (taxid 717959)	NODE_20_length_330197_cov_21.629938	tRNA
vOTU-266	Alistipes shahii WAL 8301 (taxid 717959)	NODE_8084_length_7186_cov_4.864538	Blastn
vOTU-404	Alistipes shahii WAL 8301 (taxid 717959)	NODE_2330_length_25845_cov_4.180146	Blastn
vOTU-82	Alistipes shahii WAL 8301 (taxid 717959)	NODE_2371_length_34027_cov_6.262386	Blastn
vOTU-74	Alistipes shahii WAL 8301 (taxid 717959)	NODE_2371_length_34027_cov_6.262386	tRNA
vOTU-791	Alistipes shahii WAL 8301 (taxid 717959)	NODE_187_length_128657_cov_15.060810	Blastn
vOTU-1177	Alistipes shahii WAL 8301 (taxid 717959)	NODE_6981_length_12609_cov_9.067986	Blastn
vOTU-439	Alistipes shahii WAL 8301 (taxid 717959)	NODE_7342_length_12069_cov_7.170447	Blastn
vOTU-1203	Alistipes shahii WAL 8301 (taxid 717959)	NODE_313_length_118077_cov_7.093932	CRISPR
vOTU-1297	Alistipes shahii WAL 8301 (taxid 717959)	NODE_313_length_118077_cov_7.093932	CRISPR
vOTU-1175	Alistipes shahii WAL 8301 (taxid 717959)	NODE_386_length_91084_cov_82.488809	Blastn
vOTU-1291	Alistipes shahii WAL 8301 (taxid 717959)	NODE_386_length_91084_cov_82.488809	Blastn
vOTU-10	Alistipes shahii WAL 8301 (taxid 717959)	NODE_4523_length_19103_cov_8.182277	Blastn
vOTU-9	Alistipes shahii WAL 8301 (taxid 717959)	NODE_4523_length_19103_cov_8.182277	tRNA
vOTU-1177	Alistipes shahii WAL 8301 (taxid 717959)	NODE_4614_length_12720_cov_7.227003	Blastn
vOTU-3833	Alistipes shahii WAL 8301 (taxid 717959)	NODE_4614_length_12720_cov_7.227003	Blastn
vOTU-1175	Alistipes shahii WAL 8301 (taxid 717959)	NODE_496_length_94604_cov_157.042739	Blastn
vOTU-1291	Alistipes shahii WAL 8301 (taxid 717959)	NODE_496_length_94604_cov_157.042739	Blastn
vOTU-921	Alistipes shahii WAL 8301 (taxid 717959)	NODE_496_length_94604_cov_157.042739	Blastn
vOTU-949	Alistipes shahii WAL 8301 (taxid 717959)	NODE_496_length_94604_cov_157.042739	Blastn
vOTU-404	Alistipes shahii WAL 8301 (taxid 717959)	NODE_6061_length_13731_cov_3.630951	Blastn
vOTU-102	Alistipes shahii WAL 8301 (taxid 717959)	NODE_6061_length_13731_cov_3.630951	tRNA
vOTU-344	Alistipes shahii WAL 8301 (taxid 717959)	NODE_6061_length_13731_cov_3.630951	tRNA
vOTU-1175	Alistipes shahii WAL 8301 (taxid 717959)	NODE_6346_length_13046_cov_132.832061	Blastn
vOTU-1177	Alistipes shahii WAL 8301 (taxid 717959)	NODE_6346_length_13046_cov_132.832061	Blastn
vOTU-1291	Alistipes shahii WAL 8301 (taxid 717959)	NODE_6346_length_13046_cov_132.832061	Blastn
vOTU-921	Alistipes shahii WAL 8301 (taxid 717959)	NODE_6346_length_13046_cov_132.832061	Blastn
vOTU-949	Alistipes shahii WAL 8301 (taxid 717959)	NODE_6346_length_13046_cov_132.832061	Blastn
vOTU-9	Alistipes shahii WAL 8301 (taxid 717959)	NODE_24365_length_4593_cov_4.655226	tRNA
vOTU-9	Alistipes shahii WAL 8301 (taxid 717959)	NODE_70160_length_2051_cov_2.582573	tRNA
vOTU-404	Alistipes shahii WAL 8301 (taxid 717959)	NODE_7358_length_7940_cov_4.123108	Blastn
vOTU-102	Alistipes shahii WAL 8301 (taxid 717959)	NODE_7358_length_7940_cov_4.123108	tRNA
vOTU-344	Alistipes shahii WAL 8301 (taxid 717959)	NODE_7358_length_7940_cov_4.123108	tRNA
vOTU-38	Alistipes shahii WAL 8301 (taxid 717959)	NODE_10700_length_5482_cov_5.555227	tRNA
vOTU-1175	Alistipes shahii WAL 8301 (taxid 717959)	NODE_9281_length_9260_cov_36.254383	Blastn
vOTU-1177	Alistipes shahii WAL 8301 (taxid 717959)	NODE_9281_length_9260_cov_36.254383	Blastn
vOTU-1291	Alistipes shahii WAL 8301 (taxid 717959)	NODE_9281_length_9260_cov_36.254383	Blastn
vOTU-921	Alistipes shahii WAL 8301 (taxid 717959)	NODE_9281_length_9260_cov_36.254383	Blastn
vOTU-949	Alistipes shahii WAL 8301 (taxid 717959)	NODE_9281_length_9260_cov_36.254383	Blastn
vOTU-9	Alistipes shahii WAL 8301 (taxid 717959)	NODE_21067_length_4772_cov_4.690522	tRNA
vOTU-9	Alistipes shahii WAL 8301 (taxid 717959)	NODE_25673_length_4089_cov_3.186191	tRNA
vOTU-613	Alkaliphilus metalliredigens QYMF (taxid 293826)	NODE_7014_length_11755_cov_3.662956	Blastn
vOTU-18	Alkaliphilus metalliredigens QYMF (taxid 293826)	NODE_6445_length_13284_cov_4.402362	Blastn
vOTU-613	Alkaliphilus metalliredigens QYMF (taxid 293826)	NODE_20020_length_4537_cov_3.632735	Blastn
vOTU-613	Alkaliphilus metalliredigens QYMF (taxid 293826)	NODE_2189_length_40107_cov_10.799076	Blastn
vOTU-613	Alkaliphilus metalliredigens QYMF (taxid 293826)	NODE_3231_length_18440_cov_5.679900	Blastn
vOTU-978	Alkaliphilus metalliredigens QYMF (taxid 293826)	NODE_7729_length_7533_cov_3.348981	Blastn
vOTU-613	Alkaliphilus metalliredigens QYMF (taxid 293826)	NODE_1936_length_40107_cov_11.603947	Blastn
vOTU-42	Alkaliphilus oremlandii OhILAs (taxid 350688)	NODE_3522_length_23915_cov_8.771457	Blastn
vOTU-42	Alkaliphilus oremlandii OhILAs (taxid 350688)	NODE_3925_length_23990_cov_8.447079	Blastn
vOTU-42	Alkaliphilus oremlandii OhILAs (taxid 350688)	NODE_2517_length_23944_cov_12.243851	Blastn
vOTU-42	Alkaliphilus oremlandii OhILAs (taxid 350688)	NODE_3578_length_23942_cov_9.162539	Blastn
vOTU-1216	Allochromatium vinosum DSM 180 (taxid 572477)	NODE_33963_length_2813_cov_5.927632	Blastn
vOTU-1216	Allochromatium vinosum DSM 180 (taxid 572477)	NODE_3336_length_24612_cov_6.481353	Blastn
vOTU-1216	Allochromatium vinosum DSM 180 (taxid 572477)	NODE_23375_length_2813_cov_5.888158	Blastn
vOTU-1216	Allochromatium vinosum DSM 180 (taxid 572477)	NODE_41677_length_2813_cov_10.411184	Blastn
vOTU-453	Alloprevotella sp. E39 (taxid 2133944)	NODE_12293_length_6737_cov_4.846997	Blastn
vOTU-453	Alloprevotella sp. E39 (taxid 2133944)	NODE_45415_length_2836_cov_3.466111	Blastn
vOTU-945	Alloprevotella sp. E39 (taxid 2133944)	NODE_10366_length_9637_cov_5.908891	Blastn
vOTU-2813	Alloprevotella sp. E39 (taxid 2133944)	NODE_8368_length_6927_cov_13.985109	Blastn
vOTU-3402	Alloprevotella sp. E39 (taxid 2133944)	NODE_6399_length_9043_cov_10.315414	Blastn
vOTU-453	Alloprevotella sp. E39 (taxid 2133944)	NODE_8973_length_6475_cov_4.151766	Blastn
vOTU-453	Alloprevotella sp. E39 (taxid 2133944)	NODE_13951_length_6738_cov_2.694490	Blastn
vOTU-1538	Alloprevotella sp. E39 (taxid 2133944)	NODE_4380_length_19295_cov_4.160787	Blastn
vOTU-922	Alloprevotella sp. E39 (taxid 2133944)	NODE_4380_length_19295_cov_4.160787	Blastn
vOTU-1221	Alloprevotella sp. E39 (taxid 2133944)	NODE_4380_length_19295_cov_4.160787	tRNA
vOTU-1538	Alloprevotella sp. E39 (taxid 2133944)	NODE_4963_length_11733_cov_3.468771	Blastn
vOTU-1221	Alloprevotella sp. E39 (taxid 2133944)	NODE_4963_length_11733_cov_3.468771	tRNA
vOTU-182	Alphaproteobacteria (taxid 28211)	NODE_12981_length_6407_cov_7.084992	Blastn
vOTU-20	Alphaproteobacteria (taxid 28211)	NODE_31802_length_2964_cov_2.527537	Blastn
vOTU-393	Alphaproteobacteria (taxid 28211)	NODE_13805_length_6027_cov_4.309916	Blastn
vOTU-679	Alphaproteobacteria (taxid 28211)	NODE_15685_length_5356_cov_4.080318	Blastn
vOTU-54	Alphaproteobacteria (taxid 28211)	NODE_23806_length_3941_cov_6.549948	Blastn
vOTU-936	Alphaproteobacteria (taxid 28211)	NODE_9552_length_9001_cov_2.991932	Blastn
vOTU-603	Alphaproteobacteria (taxid 28211)	NODE_27884_length_4116_cov_9.102501	Blastn
vOTU-345	Alphaproteobacteria (taxid 28211)	NODE_1704_length_34130_cov_5.267730	Blastn
vOTU-589	Alphaproteobacteria (taxid 28211)	NODE_22291_length_4570_cov_3.908079	Blastn
vOTU-889	Alphaproteobacteria (taxid 28211)	NODE_22291_length_4570_cov_3.908079	Blastn
vOTU-453	Alphaproteobacteria (taxid 28211)	NODE_1848_length_31671_cov_4.942014	Blastn
vOTU-603	Alphaproteobacteria (taxid 28211)	NODE_6634_length_8761_cov_6.693114	Blastn
vOTU-5400	Alphaproteobacteria (taxid 28211)	NODE_1408_length_56413_cov_7.763686	CRISPR
vOTU-1098	Alphaproteobacteria (taxid 28211)	NODE_348126_length_547_cov_1.810638	CRISPR
vOTU-2599	Alphaproteobacteria (taxid 28211)	NODE_348126_length_547_cov_1.810638	CRISPR
vOTU-3104	Alphaproteobacteria (taxid 28211)	NODE_348126_length_547_cov_1.810638	CRISPR
vOTU-4228	Alphaproteobacteria (taxid 28211)	NODE_348126_length_547_cov_1.810638	CRISPR
vOTU-3566	Alphaproteobacteria (taxid 28211)	NODE_164496_length_913_cov_2.064593	tRNA
vOTU-1392	Alphaproteobacteria (taxid 28211)	NODE_5756_length_10121_cov_3.237853	Blastn
vOTU-2656	Alphaproteobacteria (taxid 28211)	NODE_5756_length_10121_cov_3.237853	Blastn
vOTU-589	Alphaproteobacteria (taxid 28211)	NODE_5756_length_10121_cov_3.237853	Blastn
vOTU-889	Alphaproteobacteria (taxid 28211)	NODE_5756_length_10121_cov_3.237853	Blastn
vOTU-302	Alphaproteobacteria (taxid 28211)	NODE_277915_length_780_cov_1.401138	tRNA
vOTU-1392	Alphaproteobacteria (taxid 28211)	NODE_7354_length_11578_cov_3.779150	Blastn
vOTU-589	Alphaproteobacteria (taxid 28211)	NODE_7354_length_11578_cov_3.779150	Blastn
vOTU-889	Alphaproteobacteria (taxid 28211)	NODE_7354_length_11578_cov_3.779150	Blastn
vOTU-1009	Alteromonas (taxid 226)	NODE_39566_length_2928_cov_3.087689	Blastn
vOTU-17	Amedibacterium intestinale (taxid 2583452)	NODE_12329_length_6718_cov_8.388345	Blastn
vOTU-1046	Amedibacterium intestinale (taxid 2583452)	NODE_19771_length_4588_cov_4.471292	Blastn
vOTU-1631	Amedibacterium intestinale (taxid 2583452)	NODE_18519_length_3385_cov_4.403869	Blastn
vOTU-63	Aminipila butyrica (taxid 433296)	NODE_35552_length_2717_cov_2.468561	Blastn
vOTU-1768	Aminipila butyrica (taxid 433296)	NODE_2520_length_32553_cov_8.639672	CRISPR
vOTU-317	Aminipila butyrica (taxid 433296)	NODE_2520_length_32553_cov_8.639672	CRISPR
vOTU-3815	Aminipila butyrica (taxid 433296)	NODE_2520_length_32553_cov_8.639672	CRISPR
vOTU-438	Aminipila butyrica (taxid 433296)	NODE_2520_length_32553_cov_8.639672	CRISPR
vOTU-4488	Aminipila butyrica (taxid 433296)	NODE_2520_length_32553_cov_8.639672	CRISPR
vOTU-5280	Aminipila butyrica (taxid 433296)	NODE_2520_length_32553_cov_8.639672	CRISPR
vOTU-5400	Aminipila butyrica (taxid 433296)	NODE_2520_length_32553_cov_8.639672	CRISPR
vOTU-317	Aminipila butyrica (taxid 433296)	NODE_161458_length_789_cov_2.637640	CRISPR
vOTU-1039	Aminipila butyrica (taxid 433296)	NODE_3540_length_23821_cov_12.654060	Blastn
vOTU-1256	Aminipila butyrica (taxid 433296)	NODE_3540_length_23821_cov_12.654060	Blastn
vOTU-1312	Aminipila butyrica (taxid 433296)	NODE_3540_length_23821_cov_12.654060	Blastn
vOTU-609	Aminipila butyrica (taxid 433296)	NODE_3540_length_23821_cov_12.654060	Blastn
vOTU-862	Aminipila butyrica (taxid 433296)	NODE_3540_length_23821_cov_12.654060	Blastn
vOTU-104	Aminipila butyrica (taxid 433296)	NODE_4409_length_21571_cov_5.367079	tRNA
vOTU-609	Aminipila butyrica (taxid 433296)	NODE_7960_length_12317_cov_5.204003	Blastn
vOTU-862	Aminipila butyrica (taxid 433296)	NODE_7960_length_12317_cov_5.204003	Blastn
vOTU-1732	Aminipila sp. CBA3637 (taxid 2697030)	NODE_37015_length_2634_cov_3.227219	tRNA
vOTU-210	Aminipila sp. CBA3637 (taxid 2697030)	NODE_37015_length_2634_cov_3.227219	tRNA
vOTU-1669	Aminipila sp. CBA3637 (taxid 2697030)	NODE_15808_length_6615_cov_5.659070	tRNA
vOTU-3957	Aminipila sp. CBA3637 (taxid 2697030)	NODE_7435_length_7861_cov_6.919450	Blastn
vOTU-4661	Aminipila sp. CBA3637 (taxid 2697030)	NODE_7435_length_7861_cov_6.919450	Blastn
vOTU-329	Aminipila sp. JN-18 (taxid 2507160)	NODE_10347_length_8776_cov_3.445454	Blastn
vOTU-353	Aminipila sp. JN-18 (taxid 2507160)	NODE_10347_length_8776_cov_3.445454	Blastn
vOTU-1462	Aminipila sp. JN-18 (taxid 2507160)	NODE_18557_length_4624_cov_3.028150	Blastn
vOTU-1462	Aminipila sp. JN-18 (taxid 2507160)	NODE_27526_length_3319_cov_3.939543	Blastn
vOTU-329	Aminipila sp. JN-18 (taxid 2507160)	NODE_10974_length_8326_cov_3.423324	Blastn
vOTU-353	Aminipila sp. JN-18 (taxid 2507160)	NODE_10974_length_8326_cov_3.423324	Blastn
vOTU-1462	Aminipila sp. JN-18 (taxid 2507160)	NODE_11002_length_5341_cov_4.140388	Blastn
vOTU-4107	Aminipila sp. JN-18 (taxid 2507160)	NODE_11002_length_5341_cov_4.140388	Blastn
vOTU-199	Aminipila sp. JN-18 (taxid 2507160)	NODE_11073_length_9089_cov_17.006436	Blastn
vOTU-296	Aminipila sp. JN-18 (taxid 2507160)	NODE_11073_length_9089_cov_17.006436	Blastn
vOTU-891	Aminipila sp. JN-18 (taxid 2507160)	NODE_11073_length_9089_cov_17.006436	Blastn
vOTU-329	Aminipila sp. JN-18 (taxid 2507160)	NODE_11185_length_9017_cov_3.471812	Blastn
vOTU-353	Aminipila sp. JN-18 (taxid 2507160)	NODE_11185_length_9017_cov_3.471812	Blastn
vOTU-353	Aminipila sp. JN-18 (taxid 2507160)	NODE_14693_length_5705_cov_3.290334	Blastn
vOTU-443	Aminipila sp. JN-18 (taxid 2507160)	NODE_12143_length_8345_cov_22.573657	Blastn
vOTU-505	Aminipila sp. JN-18 (taxid 2507160)	NODE_12143_length_8345_cov_22.573657	Blastn
vOTU-600	Aminipila sp. JN-18 (taxid 2507160)	NODE_12143_length_8345_cov_22.573657	Blastn
vOTU-1462	Aminipila sp. JN-18 (taxid 2507160)	NODE_14369_length_6127_cov_3.227934	Blastn
vOTU-1462	Aminipila sp. JN-18 (taxid 2507160)	NODE_14500_length_6072_cov_11.134779	Blastn
vOTU-1462	Aminipila sp. JN-18 (taxid 2507160)	NODE_16978_length_5254_cov_14.897238	Blastn
vOTU-329	Aminipila sp. JN-18 (taxid 2507160)	NODE_1318_length_54778_cov_7.521873	Blastn
vOTU-353	Aminipila sp. JN-18 (taxid 2507160)	NODE_1318_length_54778_cov_7.521873	Blastn
vOTU-1280	Aminipila sp. JN-18 (taxid 2507160)	NODE_13233_length_6615_cov_16.179107	Blastn
vOTU-1300	Aminipila sp. JN-18 (taxid 2507160)	NODE_13233_length_6615_cov_16.179107	Blastn
vOTU-600	Aminipila sp. JN-18 (taxid 2507160)	NODE_13233_length_6615_cov_16.179107	Blastn
vOTU-158	Aminipila sp. JN-18 (taxid 2507160)	NODE_9011_length_9507_cov_4.132662	Blastn
vOTU-55	Aminipila sp. JN-18 (taxid 2507160)	NODE_13424_length_7594_cov_5.993748	Blastn
vOTU-3159	Aminipila sp. JN-18 (taxid 2507160)	NODE_13424_length_7594_cov_5.993748	tRNA
vOTU-353	Aminipila sp. JN-18 (taxid 2507160)	NODE_26277_length_3635_cov_6.819562	Blastn
vOTU-353	Aminipila sp. JN-18 (taxid 2507160)	NODE_41034_length_2564_cov_5.435464	Blastn
vOTU-1823	Aminipila sp. JN-18 (taxid 2507160)	NODE_13964_length_4294_cov_24.427081	Blastn
vOTU-4799	Aminipila sp. JN-18 (taxid 2507160)	NODE_13964_length_4294_cov_24.427081	Blastn
vOTU-525	Aminipila sp. JN-18 (taxid 2507160)	NODE_13964_length_4294_cov_24.427081	Blastn
vOTU-992	Aminipila sp. JN-18 (taxid 2507160)	NODE_13964_length_4294_cov_24.427081	Blastn
vOTU-408	Aminipila sp. JN-18 (taxid 2507160)	NODE_21837_length_4218_cov_3.623279	Blastn
vOTU-1343	Aminipila sp. JN-18 (taxid 2507160)	NODE_14075_length_4263_cov_3.015528	Blastn
vOTU-1628	Aminipila sp. JN-18 (taxid 2507160)	NODE_14075_length_4263_cov_3.015528	Blastn
vOTU-3570	Aminipila sp. JN-18 (taxid 2507160)	NODE_14075_length_4263_cov_3.015528	Blastn
vOTU-465	Aminipila sp. JN-18 (taxid 2507160)	NODE_14075_length_4263_cov_3.015528	Blastn
vOTU-834	Aminipila sp. JN-18 (taxid 2507160)	NODE_14075_length_4263_cov_3.015528	Blastn
vOTU-888	Aminipila sp. JN-18 (taxid 2507160)	NODE_14075_length_4263_cov_3.015528	Blastn
vOTU-32	Aminipila sp. JN-18 (taxid 2507160)	NODE_1423_length_51749_cov_7.040002	Blastn
vOTU-55	Aminipila sp. JN-18 (taxid 2507160)	NODE_1423_length_51749_cov_7.040002	Blastn
vOTU-30	Aminipila sp. JN-18 (taxid 2507160)	NODE_1423_length_51749_cov_7.040002	tRNA
vOTU-53	Aminipila sp. JN-18 (taxid 2507160)	NODE_1423_length_51749_cov_7.040002	tRNA
vOTU-55	Aminipila sp. JN-18 (taxid 2507160)	NODE_14390_length_6119_cov_8.011089	Blastn
vOTU-68	Aminipila sp. JN-18 (taxid 2507160)	NODE_14390_length_6119_cov_8.011089	tRNA
vOTU-32	Aminipila sp. JN-18 (taxid 2507160)	NODE_1486_length_50308_cov_6.559376	Blastn
vOTU-55	Aminipila sp. JN-18 (taxid 2507160)	NODE_1486_length_50308_cov_6.559376	Blastn
vOTU-374	Aminipila sp. JN-18 (taxid 2507160)	NODE_150_length_184124_cov_11.167050	Blastn
vOTU-39	Aminipila sp. JN-18 (taxid 2507160)	NODE_150_length_184124_cov_11.167050	Blastn
vOTU-914	Aminipila sp. JN-18 (taxid 2507160)	NODE_150_length_184124_cov_11.167050	Blastn
vOTU-199	Aminipila sp. JN-18 (taxid 2507160)	NODE_15549_length_6700_cov_17.475162	Blastn
vOTU-296	Aminipila sp. JN-18 (taxid 2507160)	NODE_15549_length_6700_cov_17.475162	Blastn
vOTU-891	Aminipila sp. JN-18 (taxid 2507160)	NODE_15549_length_6700_cov_17.475162	Blastn
vOTU-353	Aminipila sp. JN-18 (taxid 2507160)	NODE_25288_length_4456_cov_3.667961	Blastn
vOTU-353	Aminipila sp. JN-18 (taxid 2507160)	NODE_34335_length_3500_cov_4.380368	Blastn
vOTU-353	Aminipila sp. JN-18 (taxid 2507160)	NODE_51528_length_2579_cov_3.492806	Blastn
vOTU-1280	Aminipila sp. JN-18 (taxid 2507160)	NODE_16638_length_5359_cov_16.480121	Blastn
vOTU-1300	Aminipila sp. JN-18 (taxid 2507160)	NODE_16638_length_5359_cov_16.480121	Blastn
vOTU-443	Aminipila sp. JN-18 (taxid 2507160)	NODE_16638_length_5359_cov_16.480121	Blastn
vOTU-505	Aminipila sp. JN-18 (taxid 2507160)	NODE_16638_length_5359_cov_16.480121	Blastn
vOTU-600	Aminipila sp. JN-18 (taxid 2507160)	NODE_16638_length_5359_cov_16.480121	Blastn
vOTU-55	Aminipila sp. JN-18 (taxid 2507160)	NODE_37539_length_3272_cov_2.182160	Blastn
vOTU-329	Aminipila sp. JN-18 (taxid 2507160)	NODE_1752_length_41529_cov_3.763051	Blastn
vOTU-353	Aminipila sp. JN-18 (taxid 2507160)	NODE_1752_length_41529_cov_3.763051	Blastn
vOTU-1916	Aminipila sp. JN-18 (taxid 2507160)	NODE_18833_length_3339_cov_5.043838	Blastn
vOTU-2032	Aminipila sp. JN-18 (taxid 2507160)	NODE_18833_length_3339_cov_5.043838	Blastn
vOTU-2318	Aminipila sp. JN-18 (taxid 2507160)	NODE_18833_length_3339_cov_5.043838	Blastn
vOTU-1462	Aminipila sp. JN-18 (taxid 2507160)	NODE_18515_length_3386_cov_3.175280	Blastn
vOTU-1462	Aminipila sp. JN-18 (taxid 2507160)	NODE_24444_length_2721_cov_2.534039	Blastn
vOTU-4360	Aminipila sp. JN-18 (taxid 2507160)	NODE_20491_length_3120_cov_2.977325	Blastn
vOTU-5529	Aminipila sp. JN-18 (taxid 2507160)	NODE_20491_length_3120_cov_2.977325	Blastn
vOTU-155	Aminipila sp. JN-18 (taxid 2507160)	NODE_20551_length_4430_cov_4.276361	tRNA
vOTU-19	Aminipila sp. JN-18 (taxid 2507160)	NODE_20551_length_4430_cov_4.276361	tRNA
vOTU-2350	Aminipila sp. JN-18 (taxid 2507160)	NODE_20551_length_4430_cov_4.276361	tRNA
vOTU-253	Aminipila sp. JN-18 (taxid 2507160)	NODE_20551_length_4430_cov_4.276361	tRNA
vOTU-390	Aminipila sp. JN-18 (taxid 2507160)	NODE_20551_length_4430_cov_4.276361	tRNA
vOTU-494	Aminipila sp. JN-18 (taxid 2507160)	NODE_20551_length_4430_cov_4.276361	tRNA
vOTU-52	Aminipila sp. JN-18 (taxid 2507160)	NODE_20551_length_4430_cov_4.276361	tRNA
vOTU-531	Aminipila sp. JN-18 (taxid 2507160)	NODE_20551_length_4430_cov_4.276361	tRNA
vOTU-2775	Aminipila sp. JN-18 (taxid 2507160)	NODE_2342_length_25696_cov_8.936414	Blastn
vOTU-4106	Aminipila sp. JN-18 (taxid 2507160)	NODE_16576_length_3715_cov_4.922760	Blastn
vOTU-199	Aminipila sp. JN-18 (taxid 2507160)	NODE_23536_length_4386_cov_29.460432	Blastn
vOTU-891	Aminipila sp. JN-18 (taxid 2507160)	NODE_23536_length_4386_cov_29.460432	Blastn
vOTU-525	Aminipila sp. JN-18 (taxid 2507160)	NODE_24281_length_4610_cov_160.202294	Blastn
vOTU-992	Aminipila sp. JN-18 (taxid 2507160)	NODE_24281_length_4610_cov_160.202294	Blastn
vOTU-374	Aminipila sp. JN-18 (taxid 2507160)	NODE_2542_length_31137_cov_5.772376	Blastn
vOTU-914	Aminipila sp. JN-18 (taxid 2507160)	NODE_2542_length_31137_cov_5.772376	Blastn
vOTU-1182	Aminipila sp. JN-18 (taxid 2507160)	NODE_10706_length_8505_cov_26.317038	Blastn
vOTU-353	Aminipila sp. JN-18 (taxid 2507160)	NODE_16645_length_5783_cov_3.331406	Blastn
vOTU-353	Aminipila sp. JN-18 (taxid 2507160)	NODE_32337_length_3415_cov_5.488916	Blastn
vOTU-1015	Aminipila sp. JN-18 (taxid 2507160)	NODE_2872_length_28961_cov_8.036214	Blastn
vOTU-357	Aminipila sp. JN-18 (taxid 2507160)	NODE_2872_length_28961_cov_8.036214	Blastn
vOTU-600	Aminipila sp. JN-18 (taxid 2507160)	NODE_8883_length_10110_cov_22.823383	Blastn
vOTU-1280	Aminipila sp. JN-18 (taxid 2507160)	NODE_29517_length_3661_cov_8.956194	Blastn
vOTU-1300	Aminipila sp. JN-18 (taxid 2507160)	NODE_29517_length_3661_cov_8.956194	Blastn
vOTU-1280	Aminipila sp. JN-18 (taxid 2507160)	NODE_3618_length_23160_cov_7.465104	Blastn
vOTU-1300	Aminipila sp. JN-18 (taxid 2507160)	NODE_3618_length_23160_cov_7.465104	Blastn
vOTU-600	Aminipila sp. JN-18 (taxid 2507160)	NODE_3618_length_23160_cov_7.465104	Blastn
vOTU-604	Aminipila sp. JN-18 (taxid 2507160)	NODE_3618_length_23160_cov_7.465104	Blastn
vOTU-374	Aminipila sp. JN-18 (taxid 2507160)	NODE_3656_length_23532_cov_5.325858	Blastn
vOTU-914	Aminipila sp. JN-18 (taxid 2507160)	NODE_3656_length_23532_cov_5.325858	Blastn
vOTU-199	Aminipila sp. JN-18 (taxid 2507160)	NODE_3732_length_25053_cov_16.731943	Blastn
vOTU-296	Aminipila sp. JN-18 (taxid 2507160)	NODE_3732_length_25053_cov_16.731943	Blastn
vOTU-891	Aminipila sp. JN-18 (taxid 2507160)	NODE_3732_length_25053_cov_16.731943	Blastn
vOTU-108	Aminipila sp. JN-18 (taxid 2507160)	NODE_1562_length_45949_cov_13.237138	tRNA
vOTU-199	Aminipila sp. JN-18 (taxid 2507160)	NODE_4632_length_18676_cov_25.608850	Blastn
vOTU-296	Aminipila sp. JN-18 (taxid 2507160)	NODE_4632_length_18676_cov_25.608850	Blastn
vOTU-891	Aminipila sp. JN-18 (taxid 2507160)	NODE_4632_length_18676_cov_25.608850	Blastn
vOTU-443	Aminipila sp. JN-18 (taxid 2507160)	NODE_6035_length_15941_cov_9.659291	Blastn
vOTU-505	Aminipila sp. JN-18 (taxid 2507160)	NODE_6035_length_15941_cov_9.659291	Blastn
vOTU-600	Aminipila sp. JN-18 (taxid 2507160)	NODE_6035_length_15941_cov_9.659291	Blastn
vOTU-604	Aminipila sp. JN-18 (taxid 2507160)	NODE_6035_length_15941_cov_9.659291	Blastn
vOTU-1587	Aminipila sp. JN-18 (taxid 2507160)	NODE_6387_length_9055_cov_6.510470	Blastn
vOTU-199	Aminipila sp. JN-18 (taxid 2507160)	NODE_6387_length_9055_cov_6.510470	Blastn
vOTU-296	Aminipila sp. JN-18 (taxid 2507160)	NODE_6387_length_9055_cov_6.510470	Blastn
vOTU-3401	Aminipila sp. JN-18 (taxid 2507160)	NODE_6387_length_9055_cov_6.510470	Blastn
vOTU-3499	Aminipila sp. JN-18 (taxid 2507160)	NODE_6387_length_9055_cov_6.510470	Blastn
vOTU-4704	Aminipila sp. JN-18 (taxid 2507160)	NODE_6387_length_9055_cov_6.510470	Blastn
vOTU-891	Aminipila sp. JN-18 (taxid 2507160)	NODE_6387_length_9055_cov_6.510470	Blastn
vOTU-32	Aminipila sp. JN-18 (taxid 2507160)	NODE_69_length_181517_cov_11.614556	Blastn
vOTU-4106	Aminipila sp. JN-18 (taxid 2507160)	NODE_69_length_181517_cov_11.614556	Blastn
vOTU-55	Aminipila sp. JN-18 (taxid 2507160)	NODE_69_length_181517_cov_11.614556	Blastn
vOTU-30	Aminipila sp. JN-18 (taxid 2507160)	NODE_69_length_181517_cov_11.614556	tRNA
vOTU-53	Aminipila sp. JN-18 (taxid 2507160)	NODE_69_length_181517_cov_11.614556	tRNA
vOTU-2687	Aminipila sp. JN-18 (taxid 2507160)	NODE_7555_length_7718_cov_4.179689	Blastn
vOTU-4036	Aminipila sp. JN-18 (taxid 2507160)	NODE_7555_length_7718_cov_4.179689	Blastn
vOTU-353	Aminipila sp. JN-18 (taxid 2507160)	NODE_7902_length_7336_cov_4.038435	Blastn
vOTU-3992	Aminipila sp. JN-18 (taxid 2507160)	NODE_7902_length_7336_cov_4.038435	Blastn
vOTU-4031	Aminipila sp. JN-18 (taxid 2507160)	NODE_7902_length_7336_cov_4.038435	Blastn
vOTU-4261	Aminipila sp. JN-18 (taxid 2507160)	NODE_7902_length_7336_cov_4.038435	Blastn
vOTU-6584	Aminipila sp. JN-18 (taxid 2507160)	NODE_7902_length_7336_cov_4.038435	Blastn
vOTU-329	Aminipila sp. JN-18 (taxid 2507160)	NODE_9337_length_9215_cov_8.428212	Blastn
vOTU-353	Aminipila sp. JN-18 (taxid 2507160)	NODE_9337_length_9215_cov_8.428212	Blastn
vOTU-1343	Aminipila sp. JN-18 (taxid 2507160)	NODE_9952_length_8651_cov_3.610450	Blastn
vOTU-1628	Aminipila sp. JN-18 (taxid 2507160)	NODE_9952_length_8651_cov_3.610450	Blastn
vOTU-465	Aminipila sp. JN-18 (taxid 2507160)	NODE_9952_length_8651_cov_3.610450	Blastn
vOTU-834	Aminipila sp. JN-18 (taxid 2507160)	NODE_9952_length_8651_cov_3.610450	Blastn
vOTU-888	Aminipila sp. JN-18 (taxid 2507160)	NODE_9952_length_8651_cov_3.610450	Blastn
vOTU-257	Aminobacter aminovorans (taxid 83263)	NODE_17169_length_6168_cov_6.048925	Blastn
vOTU-161	Aminomonas paucivorans DSM 12260 (taxid 584708)	NODE_5968_length_14333_cov_8.186448	Blastn
vOTU-212	Ammonifex degensii KC4 (taxid 429009)	NODE_26261_length_3454_cov_2.146876	Blastn
vOTU-196	Amphibacillus xylanus NBRC 15112 (taxid 698758)	NODE_19189_length_5139_cov_15.069340	tRNA
vOTU-603	Amycolatopsis japonica (taxid 208439)	NODE_23478_length_3989_cov_6.841258	Blastn
vOTU-62	Amycolatopsis mediterranei (taxid 33910)	NODE_9386_length_10572_cov_6.335112	Blastn
vOTU-4151	Amycolatopsis mediterranei (taxid 33910)	NODE_7746_length_7504_cov_3.735829	Blastn
vOTU-129	Amycolatopsis sp. Hca4 (taxid 2742131)	NODE_5837_length_9995_cov_3.555051	Blastn
vOTU-232	Anabaena cylindrica PCC 7122 (taxid 272123)	NODE_1068_length_62961_cov_40.916418	Blastn
vOTU-101	Anaerobutyricum hallii (taxid 39488)	NODE_1368_length_53313_cov_6.252179	Blastn
vOTU-204	Anaerobutyricum hallii (taxid 39488)	NODE_1226_length_57792_cov_10.610188	tRNA
vOTU-210	Anaerobutyricum hallii (taxid 39488)	NODE_1226_length_57792_cov_10.610188	tRNA
vOTU-2870	Anaerobutyricum hallii (taxid 39488)	NODE_1226_length_57792_cov_10.610188	tRNA
vOTU-188	Anaerobutyricum hallii (taxid 39488)	NODE_847_length_68875_cov_9.159452	Blastn
vOTU-153	Anaerobutyricum hallii (taxid 39488)	NODE_344_length_129486_cov_10.937516	Blastn
vOTU-1	Anaerobutyricum hallii (taxid 39488)	NODE_16273_length_6453_cov_5.553011	Blastn
vOTU-212	Anaerobutyricum hallii (taxid 39488)	NODE_16273_length_6453_cov_5.553011	Blastn
vOTU-787	Anaerobutyricum hallii (taxid 39488)	NODE_871_length_77622_cov_10.900535	Blastn
vOTU-204	Anaerobutyricum hallii (taxid 39488)	NODE_194799_length_1000_cov_46.056338	tRNA
vOTU-2870	Anaerobutyricum hallii (taxid 39488)	NODE_194799_length_1000_cov_46.056338	tRNA
vOTU-36	Anaerobutyricum hallii (taxid 39488)	NODE_194799_length_1000_cov_46.056338	tRNA
vOTU-755	Anaerobutyricum hallii (taxid 39488)	NODE_2137_length_35700_cov_6.288606	Blastn
vOTU-621	Anaerobutyricum hallii (taxid 39488)	NODE_2137_length_35700_cov_6.288606	tRNA
vOTU-5173	Anaerobutyricum hallii (taxid 39488)	NODE_4206_length_14084_cov_23.175055	Blastn
vOTU-755	Anaerobutyricum hallii (taxid 39488)	NODE_2503_length_35700_cov_9.692249	Blastn
vOTU-621	Anaerobutyricum hallii (taxid 39488)	NODE_2503_length_35700_cov_9.692249	tRNA
vOTU-142	Anaerobutyricum hallii (taxid 39488)	NODE_12786_length_7268_cov_3.924072	Blastn
vOTU-2052	Anaerobutyricum hallii (taxid 39488)	NODE_27508_length_4162_cov_5.445532	tRNA
vOTU-2845	Anaerobutyricum hallii (taxid 39488)	NODE_27508_length_4162_cov_5.445532	tRNA
vOTU-194	Anaerobutyricum hallii (taxid 39488)	NODE_324819_length_573_cov_2.794355	tRNA
vOTU-204	Anaerobutyricum hallii (taxid 39488)	NODE_53766_length_1995_cov_2.480188	tRNA
vOTU-142	Anaerobutyricum hallii (taxid 39488)	NODE_371045_length_523_cov_7.208520	tRNA
vOTU-204	Anaerobutyricum hallii (taxid 39488)	NODE_371045_length_523_cov_7.208520	tRNA
vOTU-2870	Anaerobutyricum hallii (taxid 39488)	NODE_371045_length_523_cov_7.208520	tRNA
vOTU-2900	Anaerobutyricum hallii (taxid 39488)	NODE_395099_length_501_cov_2.589623	tRNA
vOTU-36	Anaerobutyricum hallii (taxid 39488)	NODE_282341_length_629_cov_3.789855	tRNA
vOTU-389	Anaerobutyricum hallii (taxid 39488)	NODE_10416_length_7929_cov_4.249491	tRNA
vOTU-194	Anaerobutyricum hallii (taxid 39488)	NODE_15489_length_5719_cov_4.979972	tRNA
vOTU-32	Anaerobutyricum hallii (taxid 39488)	NODE_30408_length_3236_cov_2.809433	tRNA
vOTU-4964	Anaerobutyricum hallii (taxid 39488)	NODE_158199_length_988_cov_2.933041	tRNA
vOTU-106	Anaerobutyricum hallii (taxid 39488)	NODE_80084_length_1867_cov_209.253631	tRNA
vOTU-194	Anaerobutyricum hallii (taxid 39488)	NODE_5806_length_16539_cov_4.820860	tRNA
vOTU-36	Anaerobutyricum hallii (taxid 39488)	NODE_579121_length_465_cov_7.592784	tRNA
vOTU-230	Anaerobutyricum hallii (taxid 39488)	NODE_632118_length_337_cov_14.400000	tRNA
vOTU-36	Anaerobutyricum hallii (taxid 39488)	NODE_632118_length_337_cov_14.400000	tRNA
vOTU-76	Anaerobutyricum hallii (taxid 39488)	NODE_632118_length_337_cov_14.400000	tRNA
vOTU-138	Anaerobutyricum hallii (taxid 39488)	NODE_676_length_83737_cov_15.753909	tRNA
vOTU-23	Anaerobutyricum hallii (taxid 39488)	NODE_676_length_83737_cov_15.753909	tRNA
vOTU-230	Anaerobutyricum hallii (taxid 39488)	NODE_7295_length_13316_cov_3.211496	tRNA
vOTU-36	Anaerobutyricum hallii (taxid 39488)	NODE_7295_length_13316_cov_3.211496	tRNA
vOTU-76	Anaerobutyricum hallii (taxid 39488)	NODE_7295_length_13316_cov_3.211496	tRNA
vOTU-204	Anaerobutyricum hallii (taxid 39488)	NODE_741031_length_386_cov_2.595469	tRNA
vOTU-230	Anaerobutyricum hallii (taxid 39488)	NODE_741031_length_386_cov_2.595469	tRNA
vOTU-36	Anaerobutyricum hallii (taxid 39488)	NODE_741031_length_386_cov_2.595469	tRNA
vOTU-76	Anaerobutyricum hallii (taxid 39488)	NODE_741031_length_386_cov_2.595469	tRNA
vOTU-389	Anaerobutyricum hallii (taxid 39488)	NODE_2975_length_20065_cov_8.064289	tRNA
vOTU-212	Anaerobutyricum hallii (taxid 39488)	NODE_8250_length_7026_cov_3.253418	Blastn
vOTU-39	Anaerobutyricum hallii (taxid 39488)	NODE_8250_length_7026_cov_3.253418	Blastn
vOTU-194	Anaerobutyricum hallii (taxid 39488)	NODE_14940_length_6351_cov_3.345075	tRNA
vOTU-194	Anaerobutyricum hallii (taxid 39488)	NODE_170765_length_1007_cov_2.217204	tRNA
vOTU-2163	Anaerobutyricum hallii (taxid 39488)	NODE_200631_length_897_cov_14.297561	tRNA
vOTU-212	Anaerobutyricum hallii (taxid 39488)	NODE_9404_length_10556_cov_4.749404	Blastn
vOTU-39	Anaerobutyricum hallii (taxid 39488)	NODE_9404_length_10556_cov_4.749404	Blastn
vOTU-204	Anaerobutyricum hallii (taxid 39488)	NODE_990504_length_310_cov_7.824034	tRNA
vOTU-2870	Anaerobutyricum hallii (taxid 39488)	NODE_990504_length_310_cov_7.824034	tRNA
vOTU-91	Anaerocolumna (taxid 1843210)	NODE_5255_length_18131_cov_32.742772	Blastn
vOTU-204	Anaerocolumna (taxid 1843210)	NODE_194526_length_1001_cov_45.018398	tRNA
vOTU-2870	Anaerocolumna (taxid 1843210)	NODE_194526_length_1001_cov_45.018398	tRNA
vOTU-36	Anaerocolumna (taxid 1843210)	NODE_194526_length_1001_cov_45.018398	tRNA
vOTU-1017	Anaerocolumna cellulosilytica (taxid 433286)	NODE_4831_length_17274_cov_18.599291	Blastn
vOTU-1528	Anaerocolumna cellulosilytica (taxid 433286)	NODE_1356_length_53834_cov_10.783879	Blastn
vOTU-2	Anaerocolumna cellulosilytica (taxid 433286)	NODE_16087_length_5239_cov_2.540876	Blastn
vOTU-972	Anaerocolumna cellulosilytica (taxid 433286)	NODE_2320_length_35070_cov_11.146201	Blastn
vOTU-25	Anaerocolumna cellulosilytica (taxid 433286)	NODE_9042_length_9470_cov_8.160545	Blastn
vOTU-216	Anaerocolumna cellulosilytica (taxid 433286)	NODE_17126_length_6182_cov_12.189681	Blastn
vOTU-570	Anaerocolumna cellulosilytica (taxid 433286)	NODE_17979_length_5923_cov_5.140096	Blastn
vOTU-1017	Anaerocolumna cellulosilytica (taxid 433286)	NODE_22246_length_4159_cov_18.549731	Blastn
vOTU-586	Anaerocolumna cellulosilytica (taxid 433286)	NODE_22246_length_4159_cov_18.549731	Blastn
vOTU-113	Anaerocolumna cellulosilytica (taxid 433286)	NODE_10043_length_9035_cov_43.254856	Blastn
vOTU-2	Anaerocolumna cellulosilytica (taxid 433286)	NODE_7804_length_11404_cov_50.509844	Blastn
vOTU-204	Anaerocolumna cellulosilytica (taxid 433286)	NODE_297260_length_648_cov_5.637478	tRNA
vOTU-2870	Anaerocolumna cellulosilytica (taxid 433286)	NODE_297260_length_648_cov_5.637478	tRNA
vOTU-3455	Anaerocolumna cellulosilytica (taxid 433286)	NODE_297260_length_648_cov_5.637478	tRNA
vOTU-36	Anaerocolumna cellulosilytica (taxid 433286)	NODE_297260_length_648_cov_5.637478	tRNA
vOTU-204	Anaerocolumna cellulosilytica (taxid 433286)	NODE_34709_length_3471_cov_8.051856	tRNA
vOTU-210	Anaerocolumna cellulosilytica (taxid 433286)	NODE_34709_length_3471_cov_8.051856	tRNA
vOTU-2870	Anaerocolumna cellulosilytica (taxid 433286)	NODE_34709_length_3471_cov_8.051856	tRNA
vOTU-36	Anaerocolumna cellulosilytica (taxid 433286)	NODE_34709_length_3471_cov_8.051856	tRNA
vOTU-225	Anaerocolumna cellulosilytica (taxid 433286)	NODE_41623_length_2816_cov_6.536692	Blastn
vOTU-194	Anaerocolumna cellulosilytica (taxid 433286)	NODE_41623_length_2816_cov_6.536692	tRNA
vOTU-1017	Anaerocolumna cellulosilytica (taxid 433286)	NODE_5571_length_15320_cov_26.111723	Blastn
vOTU-586	Anaerocolumna cellulosilytica (taxid 433286)	NODE_5571_length_15320_cov_26.111723	Blastn
vOTU-225	Anaerocolumna cellulosilytica (taxid 433286)	NODE_5661_length_16978_cov_7.233063	Blastn
vOTU-194	Anaerocolumna cellulosilytica (taxid 433286)	NODE_5661_length_16978_cov_7.233063	tRNA
vOTU-2187	Anaerocolumna cellulosilytica (taxid 433286)	NODE_7631_length_7636_cov_10.522424	Blastn
vOTU-3840	Anaerocolumna cellulosilytica (taxid 433286)	NODE_7631_length_7636_cov_10.522424	Blastn
vOTU-4	Anaerocolumna sp. CBA3638 (taxid 2696063)	NODE_7263_length_11337_cov_6.354618	Blastn
vOTU-8	Anaerocolumna sp. CBA3638 (taxid 2696063)	NODE_31498_length_2986_cov_3.638707	Blastn
vOTU-95	Anaerocolumna sp. CBA3638 (taxid 2696063)	NODE_2425_length_33545_cov_11.837546	Blastn
vOTU-25	Anaerocolumna sp. CBA3638 (taxid 2696063)	NODE_21928_length_4203_cov_7.649055	Blastn
vOTU-2778	Anaerocolumna sp. CBA3638 (taxid 2696063)	NODE_1405_length_40387_cov_13.762863	Blastn
vOTU-3994	Anaerocolumna sp. CBA3638 (taxid 2696063)	NODE_1405_length_40387_cov_13.762863	Blastn
vOTU-561	Anaerocolumna sp. CBA3638 (taxid 2696063)	NODE_1405_length_40387_cov_13.762863	Blastn
vOTU-117	Anaerocolumna sp. CBA3638 (taxid 2696063)	NODE_1405_length_40387_cov_13.762863	tRNA
vOTU-215	Anaerocolumna sp. CBA3638 (taxid 2696063)	NODE_1405_length_40387_cov_13.762863	tRNA
vOTU-3855	Anaerocolumna sp. CBA3638 (taxid 2696063)	NODE_1405_length_40387_cov_13.762863	tRNA
vOTU-80	Anaerocolumna sp. CBA3638 (taxid 2696063)	NODE_1405_length_40387_cov_13.762863	tRNA
vOTU-1044	Anaerocolumna sp. CBA3638 (taxid 2696063)	NODE_1674_length_45129_cov_12.787401	Blastn
vOTU-486	Anaerocolumna sp. CBA3638 (taxid 2696063)	NODE_1674_length_45129_cov_12.787401	Blastn
vOTU-412	Anaerocolumna sp. CBA3638 (taxid 2696063)	NODE_1674_length_45129_cov_12.787401	tRNA
vOTU-486	Anaerocolumna sp. CBA3638 (taxid 2696063)	NODE_1693_length_34321_cov_5.379921	Blastn
vOTU-412	Anaerocolumna sp. CBA3638 (taxid 2696063)	NODE_1693_length_34321_cov_5.379921	tRNA
vOTU-91	Anaerocolumna sp. CBA3638 (taxid 2696063)	NODE_26898_length_4240_cov_34.827288	Blastn
vOTU-95	Anaerocolumna sp. CBA3638 (taxid 2696063)	NODE_2013_length_38770_cov_10.201277	Blastn
vOTU-83	Anaerocolumna sp. CBA3638 (taxid 2696063)	NODE_2013_length_38770_cov_10.201277	tRNA
vOTU-204	Anaerocolumna sp. CBA3638 (taxid 2696063)	NODE_3220_length_18519_cov_8.938022	tRNA
vOTU-210	Anaerocolumna sp. CBA3638 (taxid 2696063)	NODE_3220_length_18519_cov_8.938022	tRNA
vOTU-2870	Anaerocolumna sp. CBA3638 (taxid 2696063)	NODE_3220_length_18519_cov_8.938022	tRNA
vOTU-152	Anaerocolumna sp. CBA3638 (taxid 2696063)	NODE_37989_length_3244_cov_3.001263	tRNA
vOTU-232	Anaerocolumna sp. CBA3638 (taxid 2696063)	NODE_37989_length_3244_cov_3.001263	tRNA
vOTU-76	Anaerocolumna sp. CBA3638 (taxid 2696063)	NODE_37989_length_3244_cov_3.001263	tRNA
vOTU-412	Anaerocolumna sp. CBA3638 (taxid 2696063)	NODE_427957_length_474_cov_2.146096	tRNA
vOTU-486	Anaerocolumna sp. CBA3638 (taxid 2696063)	NODE_44531_length_2880_cov_2.397788	Blastn
vOTU-412	Anaerocolumna sp. CBA3638 (taxid 2696063)	NODE_44531_length_2880_cov_2.397788	tRNA
vOTU-412	Anaerocolumna sp. CBA3638 (taxid 2696063)	NODE_102822_length_1326_cov_1.737390	tRNA
vOTU-204	Anaerocolumna sp. CBA3638 (taxid 2696063)	NODE_75245_length_1818_cov_2.675474	tRNA
vOTU-2870	Anaerocolumna sp. CBA3638 (taxid 2696063)	NODE_75245_length_1818_cov_2.675474	tRNA
vOTU-36	Anaerocolumna sp. CBA3638 (taxid 2696063)	NODE_75245_length_1818_cov_2.675474	tRNA
vOTU-204	Anaerocolumna sp. CBA3638 (taxid 2696063)	NODE_8766_length_6631_cov_2.931645	tRNA
vOTU-2870	Anaerocolumna sp. CBA3638 (taxid 2696063)	NODE_8766_length_6631_cov_2.931645	tRNA
vOTU-31	Anaerocolumna sp. CBA3638 (taxid 2696063)	NODE_9696_length_10234_cov_7.056710	Blastn
vOTU-73	Anaerocolumna sp. CBA3638 (taxid 2696063)	NODE_9696_length_10234_cov_7.056710	Blastn
vOTU-30	Anaerocolumna sp. CTTW (taxid 2736602)	NODE_19391_length_4455_cov_2.732069	Blastn
vOTU-559	Anaerocolumna sp. CTTW (taxid 2736602)	NODE_12673_length_6553_cov_2.998765	Blastn
vOTU-27	Anaerocolumna sp. CTTW (taxid 2736602)	NODE_482_length_96993_cov_29.320040	Blastn
vOTU-320	Anaerocolumna sp. CTTW (taxid 2736602)	NODE_35945_length_3381_cov_2.136501	Blastn
vOTU-38	Anaerocolumna sp. CTTW (taxid 2736602)	NODE_7554_length_12909_cov_85.504910	Blastn
vOTU-59	Anaerocolumna sp. CTTW (taxid 2736602)	NODE_3734_length_25045_cov_83.533483	Blastn
vOTU-91	Anaerocolumna sp. CTTW (taxid 2736602)	NODE_45439_length_2834_cov_25.599927	Blastn
vOTU-91	Anaerocolumna sp. CTTW (taxid 2736602)	NODE_46212_length_2798_cov_20.713708	Blastn
vOTU-91	Anaerocolumna sp. CTTW (taxid 2736602)	NODE_6882_length_14057_cov_19.273820	Blastn
vOTU-27	Anaerocolumna sp. CTTW (taxid 2736602)	NODE_4201_length_14101_cov_8.289932	Blastn
vOTU-27	Anaerocolumna sp. CTTW (taxid 2736602)	NODE_679_length_66476_cov_7.420654	Blastn
vOTU-27	Anaerocolumna sp. CTTW (taxid 2736602)	NODE_217_length_145423_cov_16.074849	Blastn
vOTU-25	Anaerocolumna sp. CTTW (taxid 2736602)	NODE_217_length_145423_cov_16.074849	tRNA
vOTU-59	Anaerocolumna sp. CTTW (taxid 2736602)	NODE_2081_length_28531_cov_9.434702	Blastn
vOTU-99	Anaerocolumna sp. CTTW (taxid 2736602)	NODE_83_length_167914_cov_18.088228	Blastn
vOTU-111	Anaerocolumna sp. CTTW (taxid 2736602)	NODE_2591_length_34566_cov_8.532605	Blastn
vOTU-99	Anaerocolumna sp. CTTW (taxid 2736602)	NODE_2591_length_34566_cov_8.532605	tRNA
vOTU-27	Anaerocolumna sp. CTTW (taxid 2736602)	NODE_2661_length_30952_cov_4.518154	Blastn
vOTU-91	Anaerocolumna sp. CTTW (taxid 2736602)	NODE_276_length_132760_cov_13.994091	Blastn
vOTU-117	Anaerocolumna sp. CTTW (taxid 2736602)	NODE_276_length_132760_cov_13.994091	tRNA
vOTU-215	Anaerocolumna sp. CTTW (taxid 2736602)	NODE_276_length_132760_cov_13.994091	tRNA
vOTU-3855	Anaerocolumna sp. CTTW (taxid 2736602)	NODE_276_length_132760_cov_13.994091	tRNA
vOTU-80	Anaerocolumna sp. CTTW (taxid 2736602)	NODE_276_length_132760_cov_13.994091	tRNA
vOTU-91	Anaerocolumna sp. CTTW (taxid 2736602)	NODE_277_length_132630_cov_75.384292	Blastn
vOTU-117	Anaerocolumna sp. CTTW (taxid 2736602)	NODE_277_length_132630_cov_75.384292	tRNA
vOTU-215	Anaerocolumna sp. CTTW (taxid 2736602)	NODE_277_length_132630_cov_75.384292	tRNA
vOTU-3855	Anaerocolumna sp. CTTW (taxid 2736602)	NODE_277_length_132630_cov_75.384292	tRNA
vOTU-80	Anaerocolumna sp. CTTW (taxid 2736602)	NODE_277_length_132630_cov_75.384292	tRNA
vOTU-559	Anaerocolumna sp. CTTW (taxid 2736602)	NODE_5386_length_16180_cov_6.318326	Blastn
vOTU-1732	Anaerocolumna sp. CTTW (taxid 2736602)	NODE_4749_length_17565_cov_10.251258	tRNA
vOTU-204	Anaerocolumna sp. CTTW (taxid 2736602)	NODE_4749_length_17565_cov_10.251258	tRNA
vOTU-210	Anaerocolumna sp. CTTW (taxid 2736602)	NODE_4749_length_17565_cov_10.251258	tRNA
vOTU-2870	Anaerocolumna sp. CTTW (taxid 2736602)	NODE_4749_length_17565_cov_10.251258	tRNA
vOTU-36	Anaerocolumna sp. CTTW (taxid 2736602)	NODE_4749_length_17565_cov_10.251258	tRNA
vOTU-176	Anaerocolumna sp. CTTW (taxid 2736602)	NODE_5201_length_11171_cov_10.839643	tRNA
vOTU-176	Anaerocolumna sp. CTTW (taxid 2736602)	NODE_958_length_65442_cov_44.873327	tRNA
vOTU-230	Anaerocolumna sp. CTTW (taxid 2736602)	NODE_86016_length_1156_cov_3.345690	tRNA
vOTU-36	Anaerocolumna sp. CTTW (taxid 2736602)	NODE_86016_length_1156_cov_3.345690	tRNA
vOTU-76	Anaerocolumna sp. CTTW (taxid 2736602)	NODE_86016_length_1156_cov_3.345690	tRNA
vOTU-111	Anaerocolumna sp. CTTW (taxid 2736602)	NODE_8956_length_10031_cov_4.277979	Blastn
vOTU-99	Anaerocolumna sp. CTTW (taxid 2736602)	NODE_8956_length_10031_cov_4.277979	tRNA
vOTU-29	Anaerohalosphaera lusitana (taxid 1936003)	NODE_25580_length_4099_cov_4.328941	Blastn
vOTU-230	Anaerostipes (taxid 207244)	NODE_610041_length_368_cov_1.821306	tRNA
vOTU-36	Anaerostipes (taxid 207244)	NODE_610041_length_368_cov_1.821306	tRNA
vOTU-76	Anaerostipes (taxid 207244)	NODE_610041_length_368_cov_1.821306	tRNA
vOTU-2086	Anaerostipes (taxid 207244)	NODE_7424_length_11946_cov_7.349313	tRNA
vOTU-83	Anaerostipes (taxid 207244)	NODE_7424_length_11946_cov_7.349313	tRNA
vOTU-152	Anaerostipes (taxid 207244)	NODE_911506_length_301_cov_34.316964	tRNA
vOTU-53	Anaerostipes caccae (taxid 105841)	NODE_4340_length_19200_cov_8.241385	Blastn
vOTU-132	Anaerostipes caccae (taxid 105841)	NODE_3878_length_21541_cov_6.973164	Blastn
vOTU-19	Anaerostipes caccae (taxid 105841)	NODE_21732_length_4237_cov_3.633413	Blastn
vOTU-53	Anaerostipes caccae (taxid 105841)	NODE_3311_length_24822_cov_5.085027	Blastn
vOTU-667	Anaerostipes caccae (taxid 105841)	NODE_1907_length_39275_cov_9.577096	Blastn
vOTU-844	Anaerostipes caccae (taxid 105841)	NODE_11201_length_9001_cov_6.095473	Blastn
vOTU-844	Anaerostipes caccae (taxid 105841)	NODE_5488_length_17412_cov_7.036862	Blastn
vOTU-1062	Anaerostipes caccae (taxid 105841)	NODE_2187_length_27466_cov_7.016503	Blastn
vOTU-1379	Anaerostipes caccae (taxid 105841)	NODE_2187_length_27466_cov_7.016503	Blastn
vOTU-173	Anaerostipes caccae (taxid 105841)	NODE_2187_length_27466_cov_7.016503	Blastn
vOTU-1701	Anaerostipes caccae (taxid 105841)	NODE_25381_length_3548_cov_3.539614	Blastn
vOTU-844	Anaerostipes caccae (taxid 105841)	NODE_25381_length_3548_cov_3.539614	Blastn
vOTU-45	Anaerostipes caccae (taxid 105841)	NODE_9305_length_9698_cov_3.857603	Blastn
vOTU-79	Anaerostipes caccae (taxid 105841)	NODE_31910_length_3452_cov_3.566222	Blastn
vOTU-844	Anaerostipes caccae (taxid 105841)	NODE_15668_length_6097_cov_9.358970	Blastn
vOTU-230	Anaerostipes caccae (taxid 105841)	NODE_3748_length_22444_cov_17.982608	tRNA
vOTU-36	Anaerostipes caccae (taxid 105841)	NODE_3748_length_22444_cov_17.982608	tRNA
vOTU-76	Anaerostipes caccae (taxid 105841)	NODE_3748_length_22444_cov_17.982608	tRNA
vOTU-176	Anaerostipes caccae (taxid 105841)	NODE_28372_length_3417_cov_4.486228	tRNA
vOTU-2900	Anaerostipes caccae (taxid 105841)	NODE_20648_length_4414_cov_4.865575	tRNA
vOTU-1087	Anaerostipes caccae (taxid 105841)	NODE_5005_length_17028_cov_3.432482	Blastn
vOTU-1352	Anaerostipes caccae (taxid 105841)	NODE_5005_length_17028_cov_3.432482	Blastn
vOTU-315	Anaerostipes caccae (taxid 105841)	NODE_5005_length_17028_cov_3.432482	Blastn
vOTU-327	Anaerostipes caccae (taxid 105841)	NODE_5005_length_17028_cov_3.432482	Blastn
vOTU-678	Anaerostipes caccae (taxid 105841)	NODE_5005_length_17028_cov_3.432482	Blastn
vOTU-959	Anaerostipes caccae (taxid 105841)	NODE_5005_length_17028_cov_3.432482	Blastn
vOTU-176	Anaerostipes caccae (taxid 105841)	NODE_2080_length_41799_cov_4.894061	tRNA
vOTU-91	Anaerostipes caccae (taxid 105841)	NODE_6421_length_15031_cov_31.320784	Blastn
vOTU-117	Anaerostipes caccae (taxid 105841)	NODE_6421_length_15031_cov_31.320784	tRNA
vOTU-215	Anaerostipes caccae (taxid 105841)	NODE_6421_length_15031_cov_31.320784	tRNA
vOTU-3855	Anaerostipes caccae (taxid 105841)	NODE_6421_length_15031_cov_31.320784	tRNA
vOTU-80	Anaerostipes caccae (taxid 105841)	NODE_6421_length_15031_cov_31.320784	tRNA
vOTU-1230	Anaerostipes caccae (taxid 105841)	NODE_5393_length_16162_cov_14.406466	tRNA
vOTU-437	Anaerostipes caccae (taxid 105841)	NODE_894_length_66230_cov_18.900836	Blastn
vOTU-522	Anaerostipes caccae (taxid 105841)	NODE_894_length_66230_cov_18.900836	Blastn
vOTU-740	Anaerostipes caccae (taxid 105841)	NODE_894_length_66230_cov_18.900836	Blastn
vOTU-438	Anaerostipes caccae (taxid 105841)	NODE_894_length_66230_cov_18.900836	tRNA
vOTU-437	Anaerostipes caccae (taxid 105841)	NODE_898_length_75928_cov_23.901702	Blastn
vOTU-522	Anaerostipes caccae (taxid 105841)	NODE_898_length_75928_cov_23.901702	Blastn
vOTU-740	Anaerostipes caccae (taxid 105841)	NODE_898_length_75928_cov_23.901702	Blastn
vOTU-438	Anaerostipes caccae (taxid 105841)	NODE_898_length_75928_cov_23.901702	tRNA
vOTU-152	Anaerostipes hadrus (taxid 649756)	NODE_114446_length_1231_cov_2.214038	tRNA
vOTU-232	Anaerostipes hadrus (taxid 649756)	NODE_114446_length_1231_cov_2.214038	tRNA
vOTU-76	Anaerostipes hadrus (taxid 649756)	NODE_114446_length_1231_cov_2.214038	tRNA
vOTU-484	Anaerostipes hadrus (taxid 649756)	NODE_7038_length_11715_cov_13.180615	Blastn
vOTU-618	Anaerostipes hadrus (taxid 649756)	NODE_1341_length_41738_cov_8.498140	Blastn
vOTU-23	Anaerostipes hadrus (taxid 649756)	NODE_1341_length_41738_cov_8.498140	tRNA
vOTU-175	Anaerostipes hadrus (taxid 649756)	NODE_18500_length_4872_cov_3.730970	Blastn
vOTU-385	Anaerostipes hadrus (taxid 649756)	NODE_29561_length_3306_cov_2.414060	Blastn
vOTU-44	Anaerostipes hadrus (taxid 649756)	NODE_2607_length_34351_cov_92.294363	Blastn
vOTU-611	Anaerostipes hadrus (taxid 649756)	NODE_13696_length_7473_cov_5.965657	Blastn
vOTU-44	Anaerostipes hadrus (taxid 649756)	NODE_1594_length_36334_cov_9.255233	Blastn
vOTU-152	Anaerostipes hadrus (taxid 649756)	NODE_236038_length_710_cov_13.646130	tRNA
vOTU-230	Anaerostipes hadrus (taxid 649756)	NODE_236038_length_710_cov_13.646130	tRNA
vOTU-232	Anaerostipes hadrus (taxid 649756)	NODE_236038_length_710_cov_13.646130	tRNA
vOTU-36	Anaerostipes hadrus (taxid 649756)	NODE_236038_length_710_cov_13.646130	tRNA
vOTU-76	Anaerostipes hadrus (taxid 649756)	NODE_236038_length_710_cov_13.646130	tRNA
vOTU-204	Anaerostipes hadrus (taxid 649756)	NODE_266649_length_654_cov_3.804159	tRNA
vOTU-210	Anaerostipes hadrus (taxid 649756)	NODE_266649_length_654_cov_3.804159	tRNA
vOTU-2870	Anaerostipes hadrus (taxid 649756)	NODE_266649_length_654_cov_3.804159	tRNA
vOTU-152	Anaerostipes hadrus (taxid 649756)	NODE_29013_length_3181_cov_3.677835	tRNA
vOTU-232	Anaerostipes hadrus (taxid 649756)	NODE_29013_length_3181_cov_3.677835	tRNA
vOTU-76	Anaerostipes hadrus (taxid 649756)	NODE_29013_length_3181_cov_3.677835	tRNA
vOTU-1230	Anaerostipes hadrus (taxid 649756)	NODE_1872_length_39792_cov_4.862999	tRNA
vOTU-152	Anaerostipes hadrus (taxid 649756)	NODE_464536_length_495_cov_3.138756	tRNA
vOTU-232	Anaerostipes hadrus (taxid 649756)	NODE_464536_length_495_cov_3.138756	tRNA
vOTU-76	Anaerostipes hadrus (taxid 649756)	NODE_464536_length_495_cov_3.138756	tRNA
vOTU-210	Anaerostipes hadrus (taxid 649756)	NODE_2447_length_36484_cov_7.707034	tRNA
vOTU-2	Anaerostipes rhamnosivorans (taxid 1229621)	NODE_27266_length_3347_cov_3.372171	Blastn
vOTU-33	Anaerostipes rhamnosivorans (taxid 1229621)	NODE_35565_length_2866_cov_3.263535	Blastn
vOTU-422	Anaerostipes rhamnosivorans (taxid 1229621)	NODE_5935_length_16203_cov_4.494853	Blastn
vOTU-230	Anaerostipes rhamnosivorans (taxid 1229621)	NODE_24192_length_3886_cov_3.162247	tRNA
vOTU-2845	Anaerostipes rhamnosivorans (taxid 1229621)	NODE_24192_length_3886_cov_3.162247	tRNA
vOTU-259	Anaerostipes rhamnosivorans (taxid 1229621)	NODE_38638_length_2983_cov_3.295939	Blastn
vOTU-267	Anaerostipes rhamnosivorans (taxid 1229621)	NODE_14515_length_6511_cov_4.373174	Blastn
vOTU-433	Anaerostipes rhamnosivorans (taxid 1229621)	NODE_11113_length_8233_cov_9.843551	Blastn
vOTU-2086	Anaerostipes rhamnosivorans (taxid 1229621)	NODE_4291_length_22142_cov_10.064355	tRNA
vOTU-83	Anaerostipes rhamnosivorans (taxid 1229621)	NODE_4291_length_22142_cov_10.064355	tRNA
vOTU-194	Anaerostipes rhamnosivorans (taxid 1229621)	NODE_5540_length_15406_cov_4.227021	tRNA
vOTU-194	Anaerostipes rhamnosivorans (taxid 1229621)	NODE_7869_length_11328_cov_3.674429	tRNA
vOTU-158	Anaerotignum propionicum DSM 1682 (taxid 991789)	NODE_13394_length_6214_cov_3.302591	Blastn
vOTU-158	Anaerotignum propionicum DSM 1682 (taxid 991789)	NODE_1133_length_65794_cov_11.104280	Blastn
vOTU-261	Anaerotignum propionicum DSM 1682 (taxid 991789)	NODE_1133_length_65794_cov_11.104280	Blastn
vOTU-137	Anaerotignum propionicum DSM 1682 (taxid 991789)	NODE_1133_length_65794_cov_11.104280	tRNA
vOTU-220	Anaerotignum propionicum DSM 1682 (taxid 991789)	NODE_1133_length_65794_cov_11.104280	tRNA
vOTU-695	Anaerotignum propionicum DSM 1682 (taxid 991789)	NODE_7687_length_10718_cov_3.784325	Blastn
vOTU-158	Anaerotignum propionicum DSM 1682 (taxid 991789)	NODE_1302_length_42734_cov_6.218299	Blastn
vOTU-261	Anaerotignum propionicum DSM 1682 (taxid 991789)	NODE_1302_length_42734_cov_6.218299	Blastn
vOTU-137	Anaerotignum propionicum DSM 1682 (taxid 991789)	NODE_1302_length_42734_cov_6.218299	tRNA
vOTU-220	Anaerotignum propionicum DSM 1682 (taxid 991789)	NODE_1302_length_42734_cov_6.218299	tRNA
vOTU-158	Anaerotignum propionicum DSM 1682 (taxid 991789)	NODE_3583_length_23138_cov_3.821777	Blastn
vOTU-528	Anaerotignum propionicum DSM 1682 (taxid 991789)	NODE_13784_length_6365_cov_28.110846	Blastn
vOTU-695	Anaerotignum propionicum DSM 1682 (taxid 991789)	NODE_6902_length_12369_cov_13.270582	Blastn
vOTU-158	Anaerotignum propionicum DSM 1682 (taxid 991789)	NODE_1300_length_59535_cov_11.111238	Blastn
vOTU-695	Anaerotignum propionicum DSM 1682 (taxid 991789)	NODE_11741_length_8610_cov_2.810149	Blastn
vOTU-271	Anaerotignum propionicum DSM 1682 (taxid 991789)	NODE_18169_length_4707_cov_4.173866	Blastn
vOTU-433	Anaerotignum propionicum DSM 1682 (taxid 991789)	NODE_18169_length_4707_cov_4.173866	Blastn
vOTU-158	Anaerotignum propionicum DSM 1682 (taxid 991789)	NODE_1293_length_42926_cov_6.077738	Blastn
vOTU-2	Anaerotignum propionicum DSM 1682 (taxid 991789)	NODE_17907_length_5451_cov_47.571641	Blastn
vOTU-158	Anaerotignum propionicum DSM 1682 (taxid 991789)	NODE_2866_length_28205_cov_3.870236	Blastn
vOTU-261	Anaerotignum propionicum DSM 1682 (taxid 991789)	NODE_2866_length_28205_cov_3.870236	Blastn
vOTU-137	Anaerotignum propionicum DSM 1682 (taxid 991789)	NODE_2866_length_28205_cov_3.870236	tRNA
vOTU-220	Anaerotignum propionicum DSM 1682 (taxid 991789)	NODE_2866_length_28205_cov_3.870236	tRNA
vOTU-695	Anaerotignum propionicum DSM 1682 (taxid 991789)	NODE_6140_length_14252_cov_4.530723	Blastn
vOTU-204	Anaerotignum propionicum DSM 1682 (taxid 991789)	NODE_369387_length_562_cov_2.303093	tRNA
vOTU-56	Anaerotignum propionicum DSM 1682 (taxid 991789)	NODE_468004_length_479_cov_1.104478	tRNA
vOTU-230	Anaerotignum propionicum DSM 1682 (taxid 991789)	NODE_521484_length_502_cov_3.435294	tRNA
vOTU-36	Anaerotignum propionicum DSM 1682 (taxid 991789)	NODE_521484_length_502_cov_3.435294	tRNA
vOTU-76	Anaerotignum propionicum DSM 1682 (taxid 991789)	NODE_521484_length_502_cov_3.435294	tRNA
vOTU-271	Anaerotignum propionicum DSM 1682 (taxid 991789)	NODE_6349_length_9123_cov_7.409242	Blastn
vOTU-433	Anaerotignum propionicum DSM 1682 (taxid 991789)	NODE_6349_length_9123_cov_7.409242	Blastn
vOTU-600	Anaplasma phagocytophilum (taxid 948)	NODE_351129_length_497_cov_1.057143	tRNA
vOTU-1053	Ancylobacter pratisalsi (taxid 1745854)	NODE_13072_length_7125_cov_8.848326	Blastn
vOTU-498	Ancylobacter pratisalsi (taxid 1745854)	NODE_13072_length_7125_cov_8.848326	Blastn
vOTU-259	Anoxybacter fermentans (taxid 1323375)	NODE_10557_length_8626_cov_3.168441	Blastn
vOTU-35	Anoxybacter fermentans (taxid 1323375)	NODE_769418_length_376_cov_0.989967	tRNA
vOTU-59	Antarcticibacterium sp. PAMC 28998 (taxid 2585771)	NODE_12490_length_8138_cov_43.248977	Blastn
vOTU-218	Antarctobacter heliothermus (taxid 74033)	NODE_13410_length_6204_cov_105.384854	Blastn
vOTU-1284	Aquiflexum balticum DSM 16537 (taxid 758820)	NODE_11275_length_8119_cov_7.681174	Blastn
vOTU-1284	Aquiflexum balticum DSM 16537 (taxid 758820)	NODE_3531_length_23438_cov_14.361414	Blastn
vOTU-1476	Aquiflexum balticum DSM 16537 (taxid 758820)	NODE_3531_length_23438_cov_14.361414	Blastn
vOTU-616	Aquiflexum balticum DSM 16537 (taxid 758820)	NODE_3531_length_23438_cov_14.361414	Blastn
vOTU-477	Aquimarina sp. AD1 (taxid 1714848)	NODE_39540_length_2639_cov_3.177205	Blastn
vOTU-145	Aquitalea (taxid 407217)	NODE_78801_length_1757_cov_3.619643	tRNA
vOTU-253	Aquitalea (taxid 407217)	NODE_78801_length_1757_cov_3.619643	tRNA
vOTU-4380	Aquitalea (taxid 407217)	NODE_78801_length_1757_cov_3.619643	tRNA
vOTU-45	Aquitalea (taxid 407217)	NODE_78801_length_1757_cov_3.619643	tRNA
vOTU-461	Aquitalea (taxid 407217)	NODE_78801_length_1757_cov_3.619643	tRNA
vOTU-531	Aquitalea (taxid 407217)	NODE_78801_length_1757_cov_3.619643	tRNA
vOTU-265	Arabia massiliensis (taxid 1870985)	NODE_16679_length_5070_cov_45.867014	Blastn
vOTU-265	Arabia massiliensis (taxid 1870985)	NODE_41233_length_2554_cov_13.746468	Blastn
[truncated: 23,108 more rows]
